# Supplementary material
Source: PubMed Central journal article supplement (PMC3258445)

## Supporting Information

### **An Allenic Pauson–Khand Approach to 6,12-Guaianolides**

Francois Grillet, Chaofeng Huang, and Kay M. Brummond\*

## Table of contents

|                                                     |           |
|-----------------------------------------------------|-----------|
| General methods.....                                | S1        |
| Experimental procedures.....                        | S2 – S28  |
| <sup>1</sup> H and <sup>13</sup> C NMR spectra..... | S29 – S79 |

## General Methods

Unless otherwise noted, all reactions were performed under N<sub>2</sub> in flame-dried glassware using standard syringe, cannula, and septum techniques. All commercially available compounds were used as received unless otherwise noted. The reaction solvents tetrahydrofuran (THF) and dichloromethane (CH<sub>2</sub>Cl<sub>2</sub>) were purified by passing through alumina using the Sol-Tek ST-002 solvent purification system. Lithium chloride and cerium (III) trichloride were stored in a glovebox. Toluene and triethylamine (NEt<sub>3</sub>) were freshly distilled from CaH<sub>2</sub> prior to use. Flash chromatography was performed using silica gel (32-63 μm particle size, 60 Å pore size). Thin layer chromatography (TLC) analysis was performed using silica gel 60 F<sub>254</sub> plates (250 μm thickness). <sup>1</sup>H NMR and <sup>13</sup>C NMR spectra were recorded on Bruker Avance 300 MHz, 400 MHz, 500 MHz or 700 MHz spectrometers. Spectra were referenced to residual chloroform (7.26 ppm, <sup>1</sup>H, 77.0 ppm, <sup>13</sup>C). Chemical shifts are reported in ppm, multiplicities are indicated by s (singlet), d (doublet), t (triplet), q (quartet), p (pentet) and m (multiplet). Coupling constants, *J*, are reported in hertz. All NMR spectra were obtained at room temperature. IR spectra were obtained using a Nicolet Avatar E.S.P. 360 FT-IR. EI mass spectroscopy was performed on a Micromass Autospec high resolution mass spectrometer.

## Experimental Section

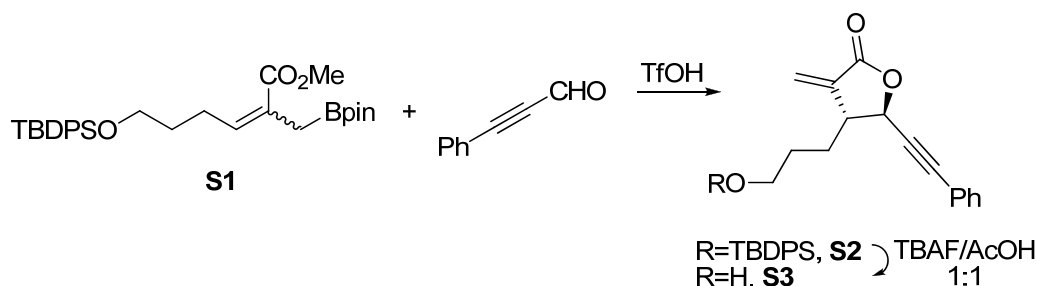

**4-(3-hydroxypropyl)-3-methylidene-5-(phenylethynyl)dihydrofuran-2(3H)-one (S3):** A flame-dried round bottom flask equipped with a Teflon-coated stir-bar was charged with **S1** (5.30 g, 10 mmol, *E:Z* = 1:2), 3-phenylprop-2-ynal (2.6 g, 20 mmol) and toluene (250 mL) at 0 °C. The resulting solution was treated with trifluoromethanesulfonic acid (150 mg, 1.0 mmol) and stirred at 0 °C under a nitrogen atmosphere for 16 h. The mixture was then diluted with  $\text{NH}_4\text{Cl}$  (aq) :  $\text{NH}_4\text{OH}$  (9:1, v/v, 100 mL) and extracted with  $\text{Et}_2\text{O}$  (3×50 mL). The combined extracts were washed with brine (50 mL), dried over  $\text{Na}_2\text{SO}_4$ , filtered and concentrated under reduced pressure. Purification of the residue by flash chromatography (20%  $\text{Et}_2\text{O}$ /hexanes) afforded *trans*-lactone **S2** (283 mg, 37%) and *cis*-lactone **S2** (124 mg, 16%) as yellow oils. The two isomers were obtained in a *trans:cis* 4.74:1 ratio. Along with the two TBDPS-protected isomers was also obtained a mixture of *cis* and *trans* desilylated lactones **S3** (37.6 mg, 9%) in a *trans:cis* 3:1 ratio.

### Data for *trans*-lactone **S2** :

**<sup>1</sup>H NMR** (CDCl<sub>3</sub>, 300 MHz)  
 7.72 – 7.69 (m, 4H), 7.47 – 7.34 (m, 11H), 6.36 (d, *J* = 2.7 Hz, 1H), 5.66 (d, *J* = 2.4 Hz, 1H), 4.98 (d, *J* = 5.7 Hz, 1H), 3.81 – 3.76 (m, 2H), 3.24 – 3.20 (m, 1H), 1.91 – 1.90 (m, 1H), 1.80 – 1.70 (m, 3H), 1.10 (s, 9H).

**TLC**  $R_f$  = 0.47 (20%  $\text{Et}_2\text{O}$ /hexanes) [silica gel, UV,  $\text{KMnO}_4$  stain]

### Data for *cis*-lactone **S2** :

**<sup>1</sup>H NMR** (CDCl<sub>3</sub>, 300 MHz)  
 7.72 – 7.68 (m, 4H), 7.45 – 7.31 (m, 11H), 6.34 (d, *J* = 3.0 Hz, 1H), 5.62 (d, *J* = 2.7 Hz, 1H), 5.46 (d, *J* = 8.4 Hz, 1H), 3.80 – 3.75 (m, 2H), 3.25 – 3.15 (m, 1H), 1.99 – 1.92 (m, 2H), 1.82 – 1.72 (m, 2H), 1.08 (s, 9H).

TLC  $R_f = 0.37$  (20% Et<sub>2</sub>O/hexanes) [silica gel, UV, KMnO<sub>4</sub> stain]

*Trans*-lactone **S2** (1.20 g, 2.43 mmol) was charged into a round bottom flask equipped with a Teflon-coated stir-bar, and THF (25 mL) was added. The resulting mixture was then treated with a TBAF/AcOH (1:1, 1.0M, 2.7 mL, 2.7 mmol) solution.<sup>1</sup> The progress of the reaction was monitored by TLC and upon completion (2 h), the mixture was concentrated under reduced pressure. Purification of the residue by flash chromatography (20% Et<sub>2</sub>O/hexanes) afforded the title compound **S3** (400 mg, 63%) as a light yellow oil.

Data for desilylated *trans*-lactone **S3** :

<sup>1</sup>H NMR (300 MHz, CDCl<sub>3</sub>)  
7.46 – 7.42 (m, 2H), 7.37 – 7.30 (m, 3H), 6.34 (d,  $J = 2.7$  Hz, 1H), 5.69 (d,  $J = 2.4$  Hz, 1H), 4.99 (d,  $J = 5.4$  Hz, 1H), 3.73 (t,  $J = 6.0$  Hz, 2H), 3.24 – 3.20 (m, 1H), 1.91 – 1.88 (m, 2H), 1.79 – 1.73 (m, 2H).

<sup>13</sup>C NMR (CDCl<sub>3</sub>, 75 MHz)  
169.4, 137.6, 131.8 (2C), 129.2, 128.4 (2C), 123.2, 121.5, 87.9, 85.0, 72.5, 62.1, 46.7, 29.5, 29.2.

IR Thin film  
3423, 2937, 2868, 2231, 1769, 1495, 1270, 1127, 984, 760.

MS  $m/z$  (%) 256 (30), 198 (100), 131 (75), 98 (70), 83 (75).

HRMS EI<sup>+</sup>: C<sub>16</sub>H<sub>16</sub>O<sub>3</sub> [M]<sup>+</sup>  
Calculated: 256.1099. Found: 256.1006.

TLC  $R_f = 0.1$  (20% Et<sub>2</sub>O/hexanes) [silica gel, UV, KMnO<sub>4</sub> stain]

*Cis*-lactone **S2** (370 mg, 0.75 mmol) was charged into a round bottom flask equipped with a Teflon-coated stir-bar, followed by THF (15 mL). The resulting mixture was then treated with a TBAF/AcOH (1:1, 1.0 M in THF, 0.8 mL, 0.8 mmol) solution.<sup>1</sup> The progress of the reaction was monitored by TLC and upon completion (3 h), the mixture was concentrated under reduced

---

<sup>1</sup> The TBAF/AcOH solution was prepared from a modified procedure reported by Hall : A flame-dried round bottom flask equipped with a Teflon-coated stir-bar was charged with tetra-*n*-butylammonium fluoride (10 mL, 1.0 M solution in THF, 10 mmol), and glacial acetic acid (572  $\mu$ L, 10 mmol) was added to this solution at rt. The solution was stirred under argon for 30 min.

pressure. Purification of the residue by flash chromatography (20% Et<sub>2</sub>O/hexanes) afforded the title compound **S3** (153 mg, 80%) as a light yellow oil.

Data for desilylated *cis*-lactone **S3** :

<sup>1</sup>H NMR (CDCl<sub>3</sub>, 300 MHz)  
7.42 – 7.39 (m, 2H), 7.32 – 7.28 (m, 3H), 6.28 (d, *J* = 3.0 Hz, 1H), 5.63 (d, *J* = 2.7 Hz, 1H), 5.46 (br s, 1H), 3.68 (dt, *J* = 1.5, 6.0 Hz, 2H), 3.23 – 3.14 (m, 1H), 2.91 (s, 1H), 1.91 – 1.86 (m, 2H), 1.74 – 1.69 (m, 2H).

<sup>13</sup>C NMR (CDCl<sub>3</sub>, 75 MHz)  
170.0, 137.4, 131.8 (2C), 129.2, 128.5 (2C), 122.7, 121.4, 89.8, 82.2, 71.7, 62.3, 43.0, 29.5, 26.3.

IR Thin film  
3420, 2938, 2868, 2235, 1769, 1659, 1487, 1266, 968, 760.

HRMS EI+: C<sub>16</sub>H<sub>16</sub>O<sub>3</sub>Na<sub>1</sub> [M+Na]<sup>+</sup>  
Calculated: 279.0997. Found: 279.1016.

TLC R<sub>f</sub> = 0.15 (20% Et<sub>2</sub>O/hexanes) [silica gel, UV, KMnO<sub>4</sub> stain]

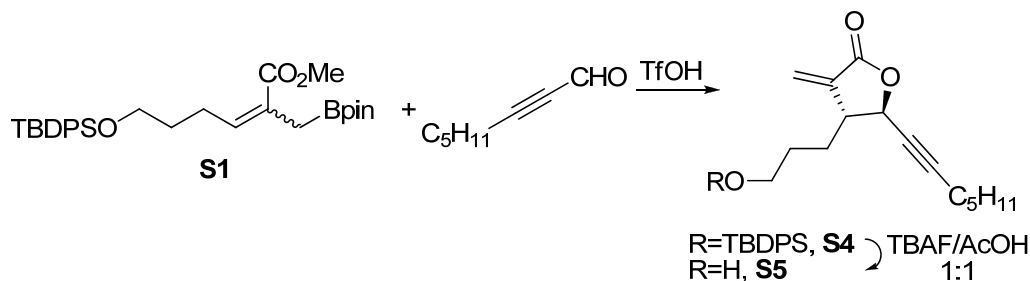

**5-(hept-1-yn-1-yl)-4-(3-hydroxypropyl)-3-methylidenedihydrofuran-2(3H)-one (S5):** A flame-dried round bottom flask equipped with a Teflon-coated stir-bar was charged with **S1** (1.0 g, 1.9 mmol, *E:Z* = 1:1.5), oct-2-ynal (473 mg, 3.8 mmol) and toluene (50 mL) at 0 °C. The resulting solution was treated with trifluoromethanesulfonic acid (25 mg, 0.16 mmol) and stirred at 0 °C, using a large Dewar filled with ice, under a nitrogen atmosphere for 14 h. The mixture was then diluted with NH<sub>4</sub>Cl (aq) : NH<sub>4</sub>OH (9:1, v/v, 50 mL) and extracted with Et<sub>2</sub>O (3×25 mL). The combined extracts were washed with brine (20 mL), dried over Na<sub>2</sub>SO<sub>4</sub>, filtered and concentrated. The two isomers were obtained in a *trans:cis* 1.65:1 ratio, as judged by crude <sup>1</sup>H NMR. Purification of the residue by flash chromatography (20% Et<sub>2</sub>O/hexanes) afforded *trans*-

lactone **S4** (320 mg, 34%) and *cis*-lactone **S4** (160 mg, 17%) as yellow oils. Along with the two TBDPS-protected isomers was also obtained a mixture of *cis* and *trans* desilylated lactones **S5** (100 mg, 21%) in a *trans:cis* 2.5:1 ratio. *Trans*-TBDPS-protected lactone **S4** (300 mg, 0.62 mmol) was charged into a round bottom flask equipped with a Teflon-coated stir-bar and THF (5 mL) was added. The resulting mixture was then treated with a TBAF/AcOH (1:1, 1.0 M in THF, 0.68 mL, 0.68 mmol) solution.<sup>1</sup> The progress of the reaction was monitored by TLC and upon completion (3 h), the mixture was concentrated under reduced pressure. Purification of the residue by flash chromatography (20% Et<sub>2</sub>O/hexanes) afforded the title compound **S5** (60 mg, 65%) as a brown oil.

Data for desilylated *trans*-lactone **S5**:

<sup>1</sup>H NMR (CDCl<sub>3</sub>, 300 MHz)  
 6.29 (d, *J* = 3.0 Hz, 1H), 5.66 (d, *J* = 2.4 Hz, 1H), 4.76 (dt, *J* = 2.1, 5.7 Hz, 1H), 3.70 (t, *J* = 6.0 Hz, 2H), 3.10 – 3.00 (m, 1H), 2.75 (br s, 1H), 2.2 (dt, *J* = 1.8, 6.9 Hz, 2H), 1.86 – 1.83 (m, 1H), 1.73 – 1.64 (m, 3H), 1.54 – 1.49 (m, 2H), 1.36 – 1.30 (m, 4H), 0.90 (t, *J* = 6.9 Hz, 3H).

<sup>13</sup>C NMR (CDCl<sub>3</sub>, 75 MHz)  
 169.6, 137.9, 122.7, 89.5, 76.5, 72.6, 62.0, 46.9, 30.9, 29.4, 29.1, 27.9, 22.1, 18.6, 13.9.

IR Thin film  
 3420, 2929, 2864, 2235, 1773, 1401, 1266, 1127, 972, 813.

MS *m/z* (%) 250 (15), 126 (100), 98 (55), 69 (56).

HRMS EI<sup>+</sup>: C<sub>15</sub>H<sub>22</sub>O<sub>3</sub> [M]<sup>+</sup>  
 Calculated: 250.1569. Found: 250.1564.

TLC R<sub>f</sub> = 0.1 (20% Et<sub>2</sub>O/hexanes) [silica gel, UV, KMnO<sub>4</sub> stain]

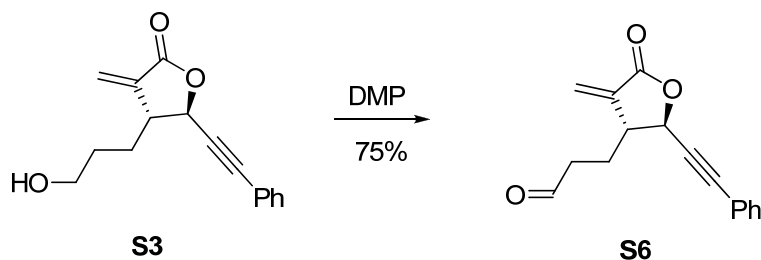

**3-[4-methylidene-5-oxo-2-(phenylethynyl)tetrahydrofuran-3-yl]propanal (S6):** A flame-dried round bottom flask equipped with a Teflon-coated stir-bar was charged with **S5** (400 mg, 1.56 mmol) and CH<sub>2</sub>Cl<sub>2</sub> (30 mL). The resulting solution was treated with Dess-Martin periodinane (728 mg, 1.72 mmol). The progress of the reaction was monitored by TLC and upon completion (3 h), the mixture was concentrated under reduced pressure and purified by flash chromatography (80% Et<sub>2</sub>O/hexanes) to afford the title compound **S6** (300 mg, 75%) as a slightly yellow oil.

**<sup>1</sup>H NMR** (CDCl<sub>3</sub>, 300 MHz)  
 9.82 (br s, 1H), 7.43 – 7.40 (m, 2H), 7.34 – 7.30 (m, 3H), 6.35 (d, *J* = 2.7 Hz, 1H), 5.67 (d, *J* = 2.7 Hz, 1H), 4.93 (d, *J* = 6.0 Hz, 1H), 3.24 – 3.20 (m, 1H), 2.69 (t, *J* = 7.5 Hz, 2H), 2.17 – 2.12 (m, 1H), 2.10 – 2.07 (m, 1H).

**<sup>13</sup>C NMR** (CDCl<sub>3</sub>, 75 MHz)  
 200.6, 168.9, 137.0, 131.8 (2C), 129.3, 128.4 (2C), 123.4, 121.2, 88.2, 84.7, 72.2, 46.0, 40.2, 24.5.

**IR** Thin film  
 3524, 2933, 2827, 2729, 2230, 1773, 1716, 1442, 1270, 1131, 972.

**HRMS** EI+: C<sub>16</sub>H<sub>14</sub>O<sub>3</sub>Na<sub>1</sub> [M+Na]<sup>+</sup>  
 Calculated: 277.0841. Found: 277.0823.

**TLC** R<sub>f</sub> = 0.35 (33:33:33, Et<sub>2</sub>O/CH<sub>2</sub>Cl<sub>2</sub>/hexanes) [silica gel, UV, KMnO<sub>4</sub> stain]

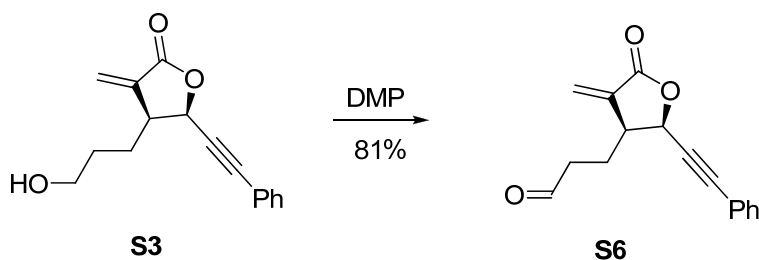

**3-[4-methylidene-5-oxo-2-(phenylethynyl)tetrahydrofuran-3-yl]propanal (S6):** A flame-dried round bottom flask equipped with a Teflon-coated stir-bar was charged with **S3** (150 mg, 0.59 mmol) and CH<sub>2</sub>Cl<sub>2</sub> (5 mL). The resulting solution was treated with Dess-Martin periodinane (300 mg, 0.7 mmol). The progress of the reaction was monitored by TLC and upon completion (2 h), the mixture was concentrated under reduced pressure and purified by flash

chromatography (80% Et<sub>2</sub>O/hexanes) to afford the title compound **S6** (120 mg, 81%) as a slightly yellow oil.

<sup>1</sup>H NMR (CDCl<sub>3</sub>, 300 MHz)  
9.83 (t, *J* = 0.9 Hz, 1H), 7.43 – 7.40 (m, 2H), 7.37 – 7.31 (m, 3H), 6.35 (d, *J* = 2.7 Hz, 1H), 5.69 (d, *J* = 2.7 Hz, 1H), 5.48 (d, *J* = 8.4 Hz, 1H), 3.31 – 3.23 (m, 1H), 2.69 (t, *J* = 8.4 Hz, 2H), 2.17 (q, *J* = 7.3 Hz, 2H).

<sup>13</sup>C NMR (CDCl<sub>3</sub>, 75 MHz)  
200.9, 169.2, 137.0, 131.8 (2C), 129.4, 128.5 (2C), 123.2, 121.2, 90.3, 81.8, 71.1, 42.0, 40.6, 22.3.

IR Thin film  
2921, 2827, 2725, 2238, 1761, 1708.

HRMS EI+: C<sub>16</sub>H<sub>14</sub>O<sub>3</sub>Na<sub>1</sub> [M+Na]<sup>+</sup>  
Calculated: 277.0841. Found: 277.0817.

TLC R<sub>f</sub> = 0.3 (33:33:33, Et<sub>2</sub>O/CH<sub>2</sub>Cl<sub>2</sub>/hexanes) [silica gel, UV, KMnO<sub>4</sub> stain]

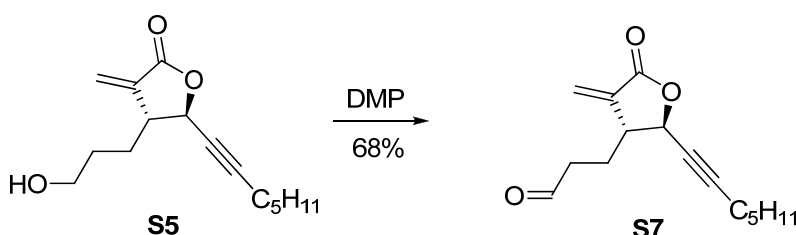

**3-[2-(hept-1-yn-1-yl)-4-methylidene-5-oxotetrahydrofuran-3-yl]propanal (S7):** A flame-dried round bottom flask equipped with a Teflon-coated stir-bar was charged with **S5** (90 mg, 0.36 mmol) and CH<sub>2</sub>Cl<sub>2</sub> (5 mL). The resulting solution was treated with Dess-Martin periodinane (183 mg, 0.43 mmol). The progress of the reaction was monitored by TLC and upon completion (2 h), the mixture was concentrated under reduced pressure and purified by flash chromatography (80% Et<sub>2</sub>O/hexanes) to afford the title compound **S7** (60 mg, 68%) as a slightly yellow oil.

<sup>1</sup>H NMR (CDCl<sub>3</sub>, 300 MHz)  
9.83 (br s, 1H), 6.32 (d, *J* = 2.7 Hz, 1H), 5.66 (d, *J* = 2.1 Hz, 1H), 4.72 (dt, *J* = 2.1, 6.0 Hz, 1H), 3.10 – 3.07 (m, 1H), 2.68 (t, *J* = 7.5 Hz, 2H), 2.23



(dt,  $J = 2.1, 7.2$  Hz, 2H), 2.14 – 2.06 (m, 1H), 1.92 – 1.85 (m, 1H), 1.54 – 1.49 (m, 2H), 1.38 – 1.30 (m, 4H), 0.89 (t,  $J = 7.2$  Hz, 3H).

$^{13}\text{C}$  NMR

( $\text{CDCl}_3$ , 75 MHz)

200.4, 168.9, 137.4, 122.9, 89.9, 76.2, 72.2, 46.2, 40.2, 31.0, 27.8, 24.5, 22.1, 18.6, 13.9.

IR

Thin film

2925, 2859, 2717, 2247, 1765, 1728, 1266, 1135, 968, 812.

MS

$m/z$  (%) 248 (55), 192 (35), 124 (100), 96 (70), 66 (91).

HRMS

EI+:  $\text{C}_{15}\text{H}_{20}\text{O}_3$   $[\text{M}]^+$

Calculated: 248.1412. Found: 248.1412.

TLC

$R_f = 0.5$  (33:33:33,  $\text{Et}_2\text{O}/\text{CH}_2\text{Cl}_2/\text{hexanes}$ ) [silica gel, UV,  $\text{KMnO}_4$  stain]

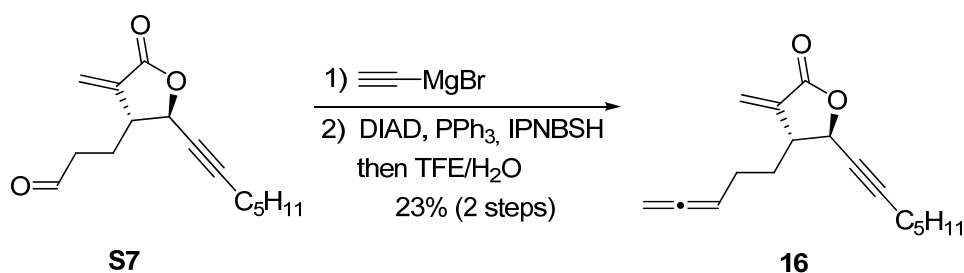

**5-(hept-1-yn-1-yl)-3-methylidene-4-(penta-3,4-dien-1-yl)dihydrofuran-2(3H)-one (16):** A flame-dried round bottom flask equipped with a Teflon-coated stir-bar was charged with **S7** (50 mg, 0.20 mmol) and THF (3 mL) at 0 °C. The resulting solution was treated with ethynyl magnesium bromide (0.5 M in THF, 0.48 mL, 0.24 mmol) and stirred at 0 °C under nitrogen atmosphere for 1 h. The mixture was then diluted with saturated  $\text{NH}_4\text{Cl}$  (aq.) (10 mL) and extracted with  $\text{Et}_2\text{O}$  ( $3 \times 10$  mL). The combined organic layers were washed with brine (10 mL), dried over  $\text{Na}_2\text{SO}_4$ , filtered and concentrated under reduced pressure. The propargyl alcohol was not stable to column chromatography, so it was taken on immediately to the next step. The crude product was then charged into a flame-dried 10 mL round bottom flask equipped with a Teflon-coated stir-bar, followed by  $\text{PPh}_3$  (63 mg, 0.24 mmol), *N*-isopropylidene-*N'*-2-nitrobenzenesulfonyl hydrazine<sup>2</sup> (62 mg, 0.24 mmol) and THF (3 mL). The resulting solution

<sup>2</sup> This procedure was performed according to the following described procedure :  
M. Movassaghi, O. K. Ahmad, *J. Org. Chem.* **2007**, *72*, 1838-1841.

was cooled to 0 °C, stirred under nitrogen and diisopropylazodicarboxylate (50 mg, 0.24 mmol) was added dropwise. After 5 min, the ice/water bath was removed and the reaction was stirred at rt. The progress of the reaction was monitored by TLC and upon completion (19 h), TFE/H<sub>2</sub>O (1:1, 3.0 mL) was added. After 4 h, the mixture was diluted with pentane/H<sub>2</sub>O (1:1, 10 mL) and extracted with Et<sub>2</sub>O (3×10 mL). The combined organic layers were washed with brine (10 mL), dried over Na<sub>2</sub>SO<sub>4</sub>, filtered and concentrated under reduced pressure. Purification of the residue by flash chromatography (20% Et<sub>2</sub>O/hexanes) afforded the title compound **16** (12 mg, 23%, 2 steps) as a slightly yellow oil.

<sup>1</sup>H NMR (CDCl<sub>3</sub>, 300 MHz)  
 6.29 (d, *J* = 2.7 Hz, 1H), 5.63 (d, *J* = 2.4 Hz, 1H), 5.13 (p, *J* = 6.6 Hz, 1H), 4.76 – 4.71 (m, 3H), 3.11 – 3.08 (m, 1H), 2.22 (dt, *J* = 1.8, 6.9 Hz, 2H), 2.19 – 2.13 (m, 2H), 1.83 – 1.79 (m, 1H), 1.79 – 1.72 (m, 1H), 1.54 – 1.49 (m, 2H), 1.37 – 1.30 (m, 4H), 0.90 (t, *J* = 7.2 Hz, 3H).

<sup>13</sup>C NMR (CDCl<sub>3</sub>, 75 MHz)  
 208.7, 169.4, 137.9, 122.6, 89.5, 88.7, 76.6, 75.8, 72.6, 46.4, 32.3, 30.1, 27.9, 24.7, 22.1, 18.7, 14.0.

IR Thin film  
 2925, 2852, 2238, 1956, 1769, 1270, 1127, 976.

HRMS EI<sup>+</sup>: C<sub>17</sub>H<sub>22</sub>O<sub>2</sub>Na<sub>1</sub> [M+Na]<sup>+</sup>  
 Calculated: 281.1517. Found: 281.1528.

TLC R<sub>f</sub> = 0.77 (20% Et<sub>2</sub>O/hexanes) [silica gel, KMnO<sub>4</sub> stain]

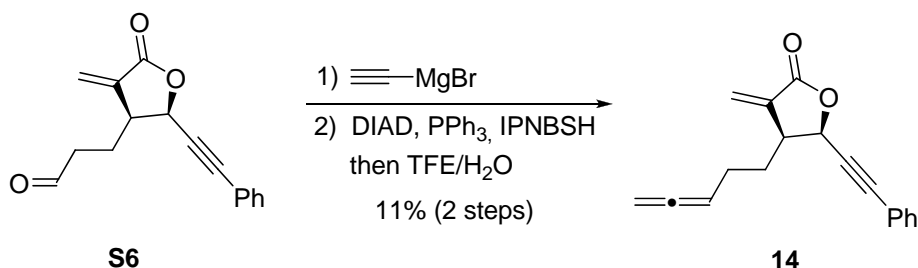

**3-methylidene-4-(penta-3,4-dien-1-yl)-5-(phenylethynyl)dihydrofuran-2(3*H*)-one (14):** A flame-dried round bottom flask equipped with a Teflon-coated stir-bar was charged with **S6** (100 mg, 0.39 mmol) and THF (3 mL) at 0 °C. The resulting solution was treated with ethynyl

magnesium bromide (0.5 M in THF, 1.01 mL, 0.51 mmol) and stirred at 0 °C under nitrogen atmosphere for 1 h. The mixture was then diluted with saturated NH<sub>4</sub>Cl (aq.) (10 mL) and extracted with Et<sub>2</sub>O (3×10 mL). The combined organic layers were washed with brine (10 mL), dried over Na<sub>2</sub>SO<sub>4</sub>, filtered and concentrated. The propargyl alcohol was not stable to column chromatography, so it was taken on immediately to the next step. The crude product was then charged into a flame-dried 10 mL round bottom flask equipped with a Teflon-coated stir-bar, followed by PPh<sub>3</sub> (98 mg, 0.37 mmol), *N*-isopropylidene-*N'*-2-nitrobenzenesulfonyl hydrazine (96 mg, 0.37 mmol) and THF (5 mL). The resulting solution was cooled to 0 °C, stirred under nitrogen and diisopropylazodicarboxylate (75 mg, 0.37 mmol) was added dropwise. After 5 min, the ice/water bath was removed and the reaction was stirred at rt. The progress of the reaction was monitored by TLC and upon completion (19 h), TFE/H<sub>2</sub>O (1:1, 3.0 mL) was added. After 4 h, the mixture was diluted with pentane/H<sub>2</sub>O (1:1, 10 mL) and extracted with Et<sub>2</sub>O (3×10 mL). The combined organic layers were washed with brine (10 mL), dried over Na<sub>2</sub>SO<sub>4</sub>, filtered and concentrated under reduced pressure. Purification of the residue by flash chromatography (20% Et<sub>2</sub>O/hexanes) afforded the title compound **14** (11 mg, 11%, 2 steps) as a slightly yellow oil.

<sup>1</sup>H NMR (CDCl<sub>3</sub>, 300 MHz)  
7.45 – 7.42 (m, 2H), 7.35 – 7.26 (m, 3H), 6.33 (d, *J* = 2.7 Hz, 1H), 5.65 (d, *J* = 2.7 Hz, 1H), 5.48 (d, *J* = 2.7 Hz, 1H), 5.16 (p, *J* = 6.6 Hz, 1H), 4.74 (dt, *J* = 3.0, 6.3 Hz, 2H), 3.29 – 3.26 (m, 1H), 2.25 – 2.17 (m, 2H), 2.06 – 1.94 (m, 2H).

<sup>13</sup>C NMR (CDCl<sub>3</sub>, 75 MHz)  
208.7, 169.6, 137.4, 131.9 (2C), 129.2, 128.4 (2C), 122.6, 121.5, 89.9, 88.8, 82.2, 75.7, 71.4, 42.3, 29.0, 25.1.

IR Thin film  
2925, 2848, 2231, 1957, 1773, 1433, 1258, 1102, 976.

MS *m/z* (%) 264 (50), 235 (70), 207 (85), 179 (75), 155 (100), 115 (95), 91 (55).

HRMS EI<sup>+</sup>: C<sub>18</sub>H<sub>16</sub>O<sub>2</sub> [M]<sup>+</sup>  
Calculated: 264.1150. Found: 264.1146.

TLC R<sub>f</sub> = 0.75 (20% Et<sub>2</sub>O/hexanes) [silica gel, UV, KMnO<sub>4</sub> stain]

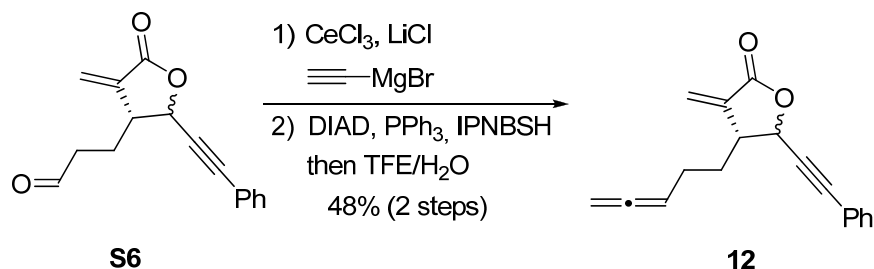

### 3-methylidene-4-(penta-3,4-dien-1-yl)-5-(phenylethynyl)dihydrofuran-2(3*H*)-one (**12**):

Lithium chloride (51 mg, 1.2 mmol) and cerium (III) trichloride (anhydrous beads, 149 mg, 0.60 mmol) were added to a flame-dried 25 mL Schlenk tube equipped with a Teflon-coated stir-bar in a glove box.<sup>3</sup> The Schlenk tube was removed from the glove box, THF (3.6 mL) was added, and the suspension was stirred vigorously at rt under nitrogen atmosphere for 13 h. The resulting solution was cooled to 0 °C, treated with ethynyl magnesium bromide (0.5 M in THF, 1.2 mL, 0.60 mmol) and stirred at 0 °C for 1.5 h. A solution of aldehyde **S6** (102 mg, 0.40 mmol, *E:Z* = 4:1) in THF (1.7 mL with a 0.3 mL rinse) was added and the mixture was stirred at 0 °C for 1 h. The solution was then diluted with saturated ammonium chloride (2 mL) and Et<sub>2</sub>O (6 mL). After stirring for 1 h, the mixture was filtered through a Celite plug and the filter cake was rinsed with Et<sub>2</sub>O (40 mL). The organic phase was separated and the aqueous layer was extracted with Et<sub>2</sub>O (10 mL, 2×). The combined organic layers were washed with brine (10 mL), dried over Na<sub>2</sub>SO<sub>4</sub>, filtered and concentrated under reduced pressure. The propargyl alcohol was not stable to column chromatography, so it was taken on immediately to the next step.

Half of the crude product was then charged into a flame-dried 25 mL round bottom flask equipped with a Teflon-coated stir-bar, followed by PPh<sub>3</sub> (56 mg, 0.21 mmol), *N*-isopropylidene-*N*'-2-nitrobenzenesulfonyl hydrazine (55 mg, 0.21 mmol) and THF (1.5 mL). The resulting solution was cooled to 0 °C, stirred under nitrogen and diisopropylazodicarboxylate (43 mg, 0.21 mmol) was added dropwise. After 5 min, the ice/water bath was removed and the reaction was stirred at rt. The progress of the reaction was monitored by TLC and upon completion (13 h), TFE/H<sub>2</sub>O (1:1, 1.4 mL) was added. After 3 h, the mixture was diluted with pentane/H<sub>2</sub>O (1:1, 6.7 mL) and extracted with Et<sub>2</sub>O (3×10 mL). The combined organic layers were washed with brine (10 mL), dried over Na<sub>2</sub>SO<sub>4</sub>, filtered and concentrated under reduced pressure. The crude residue was loaded onto a 25 g SNAP column and purified using a Biotage normal phase automated

<sup>3</sup> This procedure was adapted from a literature procedure :  
B. M. Trost, J. Waser, A. Meyer, *J. Am. Chem. Soc.* **2008**, *130*, 16424-16434.

purification system with a gradient of 6 – 14% Et<sub>2</sub>O/pentane to afford *trans*-allene **12** (18.2 mg, 39%, 2 steps) along with a second fraction of a *cis:trans* 6:4 mixture of allenes (4.2 mg, 9%, 2 steps) as slightly yellow oils.

Data for the *trans*-isomer **12** :

<sup>1</sup>H NMR (CDCl<sub>3</sub>, 300 MHz)  
7.46 – 7.43 (m, 2H), 7.36 – 7.32 (m, 3H), 6.35 (d, *J* = 2.4 Hz, 1H), 5.69 (d, *J* = 2.1 Hz, 1H), 5.17 (p, *J* = 6.6 Hz, 1H), 5.00 (d, *J* = 5.4 Hz, 1H), 4.74 (dt, *J* = 3.3, 6.6 Hz, 2H), 3.29 – 3.25 (m, 1H), 2.23 – 2.17 (m, 2H), 1.90 – 1.77 (m, 2H).

<sup>13</sup>C NMR (CDCl<sub>3</sub>, 75 MHz)  
208.7, 169.3, 137.5, 131.8 (2C), 129.2, 128.4 (2C), 123.1, 121.5, 88.6, 87.8, 85.1, 76.0, 72.4, 46.2, 32.4, 24.7.

IR Thin film  
2925, 2847, 2230, 1961, 1769, 1433, 1270, 1127, 976.

MS *m/z* (%) 264 (50), 165 (50), 129 (85), 115 (70), 91 (100), 77 (62).

HRMS EI<sup>+</sup>: C<sub>18</sub>H<sub>16</sub>O<sub>2</sub> [M]<sup>+</sup>  
Calculated: 264.1150. Found: 264.1148.

TLC R<sub>f</sub> = 0.8 (20% Et<sub>2</sub>O/hexanes) [silica gel, UV, KMnO<sub>4</sub> stain]

**General Procedure for the [Rh(CO)<sub>2</sub>Cl]<sub>2</sub>-Catalyzed Cyclocarbonylation Reaction.** A flame-dried vial (15 x 45 mm) equipped with a Teflon-coated stir-bar and a septa cap was charged with allene-yne and toluene (0.1 M, toluene degassed by bubbling with nitrogen for ~ 5 min). The tube was evacuated for 3-5 sec. and refilled with CO (g) (3 x). To the allene-yne solution was added [Rh(CO)<sub>2</sub>Cl]<sub>2</sub> (0.10 equiv) in one portion, and the vial was evacuated and refilled with CO (g) (3 x). The vial was placed in a preheated 90 °C oil bath and stirred under CO (g). After the reaction was complete by TLC, the mixture was cooled to rt, passed through a short plug of Celite using Et<sub>2</sub>O, and concentrated in vacuo. The crude material was purified by flash chromatography.

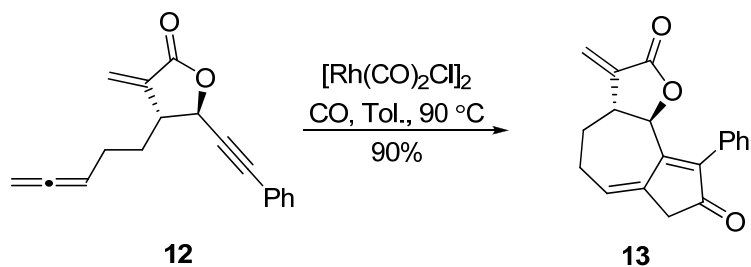

**3-methylene-9-phenyl-3,3a,4,5-tetrahydroazuleno[4,5-*b*]furan-2,8(7*H*,9*bH*)-dione (13):**

Following the General Procedure for the  $[\text{Rh}(\text{CO})_2\text{Cl}]_2$  Catalyzed Cyclocarbonylation Reaction, allene-ynone **12** (10 mg, 0.038 mmol) and  $[\text{Rh}(\text{CO})_2\text{Cl}]_2$  (1 mg,  $2.5 \times 10^{-3}$  mmol) were reacted in toluene (1 mL) for 30 min. Purification of the residue by flash chromatography (80%  $\text{Et}_2\text{O}$ /hexanes) afforded the title compound **13** (10 mg, 90%) as a slightly yellow oil.

$^1\text{H NMR}$  (CDCl<sub>3</sub>, 300 MHz)  
 7.42 – 7.36 (m, 3H), 7.29 – 7.26 (m, 2H), 6.77 (d,  $J = 3.3$  Hz, 1H), 6.02 (t,  $J = 6.3$  Hz, 1H), 5.60 (d,  $J = 3.0$  Hz, 1H), 5.36 (d,  $J = 9.9$  Hz, 1H), 3.24 (s, 2H), 3.21 – 3.14 (m, 1H), 2.59 – 2.58 (m, 2H), 2.49 – 2.40 (m, 1H), 1.95 – 1.86 (m, 1H).

$^{13}\text{C NMR}$  (75 MHz, CDCl<sub>3</sub>)  
 202.9, 168.3, 159.7, 143.1, 138.5, 134.2, 130.8, 129.7 (2C), 128.5, 128.3, 127.6 (2C), 126.4, 80.0, 44.3, 41.9, 26.7, 25.9.

IR Thin film  
 2925, 2859, 2079, 2006, 1777, 1703, 1266, 1139, 1008.

HRMS EI+: C<sub>19</sub>H<sub>16</sub>O<sub>3</sub> [M+H]<sup>+</sup>  
 Calculated: 293.1178. Found: 293.1156.

TLC R<sub>f</sub> = 0.5 (80%  $\text{Et}_2\text{O}$ /pentane) [silica gel, UV, KMnO<sub>4</sub> stain]

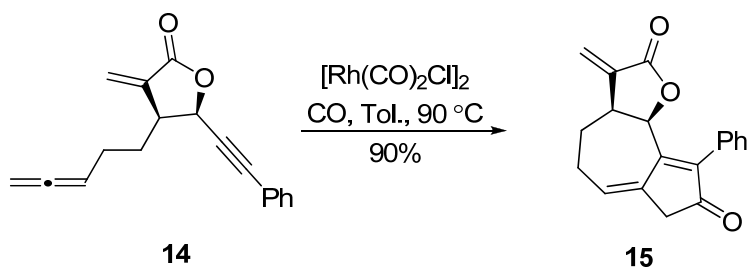

**3-methylene-9-phenyl-3,3a,4,5-tetrahydroazuleno[4,5-*b*]furan-2,8(7*H*,9*bH*)-dione (15):**

Following the General Procedure for the  $[\text{Rh}(\text{CO})_2\text{Cl}]_2$  Catalyzed Cyclocarbonylation Reaction, allene-yne **14** (10 mg, 0.038 mmol) and  $[\text{Rh}(\text{CO})_2\text{Cl}]_2$  (1 mg,  $2.5 \times 10^{-3}$  mmol) were reacted in toluene (1 mL) for 30 min. Purification of the residue by flash chromatography (80%  $\text{Et}_2\text{O}$ /hexanes) afforded the title compound **15** (10 mg, 90%) as a slightly yellow oil.

**$^1\text{H}$  NMR** ( $\text{CDCl}_3$ , 300 MHz)  
7.45 – 7.43 (m, 3H), 7.32 – 7.29 (m, 2H), 6.43 (d,  $J = 1.8$  Hz, 1H), 6.11 (t,  $J = 5.1$  Hz, 1H), 5.75 (d,  $J = 1.8$  Hz, 1H), 5.60 (d,  $J = 7.5$  Hz, 1H), 3.57 – 3.55 (m, 1H), 3.36 (d,  $J = 21$  Hz, 1H), 3.16 (d,  $J = 21$  Hz, 1H), 2.36 – 2.34 (m, 2H), 2.21 – 2.17 (m, 1H), 2.04 – 1.98 (m, 1H).

**$^{13}\text{C}$  NMR** ( $\text{CDCl}_3$ , 75 MHz)  
202.9, 169.7, 157.2, 148.1, 139.0, 134.0, 130.2, 129.5 (2C), 129.8, 129.1, 128.6 (2C), 124.2, 76.5, 42.5, 42.2, 35.0, 24.4.

**IR** Thin film  
2917, 2852, 1765, 1711, 1274, 1143, 1082, 976.

**MS**  $m/z$  (%) 292 (70), 165 (21), 84 (100).

**HRMS** EI+:  $\text{C}_{19}\text{H}_{16}\text{O}_3$   $[\text{M}]^+$   
Calculated: 292.1099. Found: 292.1089.

**TLC**  $R_f = 0.2$  (20%  $\text{Et}_2\text{O}$ /hexanes) [silica gel, UV,  $\text{KMnO}_4$  stain]

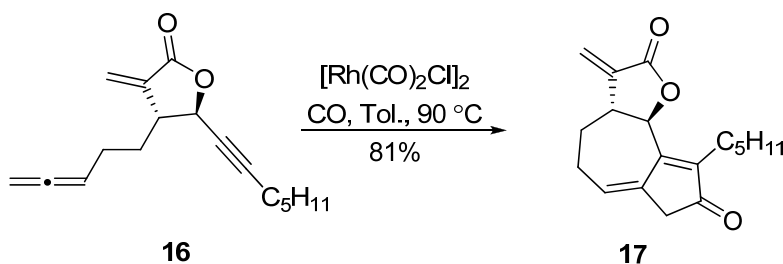**3-methylidene-9-pentyl-3a,5,7,9b-tetrahydroazuleno[4,5-*b*]furan-2,8(3*H*,4*H*)-dione (17):**

Following the General Procedure for the  $[\text{Rh}(\text{CO})_2\text{Cl}]_2$  Catalyzed Cyclocarbonylation Reaction, allene-yne **16** (10 mg, 0.038 mmol) and  $[\text{Rh}(\text{CO})_2\text{Cl}]_2$  (1 mg,  $2.5 \times 10^{-3}$  mmol) were reacted in toluene (1 mL) for 30 min. Purification of the residue by flash chromatography (67%  $\text{Et}_2\text{O}$ /hexanes) afforded the title compound **17** (9 mg, 81%) as a slightly yellow oil.

|                           |                                                                                                                                                                                                                                                                                                                                                   |
|---------------------------|---------------------------------------------------------------------------------------------------------------------------------------------------------------------------------------------------------------------------------------------------------------------------------------------------------------------------------------------------|
| <u><sup>1</sup>H NMR</u>  | (CDCl <sub>3</sub> , 300 MHz)<br>6.35 (d, <i>J</i> = 2.7 Hz, 1H), 5.83 (t, <i>J</i> = 4.5 Hz, 1H), 5.63 (d, <i>J</i> = 2.4 Hz, 1H), 5.20 (d, <i>J</i> = 9.9 Hz, 1H), 3.10 – 3.08 (m, 1H), 3.03 (s, 2H), 2.58 – 2.51 (m, 3H), 2.40 – 2.37 (m, 1H), 1.86 – 1.80 (m, 1H), 1.45 – 1.38 (m, 2H), 1.36 – 1.25 (m, 5H), 0.87 (t, <i>J</i> = 5.4 Hz, 3H). |
| <u><sup>13</sup>C NMR</u> | (CDCl <sub>3</sub> , 75 MHz)<br>204.8, 169.0, 158.6, 145.8, 138.4, 134.0, 124.4, 121.3, 81.1, 44.3, 41.5, 31.9, 29.3, 27.0, 25.9, 23.6, 22.5, 14.0.                                                                                                                                                                                               |
| <u>IR</u>                 | Thin film<br>2933, 2856, 2006, 1772, 1703, 1254, 1131, 1082, 1004.                                                                                                                                                                                                                                                                                |
| <u>HRMS</u>               | EI+: C <sub>18</sub> H <sub>23</sub> O <sub>3</sub> [M+H] <sup>+</sup><br>Calculated: 287.1647. Found: 287.1663.                                                                                                                                                                                                                                  |
| <u>TLC</u>                | R <sub>f</sub> = 0.2 (33% Et <sub>2</sub> O/hexanes) [silica gel, KMnO <sub>4</sub> stain]                                                                                                                                                                                                                                                        |

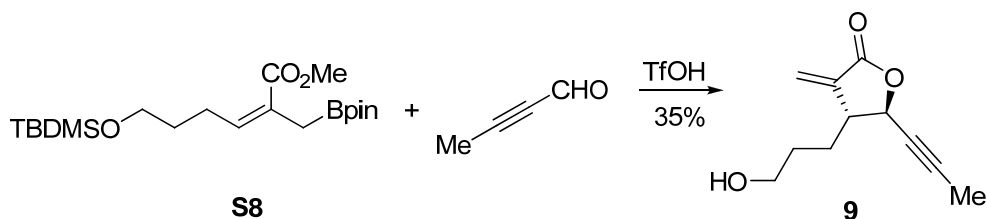

**4-(3-hydroxypropyl)-3-methylene-5-(prop-1-ynyl)dihydrofuran-2(3*H*)-one (9):** A flame-dried round bottom flask equipped with a Teflon-coated stir-bar was charged with **S8** (1.2 g, 3 mmol, *E:Z* = 1:4), but-2-ynal<sup>4</sup> (0.41 g, 6 mmol) and toluene (9.5 mL) at 0 °C. The resulting solution was treated with trifluoromethanesulfonic acid (45 mg, 0.3 mmol) and stirred at 0 °C under a nitrogen atmosphere for 12 h. The mixture was then diluted with NH<sub>4</sub>Cl (aq) : NH<sub>4</sub>OH (9:1, v/v, 61 mL) and extracted with Et<sub>2</sub>O (3×50 mL). The combined extracts were washed with brine (20 mL), dried over Na<sub>2</sub>SO<sub>4</sub>, filtered and concentrated under reduced pressure. The crude residue was loaded onto a 50 g SNAP column and purified using a Biotage normal phase automated purification system with a gradient of 45–95% Et<sub>2</sub>O/pentane to afford the title compound **9** (0.207 g, 35%) as a yellow oil. The product was obtained as a mixture of lactone

<sup>4</sup> This compound was synthesized according to the following procedure :  
J. Einhorn, C. Einhorn, F. Ratajczak, J.-L. Pierre, *J. Org. Chem.* **1996**, *61*, 7452-7454.



isomers in a *trans:cis* 4:1 ratio. A pure fraction of the *trans*-lactone was collected for characterization purposes.

Data for *trans*-lactone **9** :

<sup>1</sup>H NMR (CDCl<sub>3</sub>, 400 MHz)  
6.23 (d, *J* = 2.4 Hz, 1H), 5.61 (d, *J* = 2.4 Hz, 1H), 4.69 – 4.68 (m, 1H),  
3.65 – 3.62 (t, *J* = 4 Hz, 2H), 3.01 (br. s, 1H), 2.26 – 2.24 (m, 1H), 1.82 (d,  
*J* = 4 Hz, 3H), 1.77 – 1.75 (m, 1H), 1.64 – 1.61 (m, 3H).

<sup>13</sup>C NMR (CDCl<sub>3</sub>, 100 MHz)  
169.5, 137.7, 122.7, 84.9, 75.6, 72.4, 61.9, 46.6, 29.3, 29.0, 3.5.

IR Thin film  
3440, 2929, 2859, 2247, 1761, 1659, 1270.

HRMS ES+: C<sub>11</sub>H<sub>15</sub>O<sub>3</sub> [M+H]<sup>+</sup>  
Calculated: 195.1031. Found: 195.1021.

TLC R<sub>f</sub> = 0.2 (75% Et<sub>2</sub>O/pentane) [silica gel, KMnO<sub>4</sub> stain]

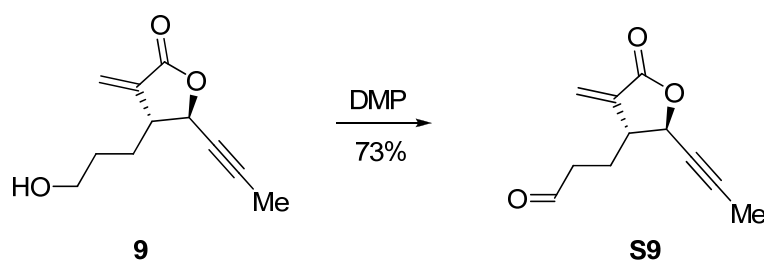

**3-[4-methylene-5-oxo-2-(prop-1-ynyl)tetrahydrofuran-3-yl]propanal (S9):** A flame-dried round bottom flask equipped with a Teflon-coated stir-bar was charged with **9** (130 mg, 0.67 mmol, *trans:cis* 6.5:3.5) and CH<sub>2</sub>Cl<sub>2</sub> (9 mL). The resulting solution was treated with Dess-Martin periodinane (343 mg, 0.8 mmol). The progress of the reaction was monitored by TLC and upon completion (3 h), the mixture was concentrated under reduced pressure. The crude residue was loaded onto a 25 g SNAP column and purified using a Biotage normal phase automated purification system with a gradient of 40–85% Et<sub>2</sub>O/pentane to afford the title compound **S9** (94 mg, 73%) as a slightly yellow oil. The product was obtained as a mixture of isomers in a *trans:cis* 7:3 ratio. A pure fraction of the *trans*-lactone was collected for characterization purposes.

Data for *trans*-lactone **S9** :

|                           |                                                                                                                                                                                                                                                                       |
|---------------------------|-----------------------------------------------------------------------------------------------------------------------------------------------------------------------------------------------------------------------------------------------------------------------|
| <u><sup>1</sup>H NMR</u>  | (CDCl <sub>3</sub> , 400 MHz)<br>9.80 (s, 1H), 6.29 (d, <i>J</i> = 2.4 Hz, 1H), 5.64 (d, <i>J</i> = 2.4 Hz, 1H), 4.67 – 4.66 (m, 1H), 3.06 – 3.04 (m, 1H), 2.64 (t, <i>J</i> = 4.0 Hz, 2H), 2.08 – 2.03 (m, 1H), 1.90 – 1.86 (m, 1H), 1.85(d, <i>J</i> = 2.0 Hz, 3H). |
| <u><sup>13</sup>C NMR</u> | (CDCl <sub>3</sub> , 100 MHz)<br>200.3, 168.8, 137.2, 122.9, 85.4, 75.4, 72.1, 45.9, 40.1, 24.5, 3.6.                                                                                                                                                                 |
| <u>IR</u>                 | Thin film<br>2923, 2850, 2730, 2245, 1769, 1723, 1662, 1447.                                                                                                                                                                                                          |
| <u>HRMS</u>               | ES+: C <sub>11</sub> H <sub>13</sub> O <sub>3</sub> [M+H] <sup>+</sup><br>Calculated: 193.0885. Found: 193.0865.                                                                                                                                                      |
| <u>TLC</u>                | R <sub>f</sub> = 0.6 (85% Et <sub>2</sub> O/pentane) [silica gel, KMnO <sub>4</sub> stain]                                                                                                                                                                            |

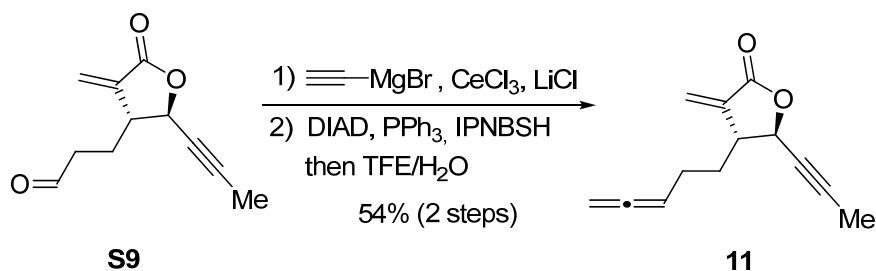

**3-methylene-4-(penta-3,4-dienyl)-5-(prop-1-ynyl)dihydrofuran-2(3*H*)-one (11)** : Lithium chloride (30 mg, 0.71 mmol) and cerium (III) trichloride (anhydrous beads, 88 mg, 0.36 mmol) were added to a flame-dried 25 mL Schlenk tube equipped with a Teflon-coated stir-bar in a glove box. The Schlenk tube was removed from the glove box, THF (2.3 mL) was added, and the suspension was stirred vigorously at rt under nitrogen atmosphere for 13 h. The resulting solution was cooled to 0 °C, treated with ethynyl magnesium bromide (0.5 M in THF, 0.71 mL, 0.36 mmol) and stirred at 0 °C for 1.5 h. A solution of *trans* aldehyde **S9** (46 mg, 0.24 mmol) in THF (1.0 mL with a 0.2 mL rinse) was added and the mixture was stirred at 0 °C for 1 h. The solution was then diluted with saturated ammonium chloride (2 mL) and Et<sub>2</sub>O (6 mL). After stirring for 1 h, the mixture was filtered through a Celite plug and the filter cake was rinsed with Et<sub>2</sub>O (40 mL). The organic phase was separated and the aqueous layer was extracted with Et<sub>2</sub>O (10 mL, 2×). The combined organic layers were washed with brine (10 mL), dried over Na<sub>2</sub>SO<sub>4</sub>, filtered and concentrated under reduced pressure. The propargyl alcohol was not stable to column chromatography, so it was taken on immediately to the next step.

The crude product was then charged into a flame-dried 25 mL round bottom flask equipped with a Teflon-coated stir-bar, followed by PPh<sub>3</sub> (63 mg, 0.24 mmol), *N*-isopropylidene-*N'*-2-nitrobenzenesulfonyl hydrazine (61 mg, 0.24 mmol) and THF (1.4 mL). The resulting solution was cooled to 0 °C, stirred under nitrogen and diisopropylazodicarboxylate (48 mg, 0.24 mmol) was added dropwise. After 5 min, the ice/water bath was removed and the reaction was stirred at rt. The progress of the reaction was monitored by TLC and upon completion (13 h), TFE/H<sub>2</sub>O (1:1, 1.6 mL) was added. After 3 h, the mixture was diluted with pentane/H<sub>2</sub>O (1:1, 8 mL) and extracted with Et<sub>2</sub>O (3×10 mL). The combined organic layers were washed with brine (10 mL), dried over Na<sub>2</sub>SO<sub>4</sub>, filtered and concentrated under reduced pressure. The crude residue was loaded onto a 10 g SNAP column and purified using a Biotage normal phase automated purification system with a gradient of 6–10% Et<sub>2</sub>O/pentane to afford the title compound **11** (22 mg, 54%, 2 steps) as a slightly yellow oil.

<sup>1</sup>H NMR (CDCl<sub>3</sub>, 300 MHz)  
 6.30 (d, *J* = 2.1 Hz, 1H), 5.63 (d, *J* = 2.1 Hz, 1H), 5.16 – 5.11 (m, 1H),  
 4.76 – 4.71 (m, 3H), 3.13 – 3.06 (m, 1H), 2.17 – 2.11 (m, 2H), 1.87 (d, *J* =  
 2.1 Hz, 3H), 1.82 – 1.72 (m, 2H).

<sup>13</sup>C NMR (CDCl<sub>3</sub>, 175 MHz)  
 208.6, 169.3, 137.7, 122.7, 88.7, 84.9, 75.8, 75.7, 72.4, 46.1, 32.3, 24.7,  
 3.7.

IR Thin film  
 2917, 2849, 2250, 1957, 1762, 1665, 1444.

HRMS APCI+: C<sub>13</sub>H<sub>15</sub>O<sub>2</sub> [M+H]<sup>+</sup>  
 Calculated: 203.1072. Found: 203.1097.

TLC R<sub>f</sub> = 0.4 (10% Et<sub>2</sub>O/pentane) [silica gel, KMnO<sub>4</sub> stain]

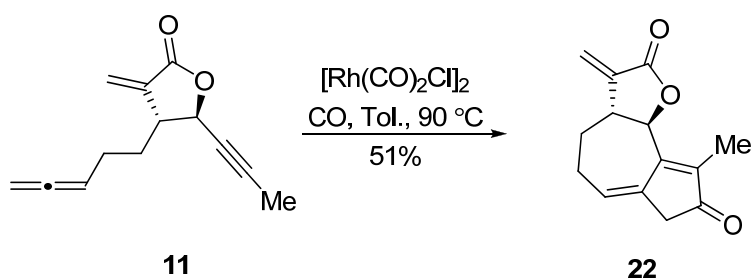

**9-methyl-3-methylene-3,3a,4,5-tetrahydroazuleno[4,5-b]furan-2,8(7H,9bH)-dione (22):**

Following the General Procedure for the  $[\text{Rh}(\text{CO})_2\text{Cl}]_2$  Catalyzed Cyclocarbonylation Reaction, allene-yne **11** (16 mg, 0.08 mmol) and  $[\text{Rh}(\text{CO})_2\text{Cl}]_2$  (3.2 mg,  $8 \times 10^{-3}$  mmol) were reacted in toluene (0.7 mL) for 30 min. Purification of the residue by flash chromatography (75%  $\text{Et}_2\text{O}$ /pentane) afforded the title compound **22** (9.5 mg, 51%) as a slightly yellow oil.

$^1\text{H}$  NMR (CDCl<sub>3</sub>, 300 MHz)  
6.34 (d,  $J = 3.0$  Hz, 1H), 5.83(t,  $J = 6$  Hz, 1H), 5.63 (d,  $J = 3.0$  Hz, 1H),  
5.18 (d,  $J = 9.0$  Hz, 1H), 3.10 – 3.08 (m, 1H), 3.04 (s, 2H), 2.57 – 2.51 (m,  
2H), 2.43 – 2.36 (m, 1H), 1.86 (s, 3H), 1.84 – 1.78 (m, 1H).

$^{13}\text{C}$  NMR (CDCl<sub>3</sub>, 75 MHz)  
204.7, 168.9, 158.6, 140.9, 138.2, 133.5, 124.4, 121.2, 81.1, 44.1, 41.1,  
26.6, 25.9, 9.5.

IR Thin film  
2917, 2847, 1777, 1699, 1658, 1629, 1492, 1258.

MS  $m/z$  (%) 229 (2), 269 (38), 254 (23), 232 (1).

HRMS ESI+: C<sub>14</sub>H<sub>15</sub>O<sub>3</sub> [M+H]<sup>+</sup>  
Calculated: 231.1021. Found: 231.1020.

TLC  $R_f = 0.4$  (80%  $\text{Et}_2\text{O}$ /pentane) [silica gel, UV,  $\text{KMnO}_4$  stain]

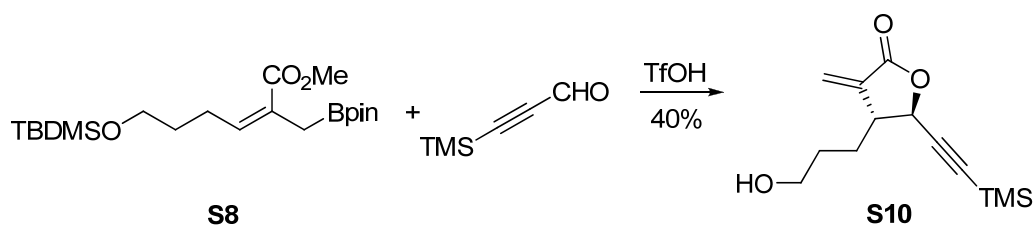

**4-(3-hydroxypropyl)-3-methylene-5-((trimethylsilyl)ethynyl)dihydrofuran-2(3H)-one (S10):**

A flame-dried round bottom flask equipped with a Teflon-coated stir-bar was charged with **S8** (6.13 g, 15.8 mmol,  $E:Z = 2.5:6.5$ ), 3-(trimethylsilyl)propionaldehyde (4 g, 31.5 mmol) and toluene (42 mL) at 0 °C. The resulting solution was treated with trifluoromethanesulfonic acid (237 mg, 1.57 mmol) and stirred at 0 °C under a nitrogen atmosphere for 12 h. The mixture was then diluted with  $\text{NH}_4\text{Cl}$  (aq) :  $\text{NH}_4\text{OH}$  (9:1, v/v, 314 mL) and extracted with  $\text{Et}_2\text{O}$  ( $3 \times 150$  mL). The combined extracts were washed with brine (70 mL), dried over  $\text{Na}_2\text{SO}_4$ , filtered and

concentrated under reduced pressure. The crude residue was loaded onto a 100 g SNAP column and purified using a Biotage normal phase automated purification system with a gradient of 5 – 90% Et<sub>2</sub>O/pentane to afford the title compound **XX** (1.47 g, 40%) as a yellow oil. The product was obtained as a mixture of lactone isomers in a *trans*:*cis* 4:1 ratio. A pure fraction of the *trans*-lactone was collected for characterization purposes.

Data for *trans*-lactone **S10** :

<sup>1</sup>H NMR (CDCl<sub>3</sub>, 300 MHz)  
6.30 (d, *J* = 3.0 Hz, 1H), 5.65(d, *J* = 3 Hz, 1H), 4.73 (d, *J* = 6 Hz, 1H),  
3.72 – 3.71 (m, 2H), 3.14 – 3.10 (m, 1H), 1.87 – 1.83 (m, 1H), 1.71 – 1.68  
(m, 3H), 1.46 – 1.44 (m, 1H), 0.17 (s, 9H).

<sup>13</sup>C NMR (CDCl<sub>3</sub>, 175 MHz)  
169.2, 137.2, 122.8, 93.38, 74.7, 72.0, 61.4, 49.2, 29.2, 28.7, -0.7 (3C).

IR Thin film  
3452, 2953, 1777, 1659, 1405, 1250, 1131, 1066, 988.

HRMS ES+: C<sub>13</sub>H<sub>21</sub>O<sub>3</sub>Si [M+H]<sup>+</sup>  
Calculated: 253.1285. Found: 253.1260.

TLC R<sub>f</sub> = 0.20 (50% Et<sub>2</sub>O/pentane) [silica gel, KMnO<sub>4</sub> stain]

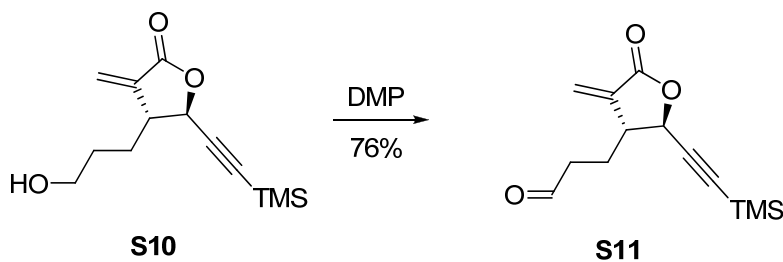

**3-[4-methylene-5-oxo-2-((trimethylsilyl)ethynyl)tetrahydrofuran-3-yl]propanal (S11):** A flame-dried round bottom flask equipped with a Teflon-coated stir-bar was charged with **S10** (571 mg, 2.40 mmol, *trans*:*cis* 7.5:2.5) and CH<sub>2</sub>Cl<sub>2</sub> (34 mL). The resulting solution was treated with Dess-Martin periodinane (1.22 g, 2.87 mmol). The progress of the reaction was monitored by TLC and upon completion (3 h), the mixture was concentrated under reduced pressure. The crude residue was loaded onto a 25 g SNAP column and purified using a Biotage normal phase automated purification system with a gradient of 40 – 60% Et<sub>2</sub>O/pentane to afford the *trans*-

lactone isomer **S11** (40 mg, 7%) and a mixture of isomers (393 mg, 69%) in a *trans:cis* 7:3 ratio as a slightly yellow oils.

Data for *trans*-lactone **S11** :

<sup>1</sup>H NMR (CDCl<sub>3</sub>, 400 MHz)  
9.82 (br s, 1H), 6.32 (d, *J* = 2.4 Hz, 1H), 5.64 (d, *J* = 2.4 Hz, 1H), 4.69 – 4.68 (m, 1H), 3.15 – 3.10 (m, 1H), 2.67 (t, *J* = 7.4 Hz, 2H), 2.13 – 2.08 (m, 1H), 1.90 – 1.85 (m, 1H), 0.17 (s, 9H).

<sup>13</sup>C NMR (CDCl<sub>3</sub>, 175 MHz)  
200.1, 168.4, 136.7, 122.8, 100.5, 93.8, 71.5, 45.6, 39.9, 24.2, -0.7 (3C).

IR Thin film  
2966, 2897, 2190, 1764, 1712, 1667, 1417, 1332, 1275, 1131.

HRMS ES+: C<sub>13</sub>H<sub>19</sub>O<sub>3</sub>Si [M+H]<sup>+</sup>  
Calculated: 251.1125. Found: 251.1103.

TLC R<sub>f</sub> = 0.9 (85% Et<sub>2</sub>O/pentane) [silica gel, KMnO<sub>4</sub> stain]

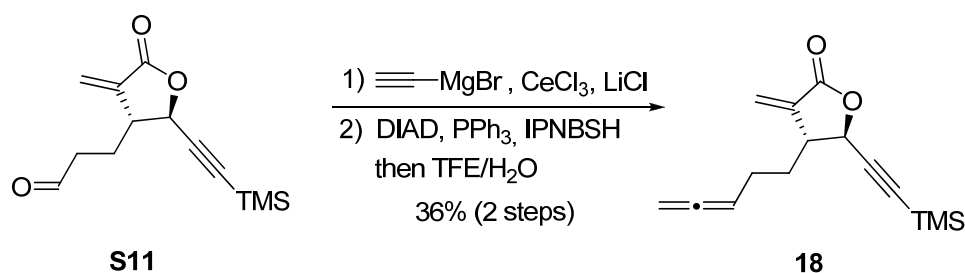

**3-methylene-4-(penta-3,4-dienyl)-5-((trimethylsilyl)ethynyl)dihydrofuran-2(3H)-one (18):**

Lithium chloride (90 mg, 2.12 mmol) and cerium (III) trichloride (anhydrous beads, 261 mg, 1.06 mmol) were added to a flame-dried 50 mL Schlenk tube equipped with a Teflon-coated stir-bar in a glove box. The Schlenk tube was removed from the glove box, THF (6.5 mL) was added, and the suspension was stirred vigorously at rt under nitrogen atmosphere for 12 h. The resulting solution was cooled to 0 °C, treated with ethynyl magnesium bromide (0.5 M in THF, 2.12 mL, 1.06 mmol) and stirred at 0 °C for 1.5 h. A solution of aldehyde **S11** (167 mg, 0.71 mmol, *trans:cis* 3:7) in THF (6.5 mL with a 1.5 mL rinse) was added and the mixture was stirred at 0 °C for 1 h. The solution was then diluted with saturated ammonium chloride (10 mL) and Et<sub>2</sub>O (40 mL). After stirring for 1 h, the mixture was filtered through a Celite plug and the filter

cake was rinsed with Et<sub>2</sub>O (40 mL). The organic phase was separated and the aqueous layer was extracted with Et<sub>2</sub>O (10 mL, 2×). The combined organic layers were washed with brine (20 mL), dried over Na<sub>2</sub>SO<sub>4</sub>, filtered and concentrated under reduced pressure. The propargyl alcohol was not stable to column chromatography, so it was taken on immediately to the next step.

The crude product was then charged into a flame-dried 50 mL round bottom flask equipped with a Teflon-coated stir-bar, followed by PPh<sub>3</sub> (229 mg, 0.87 mmol), *N*-isopropylidene-*N'*-2-nitrobenzenesulfonyl hydrazine (220 mg, 0.87 mmol) and THF (12.3 mL). The resulting solution was cooled to 0 °C, stirred under nitrogen and diisopropylazodicarboxylate (17.6 mg, 0.87 mmol) was added dropwise. After 5 min, the ice/water bath was removed and the reaction was stirred at rt. The progress of the reaction was monitored by TLC and upon completion (13 h), TFE/H<sub>2</sub>O (1:1, 5.5 mL) was added. After 3 h, the mixture was diluted with pentane/H<sub>2</sub>O (1:1, 50 mL) and extracted with Et<sub>2</sub>O (3×40 mL). The combined organic layers were washed with brine (10 mL), dried over Na<sub>2</sub>SO<sub>4</sub>, filtered and concentrated under reduced pressure. The crude residue was loaded onto a 25 g SNAP column and purified using a Biotage normal phase automated purification system with a gradient of 4 – 8% Et<sub>2</sub>O/pentane to afford the title compound **18** (65.2 mg, 36%, 2 steps) as a slightly yellow oil. The product was obtained as a mixture of isomers in a *trans*:*cis* 3:7 ratio. A pure fraction of the *trans*-lactone was collected for characterization purposes.

Data for *trans*-lactone **18** :

<sup>1</sup>H NMR (CDCl<sub>3</sub>, 400 MHz)  
6.28 (d, *J* = 2.4 Hz, 1H), 5.63 (d, *J* = 2.4 Hz, 1H), 5.13 (m, 1H), 4.73 – 4.71 (m, 3H), 3.15 – 3.12 (m, 1H), 2.15 – 2.11 (m, 2H), 1.84 – 1.70 (m, 2H), 0.16 (s, 9H).

<sup>13</sup>C NMR (CDCl<sub>3</sub>, 175 MHz)  
208.6, 169.0, 137.3, 122.9, 101.0, 93.5, 88.6, 75.9, 72.0, 45.9, 32.3, 24.5, -0.5 (3C).

IR Thin film  
2958, 2925, 2852, 1957, 1773, 1667, 1446, 1409, 1303, 1250, 1140, 1250, 841.

HRMS ES+: C<sub>15</sub>H<sub>21</sub>O<sub>2</sub>Si [M+H]<sup>+</sup>  
Calculated: 261.1325. Found: 261.1311.

TLC

$R_f = 0.7$  (10% Et<sub>2</sub>O/pentane) [silica gel, KMnO<sub>4</sub> stain]

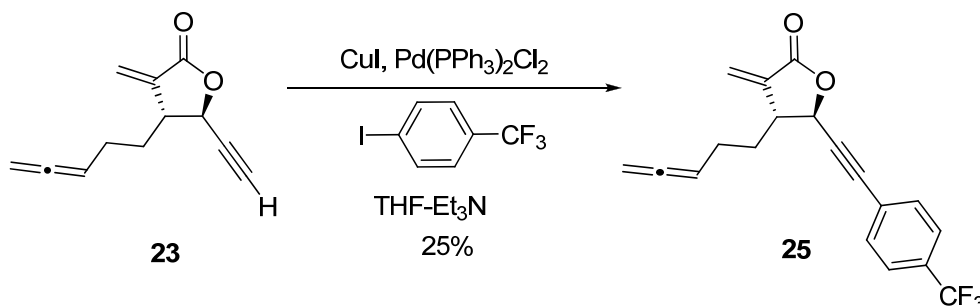

**3-methylene-4-(penta-3,4-dienyl)-5-((4-(trifluoromethyl)phenyl)ethynyl)dihydrofuran-**

**2(3*H*)-one (25)** : For the preparation of compound **25**, slight modifications were made to a literature procedure.<sup>5</sup> THF (1.9 mL) and triethylamine (1.3 mL) were placed in a 4 mL vial fitted with a septa cap under an argon atmosphere. The vial was degassed by placing a needle into the solution and bubbling N<sub>2</sub> through for 15 min. The resulting solution was added to a 10 mL round bottom flask containing allene **23** (44 mg, 0.253 mmol) and 1-iodo-4-(trifluoromethyl)benzene (103 mg, 0.379 mmol). The resulting solution was transferred to a 4 mL vial fitted with a septa cap containing [PdCl<sub>2</sub>(PPh<sub>3</sub>)<sub>2</sub>] (7 mg, 0.010 mmol, 4 mol %) and CuI (3.9 mg, 0.020 mmol, 8 mol %). The mixture was degassed for 5 min, stirred at room temperature for 8 h and concentrated under reduced pressure. The crude residue was loaded onto a 10 g SNAP column and purified using a Biotage normal phase automated purification system with a gradient of 5 – 12% Et<sub>2</sub>O/pentane to afford the title compound **25** (20.6 mg, 25%) as a colorless oil.

<sup>1</sup>H NMR

(CDCl<sub>3</sub>, 300 MHz)

7.61 – 7.53 (m, 4H), 6.36 (d, *J* = 2.4 Hz, 1H), 5.71 (d, *J* = 2.4 Hz, 1H), 5.19 – 5.14 (m, 1H), 5.01 (d, *J* = 5.1 Hz, 1H), 4.76 – 4.72 (m, 2H), 3.30 – 3.26 (m, 1H), 2.22 – 2.19 (m, 2H), 1.88 – 1.81 (m, 2H).

<sup>13</sup>C NMR

(CDCl<sub>3</sub>, 175 MHz)

208.6, 168.9, 137.1, 132.0 (4C), 130.7 (q, <sup>2</sup>*J*<sub>C-F</sub> = 33.3 Hz), 125.22 (q, <sup>1</sup>*J*<sub>C-F</sub> = 3.5 Hz), 124.4, 123.2, 88.5, 87.4, 86.2, 75.8, 72.0, 45.9, 32.3, 24.6.

IR

Thin film

2921, 2852, 1952, 1777, 1670, 1614, 1442, 1409, 1323, 1262, 1127.

<sup>2</sup> M. Gruit, D. Michalik, K. Krüger, A. Spannenberg, A. Tillack, A. Pews-Davtyan, M. Beller, *Tetrahedron* **2010**, 66, 3341-3352.



HRMS

ES+: C<sub>19</sub>H<sub>16</sub>O<sub>2</sub>F<sub>3</sub> [M+H]<sup>+</sup>

Calculated: 333.1102. Found: 333.1100.

TLC

R<sub>f</sub> = 0.4 (25% Et<sub>2</sub>O/pentane) [silica gel, UV]

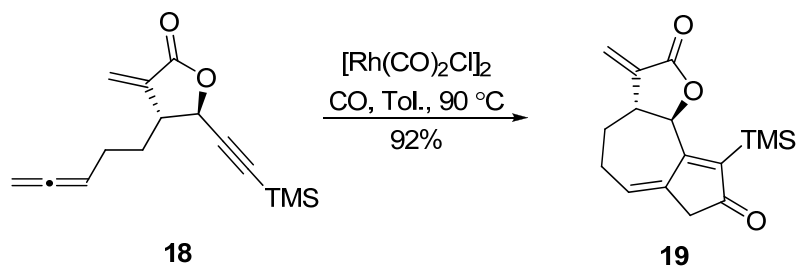

**3-methylene-9-(trimethylsilyl)-3,3a,4,5-tetrahydroazuleno[4,5-b]furan-2,8(7H,9bH)-dione**

**(19)** : Following the General Procedure for the [Rh(CO)<sub>2</sub>Cl]<sub>2</sub> Catalyzed Cyclocarbonylation Reaction, allene-yne **18** (16 mg, 0.06 mmol) and [Rh(CO)<sub>2</sub>Cl]<sub>2</sub> (2.4 mg, 6 × 10<sup>-3</sup> mmol) were reacted in toluene (1.7 mL) for 20 min. Purification of the residue by flash chromatography (80% Et<sub>2</sub>O/pentane) afforded the title compound **19** (16.5 mg, 92%) as a slightly yellow oil.

<sup>1</sup>H NMR

(CDCl<sub>3</sub>, 300 MHz)

6.32 (d, *J* = 3.0 Hz, 1H), 5.90 (t, *J* = 6 Hz, 1H), 5.60 (d, *J* = 3.0 Hz, 1H), 5.15 (d, *J* = 10.0 Hz, 1H), 3.03 (m, 3H), 2.53 (m, 2H), 2.39 (m, 1H), 1.85 (m, 1H), 0.32 (s, 9H).

<sup>13</sup>C NMR

(CDCl<sub>3</sub>, 175 MHz)

207.7, 173.2, 168.3, 144.7, 138.7, 136.5, 124.8, 120.9, 80.1, 43.9, 42.6, 26.2, 25.4, 0.5 (3C).

IR

Thin film

2950, 2247, 1769, 1695, 1540, 1458, 1397, 1303, 1258, 1140, 1095, 1017.

HRMS

ES+: C<sub>16</sub>H<sub>21</sub>O<sub>3</sub>Si [M+H]<sup>+</sup>

Calculated: 289.1260. Found: 289.1231.

TLC

R<sub>f</sub> = 0.6 (80% Et<sub>2</sub>O/pentane) [silica gel, KMnO<sub>4</sub> stain]

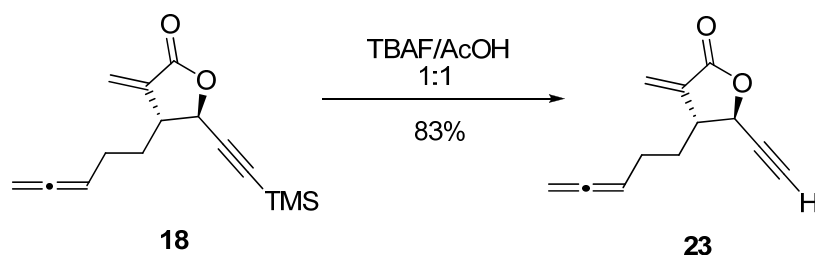

**5-ethynyl-3-methylene-4-(penta-3,4-dienyl)dihydrofuran-2(3H)-one (23)** : A solution of tetrabutylammonium fluoride (52 mg, 0.197 mmol) and glacial acetic acid (11  $\mu\text{L}$ , 0.197 mmol) in THF (1 mL) was stirred for 30 min under argon. The mixture was then added to a solution of allene-yne **18** (34 mg, 0.132 mmol) in THF (1 mL). After stirring 1 h at room temperature, the solution was concentrated under reduced pressure. Purification of the residue by flash chromatography (10% Et<sub>2</sub>O/pentane) afforded the title compound **23** (20 mg, 83%) as a slightly yellowish oil.

<sup>1</sup>H NMR (CDCl<sub>3</sub>, 300 MHz)  
 6.32 (d, *J* = 2.7 Hz, 1H), 5.66 (d, *J* = 2.7 Hz, 1H), 5.12 (m, 1H), 4.75 (m, 3H), 3.21 – 3.14 (m, 1H), 2.65 (s, 1H), 2.18 – 2.14 (m, 2H), 1.84 – 1.72 (m, 2H).

<sup>13</sup>C NMR (CDCl<sub>3</sub>, 175 MHz)  
 208.6, 169.0, 137.2, 123.0, 89.1, 80.0, 76.2, 75.3, 71.4, 46.5, 32.5, 25.4.

IR Thin film  
 3285, 2921, 2856, 2124, 1961, 1777, 1667, 1262, 1107, 968.

HRMS ES+: C<sub>12</sub>H<sub>13</sub>O<sub>2</sub> [M+H]<sup>+</sup>  
 Calculated: 189.0909. Found: 189.0916.

TLC R<sub>f</sub>=0.8 (20% Et<sub>2</sub>O/pentane) [silica gel, KMnO<sub>4</sub> stain]

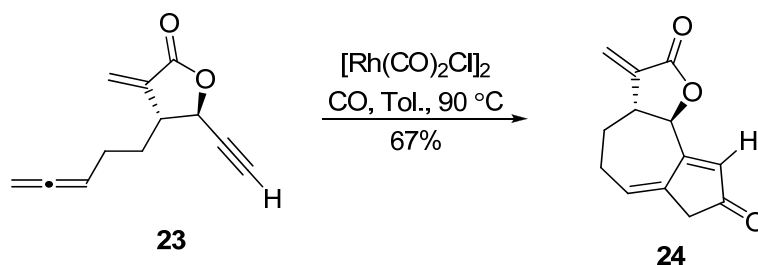

**3-methylene-3,3a,4,5-tetrahydroazuleno[4,5-b]furan-2,8(7H,9bH)-dione (24):** Following the General Procedure for the  $[\text{Rh}(\text{CO})_2\text{Cl}]_2$  Catalyzed Cyclocarbonylation Reaction, allene-yne **23** (18.8 mg, 0.11 mmol) and  $[\text{Rh}(\text{CO})_2\text{Cl}]_2$  (4.2 mg, 0.011 mmol) were reacted in toluene (2.9 mL) for 30 min. Purification of the residue by flash chromatography (70%  $\text{Et}_2\text{O}$ /pentane) afforded the title compound **24** (15.5 mg, 67%) as a colorless oil.

$^1\text{H}$  NMR (CDCl<sub>3</sub>, 300 MHz)  
 6.24 (s, 1H), 6.34 (d,  $J = 3.0$  Hz, 1H), 5.95 (t,  $J = 6$  Hz, 1H), 5.62 (d,  $J = 3.0$  Hz, 1H), 5.05 (d,  $J = 10.0$  Hz, 1H), 3.09 – 2.99 (m, 3H), 2.61 – 2.56 (m, 2H), 2.43 – 2.37 (m, 1H), 1.90 – 1.82 (m, 1H).

$^{13}\text{C}$  NMR (CDCl<sub>3</sub>, 175 MHz)  
 203.8, 168.7, 167.5, 138.4, 134.1, 129.5, 127.4, 121.4, 79.7, 43.6, 41.8, 26.3, 26.1.

IR Thin film  
 2950, 2917, 2860, 1769, 1708, 1585, 1405, 1381, 1258, 1242, 1136, 1087.

HRMS ES+: C<sub>13</sub>H<sub>13</sub>O<sub>3</sub> [M+H]<sup>+</sup>  
 Calculated: 217.0865. Found: 217.0858.

TLC R<sub>f</sub> = 0.2 (70%  $\text{Et}_2\text{O}$ /pentane) [silica gel, KMnO<sub>4</sub> stain]

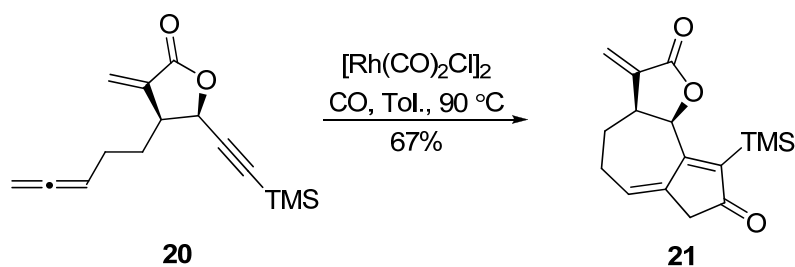

**3-methylene-9-(trimethylsilyl)-3,3a,4,5-tetrahydroazuleno[4,5-b]furan-2,8(7H,9bH)-dione (21) :** Following the General Procedure for the  $[\text{Rh}(\text{CO})_2\text{Cl}]_2$  Catalyzed Cyclocarbonylation Reaction, allene-yne **20** (13.3 mg, 0.055 mmol) and  $[\text{Rh}(\text{CO})_2\text{Cl}]_2$  (2.2 mg, 0.056 mmol) were reacted in toluene (1.5 mL) for 150 min. Purification of the residue by flash chromatography (50%  $\text{Et}_2\text{O}$ /pentane) afforded the title compound **21** (9.9 mg, 67%) as a slightly yellowish oil.

$^1\text{H}$  NMR (CDCl<sub>3</sub>, 400 MHz)  
 6.43 (d,  $J = 1.7$  Hz, 1H), 5.98 (t,  $J = 6$  Hz, 1H), 5.75 (d,  $J = 1.7$  Hz, 1H), 5.65 (d,  $J = 7.2$  Hz, 1H), 3.52 – 3.49 (m, 1H), 3.18 (d,  $J = 20.8$  Hz, 1H),

2.97 (d,  $J = 20.8$  Hz, 1H), 2.30 – 2.29 (m, 2H), 2.10 – 2.06 (m, 1H), 1.99 – 1.95 (m, 1H), 0.87 (s, 9H).

$^{13}\text{C}$  NMR

( $\text{CDCl}_3$ , 175 MHz)

208.4, 169.6, 169.5, 150.4, 138.9, 136.2, 128.6, 123.7, 77.9, 43.9, 42.1, 33.9, 24.8, -0.3 (3C).

IR

Thin film

2950, 2247, 1769, 1695, 1540, 1458, 1397, 1303, 1258, 1140, 1095, 1017.

HRMS

ES+:  $\text{C}_{16}\text{H}_{21}\text{O}_3\text{Si}$   $[\text{M}+\text{H}]^+$

Calculated: 289.1260. Found: 289.1241.

TLC

$R_f = 0.7$  (80%  $\text{Et}_2\text{O}$ /pentane) [silica gel,  $\text{KMnO}_4$  stain]

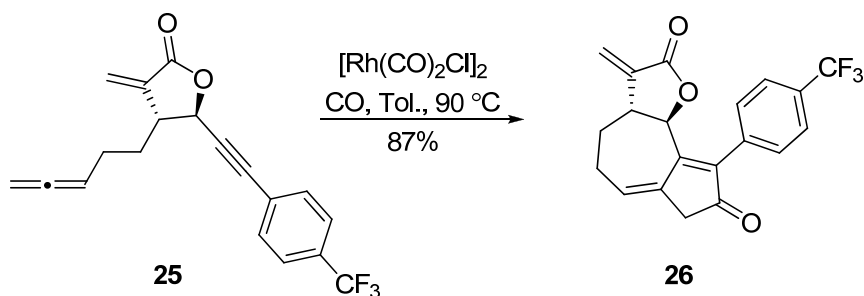

**3-methylene-9-(4-(trifluoromethyl)phenyl)-3,3a,4,5-tetrahydroazuleno[4,5-*b*]furan-2,8**

**(7*H*,9*bH*)-dione (25)** : Following the General Procedure for the  $[\text{Rh}(\text{CO})_2\text{Cl}]_2$  Catalyzed Cyclocarbonylation Reaction, allene-yne **25** (15 mg, 0.045 mmol) and  $[\text{Rh}(\text{CO})_2\text{Cl}]_2$  (1.8 mg, 0.045 mmol) were reacted in toluene (1.3 mL) for 30 min. Purification of the residue by flash chromatography (80%  $\text{Et}_2\text{O}$ /pentane) afforded the title compound **26** (14 mg, 87%) as a slightly yellowish oil.

$^1\text{H}$  NMR

( $\text{CDCl}_3$ , 500 MHz)

7.64 (d,  $J = 8$  Hz, 2H), 7.38 (d,  $J = 8$  Hz, 2H), 6.29 (d,  $J = 3.0$  Hz, 1H), 6.07 (t,  $J = 6$  Hz, 1H), 5.60 (d,  $J = 3.0$  Hz, 1H), 5.34 (d,  $J = 10.0$  Hz, 1H), 3.25 (s, 2H), 3.17 – 3.14 (m, 1H), 2.64 – 2.61 (m, 2H), 2.45 – 2.40 (m, 1H), 1.93 – 1.86 (m, 1H).

$^{13}\text{C}$  NMR

( $\text{CDCl}_3$ , 175 MHz)

202.2, 168.0, 160.8, 141.4, 138.1, 134.6, 133.8, 130.2 (4C), 130.1 (q,  $^2J_{C-F}$   
= 15 Hz), 127.7, 124.4 (q,  $^1J_{C-F}$  = 3.5 Hz), 121.4, 79.7, 44.1, 41.7, 26.5,  
25.8.

IR

Thin film

2967, 2921, 2079, 2009, 1777, 1703, 1523, 1319, 1262, 1172, 1123.

HRMS

ES+:  $C_{20}H_{16}O_3F_3$  [M+H]<sup>+</sup>

Calculated: 361.1052. Found: 361.1042.

TLC

$R_f$  = 0.4 (80% Et<sub>2</sub>O/pentane) [silica gel, UV]

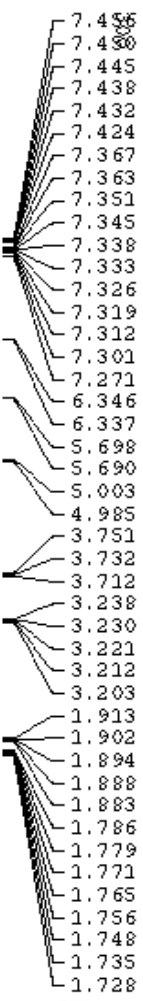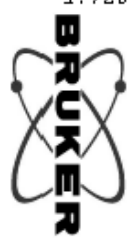

Current Data Parameters  
 NAME CR-11-COH 1202  
 EXPNO 2  
 PROCNO 1

F2 - Acquisition Parameters  
 Date\_ 20100710  
 Time 10.45  
 INSTRUM spect  
 PRORND 5 mm HML 400-1  
 PULPROG zg  
 TD 32768  
 SOLVENT CDCl3  
 NS 16  
 DS 2  
 SWH 6172.839 MHz  
 FIDRES 0.188380 MHz  
 AQ 2.6542580 sec  
 RG 90.5  
 RW 81.000 vsec  
 IE 6.00 vsec  
 TE 293.2 K  
 D1 2.00000000 sec  
 D10 1

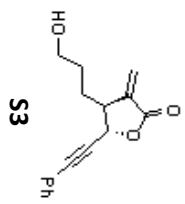

==== CHANNEL f1 =====  
 NUCl 1H  
 P1 5.00 vsec  
 PL1 4.00 dB  
 ST01 300.1418531 MHz

F2 - Processing parameters  
 SI 16384  
 SF 300.1400022 MHz  
 WDW EM  
 SSB 0  
 LB 0.10 HZ  
 GB 0  
 PC 1.00

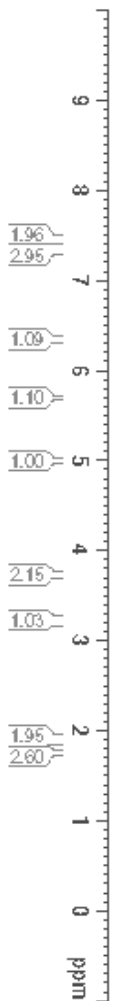

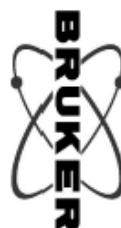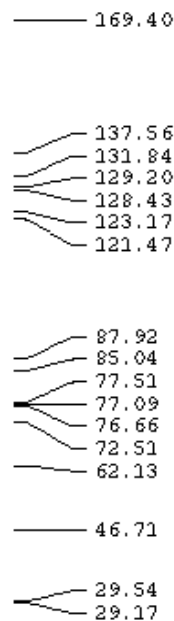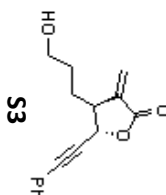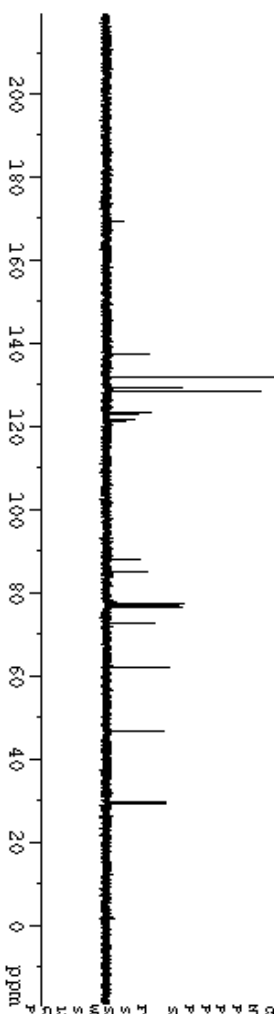

Current Data Parameters  
 NAME CR-II-C08 t12ms  
 EXPNO 3  
 PROCNO 1

F2 - Acquisition Parameters

Date\_ 20100710  
 Time 10.52  
 INSTRUM spect  
 PRGRND 5 mm hsq1hsvcl  
 PULPROG zgpg30  
 ID 32768  
 SOLVENT CDCl3  
 NS 45  
 DS 2  
 SWH 17985.611 MHz  
 FIDRES 0.549877 MHz  
 AQ 0.9110004 sec  
 KC 6502  
 LW 27.800 vsec  
 TB 6.00 vsec  
 B1 2931.2 K  
 B11 6.00000000 sec  
 B12 0.03000000 sec  
 DELTA 5.90000010 sec  
 TD 1

===== CHANNEL f1 =====  
 NUCl 13C  
 P1 5.00 vsec  
 PL1 0.00 dB  
 SF01 75.4778106 MHz

===== CHANNEL f2 =====  
 CPDPRG2 waltz16  
 NUCl2 1H  
 P12 100.00 vsec  
 PL2 4.00 dB  
 PL12 22.98 dB  
 PL13 120.00 dB  
 SF02 300.1412006 MHz

F2 - Processing parameters  
 SI 32768  
 SF 75.4702630 MHz  
 WDW EM  
 SSB 0  
 GB 0  
 BBE 1.00 MHz  
 CB 0  
 PC 1.40

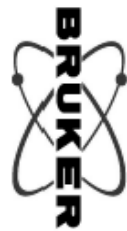

- 169.97
- 137.45
- 131.84
- 129.24
- 128.46
- 122.74
- 121.40
- 89.80
- 82.22
- 77.65
- 77.22
- 76.80
- 71.73
- 62.27
- 43.00
- 26.52
- 26.29

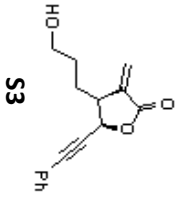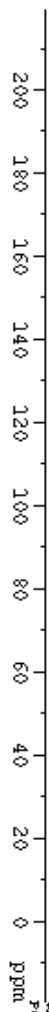

```

Current Data Parameters
NAME      CR-II-171
EXPTNO   1
PROCNO   1

F2 - Acquisition Parameters
Date_    20100709
Time     13.32
INSTRUM spect
PROBHD   5 mm 1H/13
PULPROG zgpg30
TD        32768
SOLVENT  CDCl3
NS        72
DS        2
SFO      17985.611 MHz
FIDRES   0.548877 MHz
AQ        0.9110004 sec
RG        10921.3
BW        27.900 MHz
DE        6.00 MHz
TE        295.2 K
D1        6.00000000 sec
d11       0.03000000 sec
DELTA    5.90000010 sec
TD0       1

===== ORGANEZ EI =====
NUC01     13C
P1         5.00 MHz
P11        0.00 MHz
SFO1       75.4778106 MHz

===== ORGANEZ F2 =====
CPDPRG2   waltz16
NUC02     1H
PCPD2     100.00 MHz
P12        4.00 MHz
P112       22.98 MHz
P113       120.00 MHz
SFO2       300.1412006 MHz

F2 - Processing parameters
SI         32768
SF         75.4702530 MHz
WDW        RM
SSB        0
GB         0
CB         1.00 MHz
PC         1.40
    
```



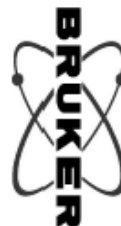

- 7.424
- 7.418
- 7.399
- 7.392
- 7.316
- 7.310
- 7.303
- 7.290
- 7.287
- 7.284
- 6.284
- 6.274
- 5.633
- 5.624
- 5.478
- 5.452
- 3.717
- 3.702
- 3.697
- 3.682
- 3.677
- 3.661
- 3.656
- 3.641
- 3.228
- 3.212
- 3.203
- 3.194
- 3.188
- 3.179
- 3.170
- 3.154
- 3.145
- 2.914
- 1.911
- 1.883
- 1.859
- 1.735
- 1.724
- 1.713
- 1.703
- 1.692

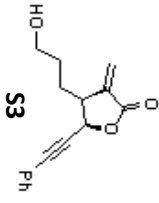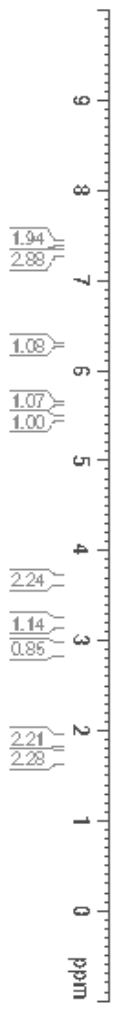

Current Data Parameters  
 NAME OR-11-171  
 EXPNO 1  
 PROCNO 1

F2 - Acquisition Parameters  
 Date\_ 20100709  
 Time 13:21  
 INSTRUM spect  
 PROBRD 5 mm TMAZ vnmr1  
 PULPROG zg  
 ID 32748  
 SOLVENT CDCl3  
 NS 14  
 DS 2  
 SWH 6172.939 MHz  
 FIDRES 0.189380 MHz  
 AQ 2.6592580 sec  
 RG 28.5  
 RW 81.000 vsec  
 IE 6.00 vsec  
 TE 295.2 K  
 D1 2.00000000 sec  
 D11 1

===== CHANNEL f1 =====  
 NUC1 1H  
 P1 5.00 vsec  
 PL1 4.00 dB  
 STQ1 300.1418531 kHz  
 F2 - Processing parameters  
 SI 16384  
 SF 300.1400000 kHz  
 WDW EM  
 SSB 0  
 LB 0.10 Hz  
 GB 0  
 PC 1.00

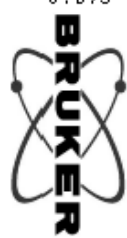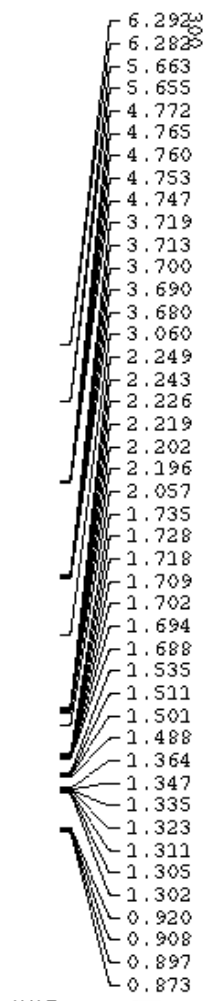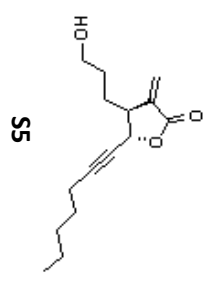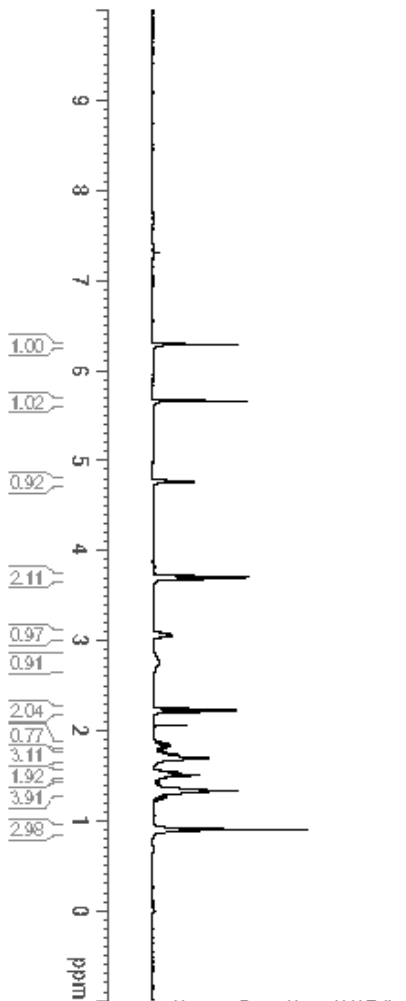

Current Data Parameters  
 NAME CR-11-192  
 EXPNO 1  
 PROCNO 1

F2 - Acquisition Parameters  
 Date\_ 20100730  
 Time 14.18  
 INSTRUM spect  
 PROBRD 5 mm TAI vpro-1  
 PULPROG zg  
 TD 32768  
 SOLVENT CDCl3  
 NS 16  
 DS 2  
 SWH 6172.839 Hz  
 FIDRES 0.188380 Hz  
 AQ 2.6542580 sec  
 RG 32  
 RW 81.000 vsec  
 IE 6.00 vsec  
 TE 295.2 K  
 D1 2.00000000 sec  
 D10 1

==== CHANNEL f1 ====  
 NUCl 1H  
 P1 5.00 vsec  
 PL1 4.00 dB  
 SFO1 300.1418531 MHz  
 F2 - Processing parameters  
 SI 16384  
 SF 300.1399903 MHz  
 WDW EM  
 SSB 0  
 LB 0.10 Hz  
 GB 0  
 PC 1.00

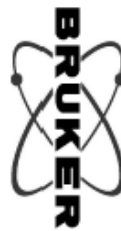

- 169.65
- 137.91
- 122.72
- 89.50
- 77.55
- 77.12
- 76.70
- 76.55
- 72.65
- 61.99
- 46.87
- 30.94
- 29.37
- 29.12
- 27.87
- 22.09
- 18.64
- 13.92

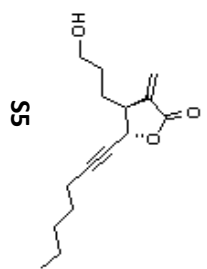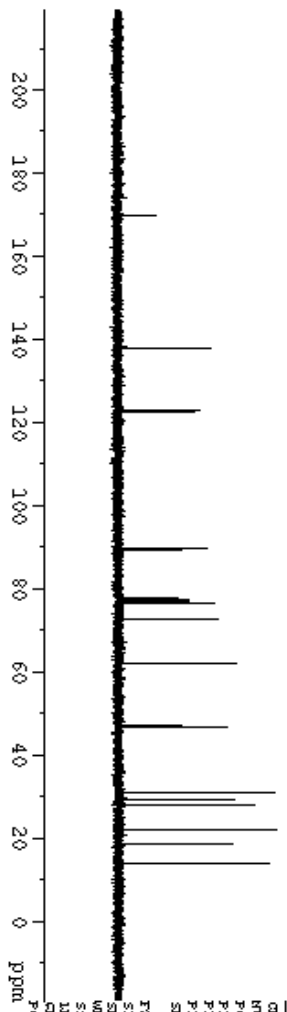

```

Current Data Parameters
NAME      CR-II-192
EXPTNO   1
PROCNO   1

F2 - Acquisition Parameters
Date_    20100730
Time     14.23
INSTRUM spect
PROBHD   5 mm 1H/13C/1
PULPROG zgpg30
TD       32768
SOLVENT  CDCl3
NS       35
DS       2
SWH      17985.611 Hz
FIDRES   0.549877 Hz
AQ       0.9110004 sec
RG       10321.3
LW       27.900 usec
DE       6.00 usec
TE       295.2 K
D1       6.00000000 sec
d11      0.03000000 sec
DELTA    5.90000010 sec
TD0      1

===== CHANNEL f1 =====
NUC1      13C
P1       5.00 usec
P11      0.00 dB
SFO1     75.4778106 MHz

===== CHANNEL f2 =====
NAME      waltz16
PROG2     100.00 usec
PCPD2     4.00 dB
P12      22.98 dB
P112     120.00 dB
SFO2     300.1412006 MHz

F2 - Processing parameters
SI        32768
SF       75.4702530 MHz
WDW       RM
SSB       0
SFB       1.00 Hz
GB        0
PC        1.40
    
```

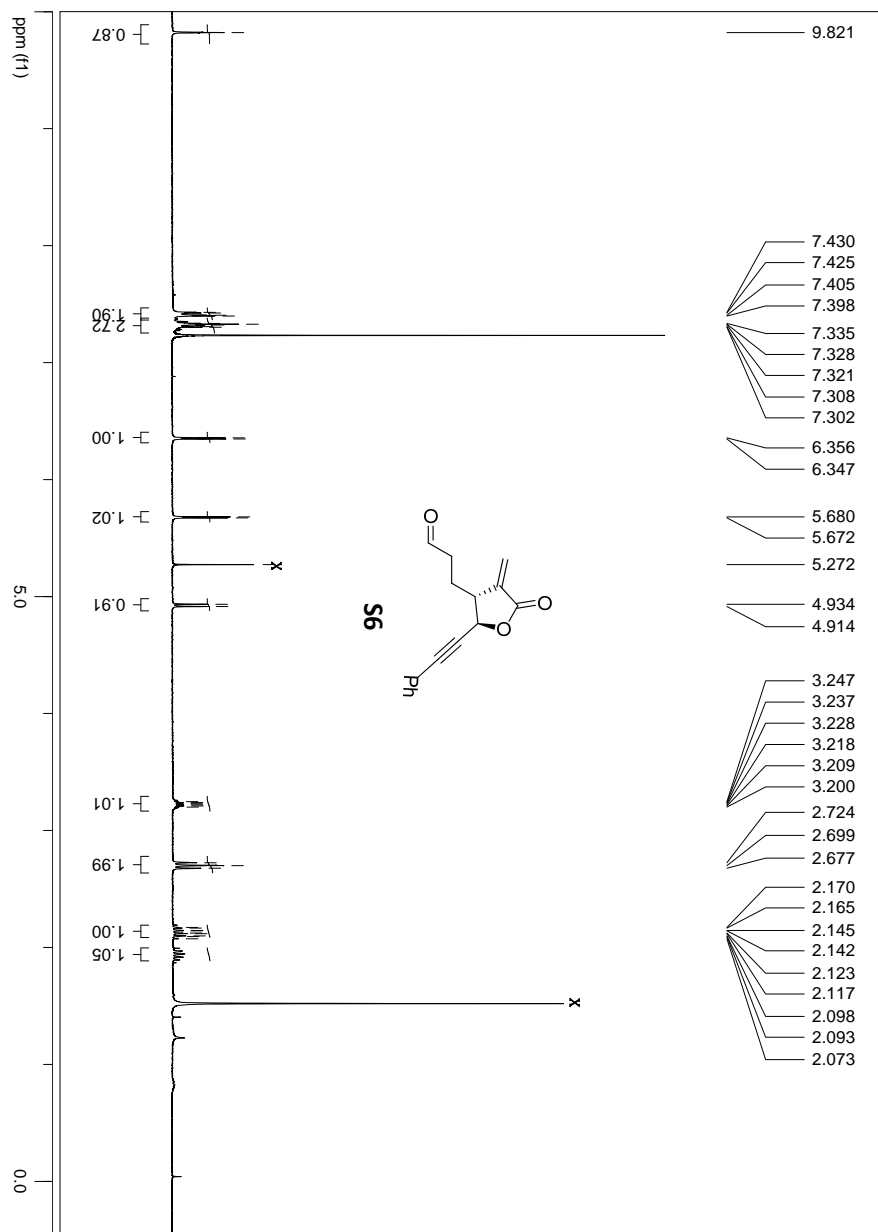

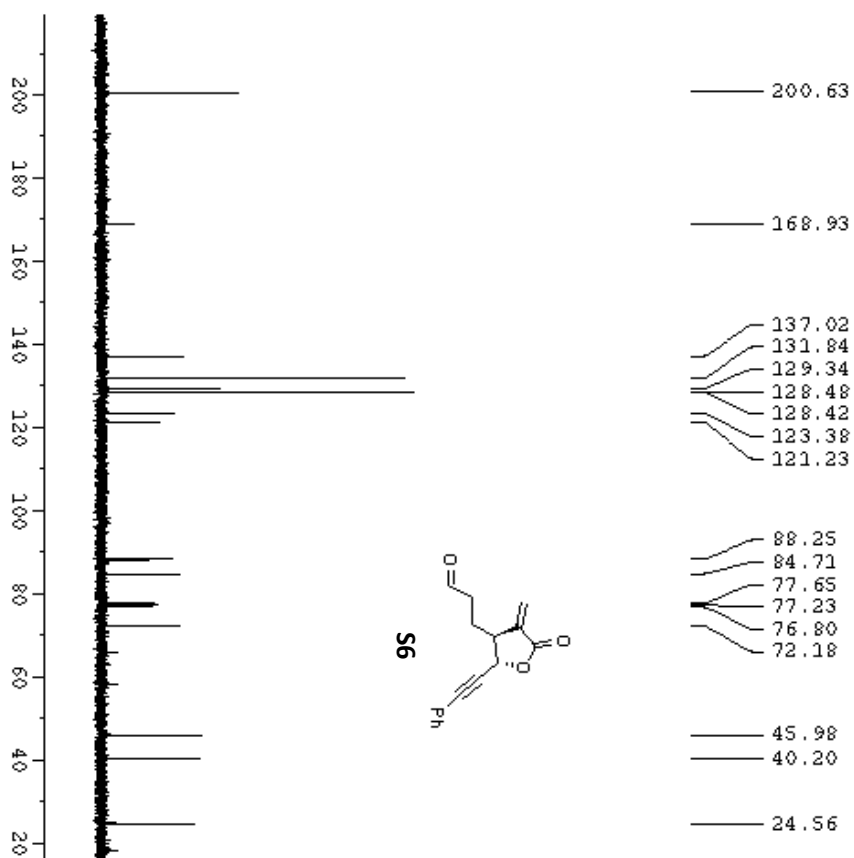

|        |
|--------|
| 200.63 |
| 168.93 |
| 137.02 |
| 131.84 |
| 129.34 |
| 128.48 |
| 128.42 |
| 123.38 |
| 121.23 |
| 88.25  |
| 84.71  |
| 77.65  |
| 77.23  |
| 76.80  |
| 72.18  |
| 45.98  |
| 40.20  |
| 24.56  |

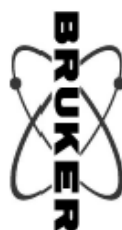

Current Data Parameters  
 NAME CR-11-CHO 12002  
 EXPTNO 2  
 PROCNO 1

F2 - Acquisition Parameters

Date\_ 20100710  
 Time 10.59  
 INSTRUM spect  
 PROBRD 5 mm 1H/13C QNP  
 PULPROG zgpg30  
 TD 32768  
 CPDPRG2 cpdprg2  
 SOLVENT DMS  
 NS 15  
 DS 2  
 SFO8 17985.611 Hz  
 FIDRES 0.548877 Hz  
 AQ 0.9110004 sec  
 RG 9195.2  
 RW 27.800 vsec  
 ZE 6.00 vsec  
 DE 295.2 K  
 D1 6.00000000 sec  
 d11 0.03000000 sec  
 DELTA 5.90000010 sec  
 DP0 1

===== CHANNEL f1 =====  
 NUC1 13C  
 P1 5.00 vsec  
 PL1 0.00 dB  
 SFO1 75.4778106 MHz

===== CHANNEL f2 =====  
 CPDPRG2 waltz16  
 NUC2 1H  
 P2 100.00 vsec  
 PL2 4.00 dB  
 PL12 22.98 dB  
 PL13 120.00 dB  
 SFO2 300.1412006 MHz

F2 - Processing parameters  
 SI 32768  
 SF 75.4702630 MHz  
 WSW 31  
 SSB 0  
 GB 0  
 CB 0  
 PC 1.40

300

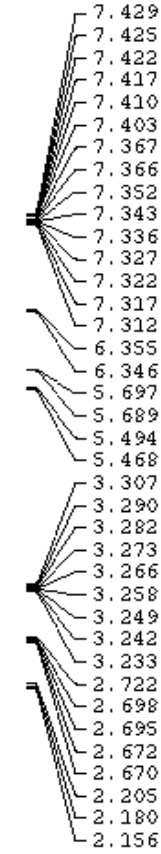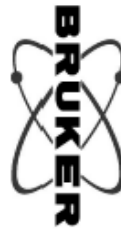

Current Data Parameters  
 NAME CR-11-154  
 EXPNO 2  
 PROCNO 1

F2 - Acquisition Parameters  
 Date\_ 20100709  
 Time 16.45  
 INSTRUM spect  
 PRORND 5 mm HML kmw-cl  
 PULPROG zg  
 TD 32768  
 SOLVENT CDCl3  
 NS 16  
 DS 2  
 SWH 6172.839 Hz  
 FIDRES 0.188380 Hz  
 AQ 2.6542580 sec  
 RG 40.3  
 RW 81.000 vsec  
 IE 6.00 vsec  
 TE 296.2 K  
 D1 2.00000000 sec  
 D10 1

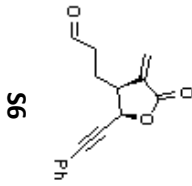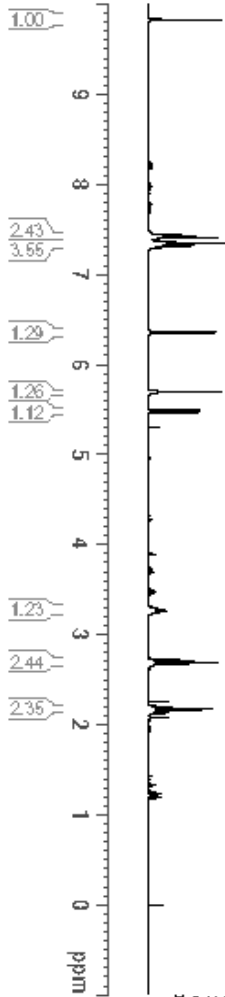

==== CHANNEL F1 =====  
 NUCl 1H  
 P1 5.00 vsec  
 PL1 4.00 dB  
 ST01 300.1418531 MHz  
 F2 - Processing parameters  
 SI 16384  
 SF 300.1399954 MHz  
 WDW EM  
 SSB 0  
 GB 0.10 Hz  
 CB 0  
 PC 1.00

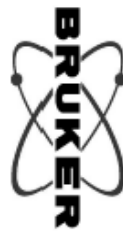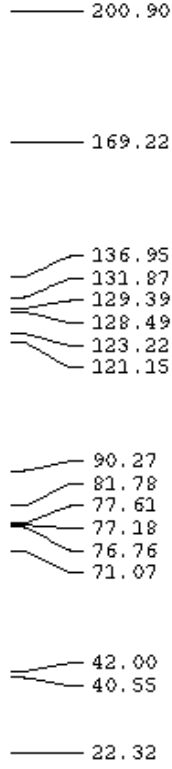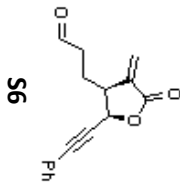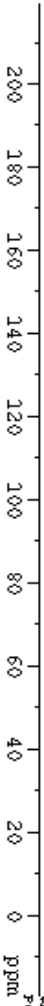

```

Current Data Parameters
NAME      CR-II-154
EXPNO    3
PROCNO   1

F2 - Acquisition Parameters
Date_    20100709
Time     16.49
INSTRUM spect
PROBHD   5 mm 1H/13QCP
PULPROG zgpg30
TD       32768
SOLVENT  CDCl3
NS       29
DS       2
SWH      17985.611 Hz
FIDRES   0.549877 Hz
AQ       0.9110004 sec
RG       16384
RW       27.900 usec
DE       6.00 usec
TE       295.2 K
D1       6.00000000 sec
d11      0.03000000 sec
DELTA    5.90000010 sec
TD0      1

===== CHANNEL f1 =====
NUC1      13C
P1        5.00 usec
PL1       0.00 dB
SFO1     75.4778106 MHz

===== CHANNEL f2 =====
CPDPRG2  waltz16
NUC2      13C
PCPD2     100.00 usec
PL2       4.00 dB
PL12     22.98 dB
PL13     120.00 dB
SFO2     300.1412006 MHz

F2 - Processing parameters
SI        32768
SF        75.4702530 MHz
WDW       EM
SSB       0
LB        1.00 Hz
GB        0
PC        1.40
    
```

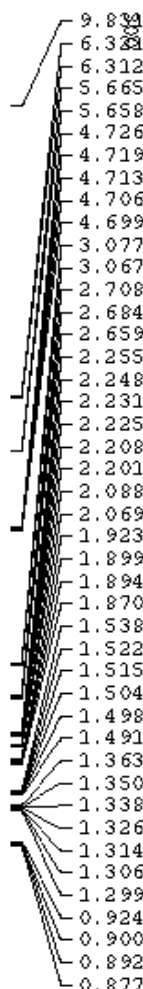

Current Data Parameters  
 NAME CR-11-193  
 EXPNO 1  
 PROCNO 1

===== CHANNEL f1 =====  
 NP01 1H  
 P1 5.00 vsec  
 P11 4.00 dB  
 ST01 300.1418531 kHz

PC 1.00

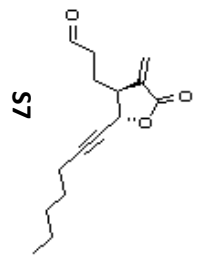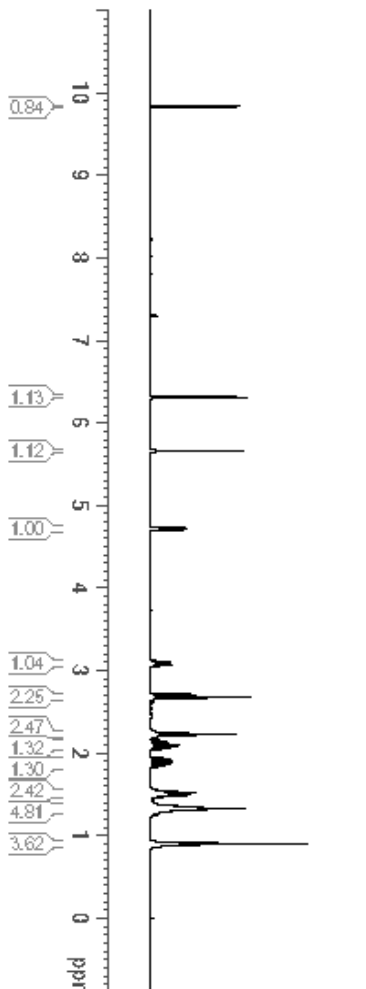

===== CHANNEL f1 =====  
 NP01 1H  
 P1 5.00 vsec  
 P11 4.00 dB  
 ST01 300.1418531 kHz

PC 1.00

F2 - Acquisition Parameters  
 Date\_ 20100802  
 Time 14:27  
 INSTRUM spect  
 PRORND 5 mm TAI vpro cl  
 PULPROG zg  
 TD 32768  
 SOLVENT CDCl3  
 NS 16  
 DS 2  
 SWH 6172.839 MHz  
 FIDRES 0.188380 MHz  
 AQ 2.6542580 sec  
 RG 40.3  
 INW 81.000 vsec  
 IE 6.00 vsec  
 IB 295.2 K  
 D1 2.00000000 sec  
 D11 1

F2 - Processing parameters  
 SI 16384  
 SF 300.1399939 kHz  
 WDW EM  
 SSB 0  
 LB 0.10 Hz  
 GB 0  
 PC 1.00



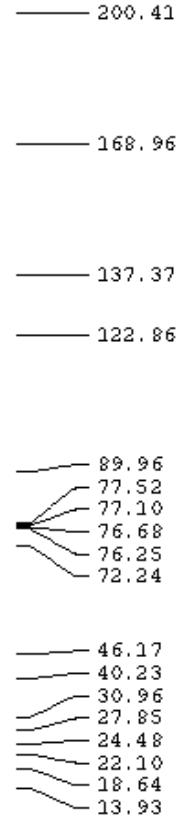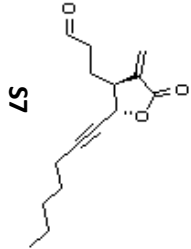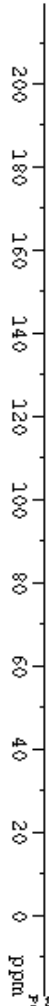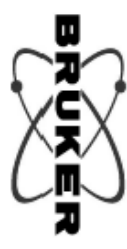

Current Data Parameters  
 NAME CR-II-193  
 EXPRNO 2  
 PROCNO 1

F2 - Acquisition Parameters  
 Date\_ 20100802  
 Time 14.33  
 INSTRM spect  
 PRCBRD 5 mm hsq1hnucl  
 PULPROG zgpg30  
 TD 32768  
 CPDPRG2 cpdprg2  
 SOLVENT CDCl3  
 NS 37  
 DS 2  
 SWH 17985.611 Hz  
 FIDRES 0.548877 Hz  
 AQ 0.9110004 sec  
 RC 4597.6  
 LW 27.900 usec  
 DE 6.00 usec  
 TE 295.2 K  
 D1 6.00000000 sec  
 d11 0.03000000 sec  
 DELTA 5.90000010 sec  
 TP0 1

===== CHANNEL f1 =====  
 NUCL1 13C  
 P1 5.00 usec  
 PL1 0.00 dB  
 SFO1 75.4778106 MHz

===== CHANNEL f2 =====  
 CPDPRG2 waltz16  
 NUCL2 1H  
 P2 100.00 usec  
 PL2 4.00 dB  
 PL12 22.98 dB  
 PL13 120.00 dB  
 SFO2 300.1412006 MHz

F2 - Processing parameters  
 SI 32768  
 SF 75.4702530 MHz  
 WDW EM  
 SSB 0  
 GB 0  
 CB 0  
 PC 1.40

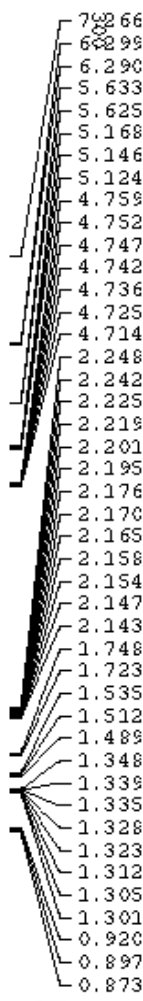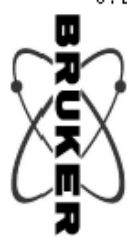

Current Data Parameters  
 RUNID CR-11-195  
 EXPNO 1  
 PROCNO 1

F2 - Acquisition Parameters  
 Date\_ 20100804  
 Time 15.08  
 INSTRUM spect  
 PRORND 5 mm Thal.kno.cl  
 PULPROG zg  
 TD 32768  
 SOLVENT CDCl3  
 NS 16  
 DS 2  
 SWH 6172.839 MHz  
 FIDRES 0.188380 MHz  
 AQ 2.6542580 sec  
 RG 161.3  
 RW 81.000 vsec  
 IE 6.00 vsec  
 TE 297.2 K  
 D1 2.00000000 sec  
 D10 1

==== CHANNEL f1 ====  
 NUCl 1H  
 P1 5.00 vsec  
 PL1 4.00 dB  
 SFO1 300.1418631 MHz  
 F2 - Processing parameters  
 SI 16384  
 SF 300.1400039 MHz  
 WDW EM  
 SSB 0  
 LB 0.10 HZ  
 GB 0  
 PC 1.00

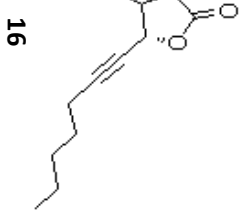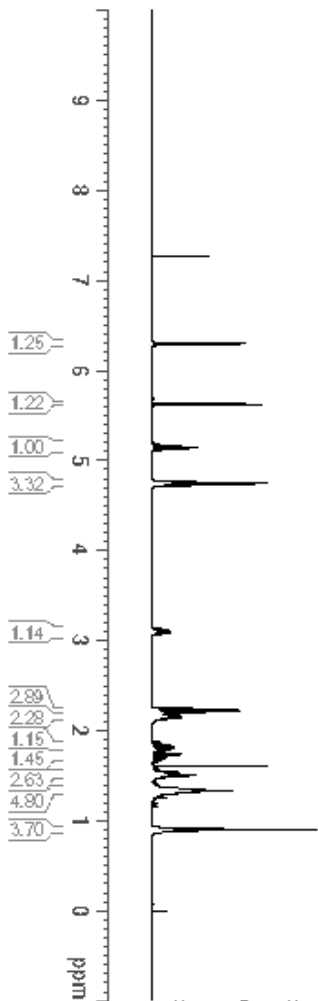

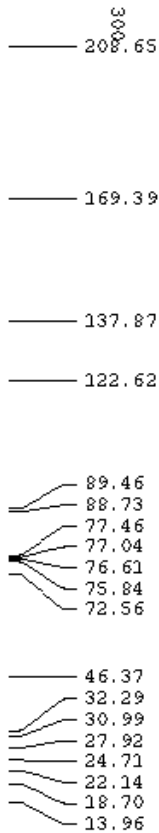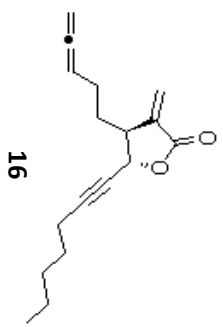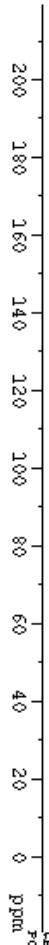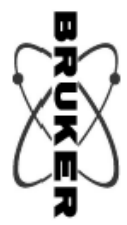

Current Data Parameters  
 NAME CR-II-195  
 EXPNO 2  
 PROCNO 1

F2 - Acquisition Parameters  
 Date\_ 20100804  
 Time 19:47  
 INSTRUM spect  
 PROBRW 5 mm hsq1hprsd1  
 PULPROG zgpg30  
 TD 32768  
 SFO100 100.626130  
 SOLVENT CDCl3  
 NS 6278  
 DS 2  
 SWH 17985.611 Hz  
 FIDRES 0.548877 Hz  
 AQ 0.9110004 sec  
 FC 18390.4  
 BW 27.800 vsec  
 DE 6.00 vsec  
 TE 298.2 K  
 D1 6.00000000 sec  
 d11 0.03000000 sec  
 DELTA 5.98000010 sec  
 ID0 1

===== CHANNEL f1 =====  
 NP01 136  
 P1 5.00 vsec  
 P11 0.00 dB  
 SFO1 75.4778106 MHz

===== CHANNEL f2 =====  
 CPDPRG2 waltz16  
 NO2 18  
 P0P02 100.00 vsec  
 P12 4.00 dB  
 P112 22.88 dB  
 P113 120.00 dB  
 SFO2 300.1412008 MHz

F2 - Processing parameters  
 SI 32768  
 SF 75.4702650 MHz  
 WDW EM  
 SSB 0  
 GB 0  
 PC 1.40

7.454  
7.449  
7.444  
7.430  
7.423  
7.354  
7.348  
7.341  
7.323  
7.264  
6.338  
6.329  
5.654  
5.645  
5.494  
5.468  
5.177  
5.155  
5.133  
4.749  
4.739  
4.728  
4.717  
4.706  
3.293  
3.285  
3.267  
3.258  
2.236  
2.229  
2.218  
2.207  
2.196  
2.185  
2.055  
2.030  
2.027  
2.004  
1.980  
1.959  
1.952  
1.936  
1.931  
1.928

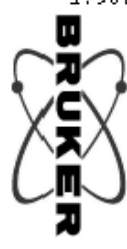

Current Data Parameters  
NAME CS-11-187  
EXPNO 5  
PROCNO 1

F2 - Acquisition Parameters  
Date\_ 20100727  
Time 20.15

INSTRUM spect  
PROBHD 5 mm TAI vPro-1  
PULPROG zg  
TD 32768

SOLVENT CDCl3  
NS 16  
DS 2

SWH 6172.839 MHz  
FIDRES 0.189380 MHz  
AQ 2.6542580 sec

RG 256  
RW 81.000 vsec  
RE 6.00 vsec  
TE 294.2 K  
D1 2.0000000 sec  
TD 1

==== CHANNEL f1 =====  
NUC1 1H  
P1 5.00 vsec  
PL1 4.00 dB  
SFO1 300.1418631 MHz

F2 - Processing parameters  
SI 16384  
SF 300.1400045 MHz  
WDW EM  
SSB 0  
LB 0.10 MHz  
GB 0  
PC 1.00

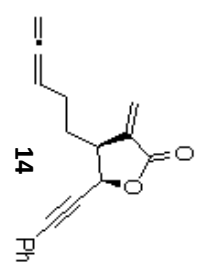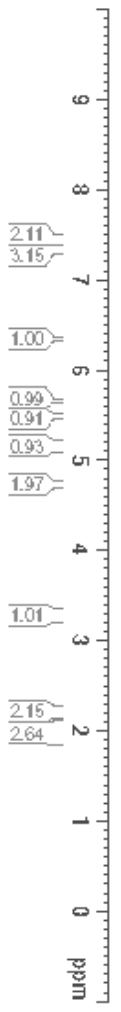

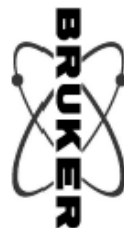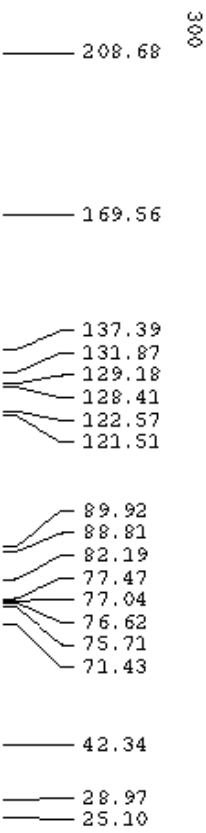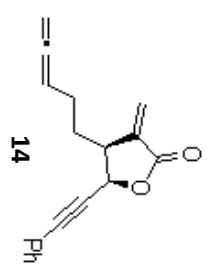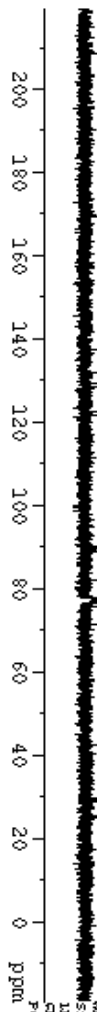

```

Current Data Parameters
NAME      CR-11-187
EXPTNO    6
PROCNO    1

F2 - Acquisition Parameters
Date_     20100728
Time      9.12
INSTRUM   spect
PROBHD    5 mm 1H/13Cv1
PULPROG   zgpg30
TD        32768
SOLVENT   CDCl3
NS        246
DS        2
SWH        17985.611 MHz
FIDRES     0.548877 MHz
AQ         0.9110004 sec
RG         11585.2
BW         27.900 vsec
DE         6.00 vsec
TE         299.2 K
D1         6.00000000 sec
d11        0.03000000 sec
DELTA     5.90000010 sec
TD0        1

===== CHANNEL f1 =====
NUC1       13C
P1         5.00 vsec
PL1        0.00 dB
SFO1       75.4778106 MHz

===== CHANNEL f2 =====
CPDPRG2    waltz16
NUC2       1H
PCPD2      100.00 vsec
P12        4.00 dB
PL12       22.98 dB
PL13       120.00 dB
SFO2       300.1412006 MHz

F2 - Processing parameters
SI         32768
SF         75.4702530 MHz
WDW        EM
SSB        0
LB         1.00 Hz
GB         0
CB         0
PC         1.40
  
```

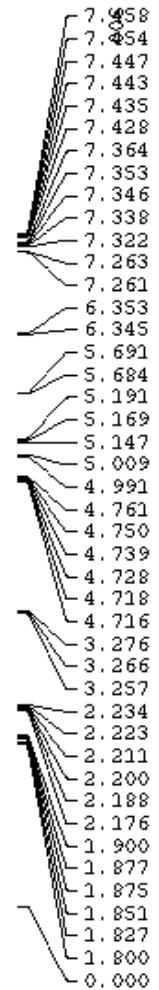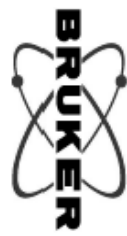

Current Data Parameters  
NAME: 08-11-179  
EXPNO: 1  
PROCNO: 1

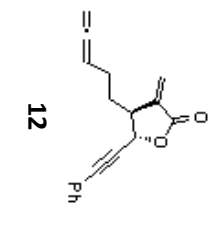

F2 - Acquisition Parameters  
Date\_ 20100715  
Time 16.20  
INSTRUM spect  
PROBHD 5 mm TAI-100-1  
PULPROG zg  
ID 32768  
SOLVENT CDCl3  
NS 16  
DS 2  
SWH 6172.839 Hz  
FIDRES 0.189380 Hz  
AQ 2.6542580 sec  
RG 161.3  
RW 81.000 vsec  
RE 6.00 vsec  
TE 295.2 K  
D1 2.00000000 sec  
TD0 1

===== CHANNEL f1 =====  
NUC1 1H  
P1 5.00 vsec  
PL1 4.00 dB  
SFO1 300.1418531 MHz  
F2 - Processing parameters  
SI 16384  
SF 300.1400049 MHz  
WDW EM  
SSB 0  
LB 0.10 Hz  
GB 0  
PC 1.00

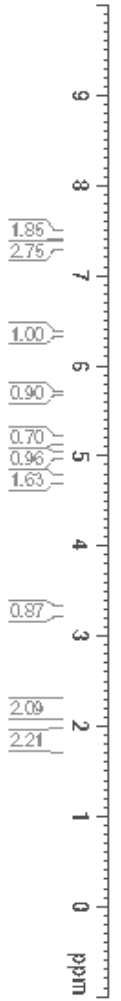

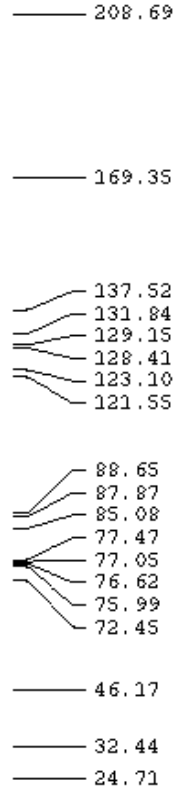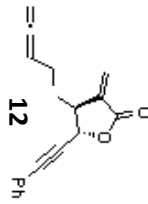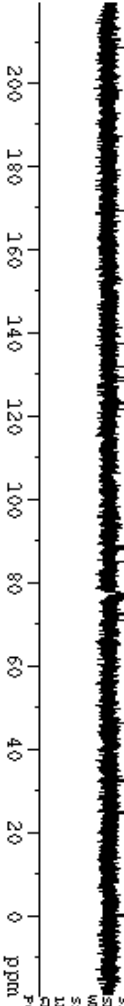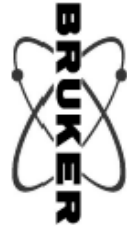

Current Data Parameters  
 NAME CR-11-179  
 EXPRNO 2  
 PROCNO 1

F2 - Acquisition Parameters  
 Date\_ 20100715  
 Time 16.28  
 INSTRM spect  
 PROBRD 5 mm 1H/13C  
 PULPROG zgpg30  
 ID 32768  
 CPDPRG2 cpdprg2  
 SOLVENT DMS  
 NS 198  
 DS 2  
 SWH 17985.611 MHz  
 FIDRES 0.548877 MHz  
 AQ 0.9110004 sec  
 RC 18390.4  
 LW 27.900 usec  
 DE 6.00 usec  
 TD 295.2 K  
 D1 6.00000000 sec  
 d11 0.03000000 sec  
 DELTA 5.90000010 sec  
 TD0 1

===== CHANNEL F1 =====  
 NUCL1 13C  
 P1 5.00 usec  
 PL1 0.00 dB  
 SFO1 75.4778106 MHz

===== CHANNEL F2 =====  
 CPDPRG2 waltz16  
 NUCL2 1H  
 PPRG2 100.00 usec  
 PL2 4.00 dB  
 PL12 22.98 dB  
 PL13 120.00 dB  
 SFO2 300.1412006 MHz

F2 - Processing parameters  
 SI 32768  
 SF 75.4702530 MHz  
 WDW H  
 SSB 0  
 LB 1.00 Hz  
 GB 0  
 PC 1.40

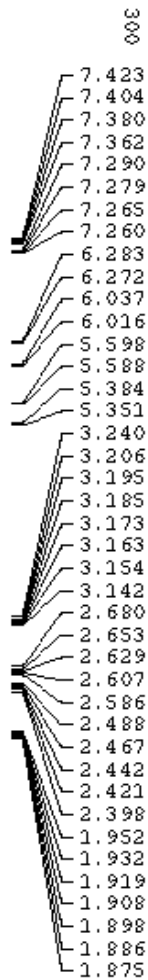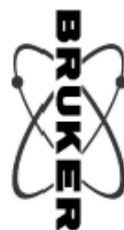

Current Data Parameters  
NAME OR-II-1.80  
EXPTNO 3  
PROCNO 1

F2 - Acquisition Parameters  
Date\_ 20100718  
Time 20.36  
INSTRUM spect  
PROBHD 5 mm Thal ktmxd1  
PULPROG zg  
ID 32748  
SOLVENT CDCl3  
NS 16  
DS 2  
SWH 6172.839 Hz  
FIDRES 0.189380 Hz  
AQ 2.6542580 sec  
RG 287.4  
BW 81.000 vsec  
IE 6.00 vsec  
TE 296.2 K  
D1 2.00000000 sec  
TD 1

===== CHANNEL f1 =====  
NUC1 1H  
P1 5.00 vsec  
PL1 4.00 dB  
SFO1 300.1418531 MHz  
F2 - Processing parameters  
SI 16384  
SF 300.1400000 MHz  
WDW EM  
SSB 0  
LB 0.10 Hz  
GB 0  
PC 1.00

13

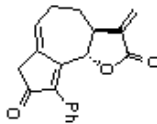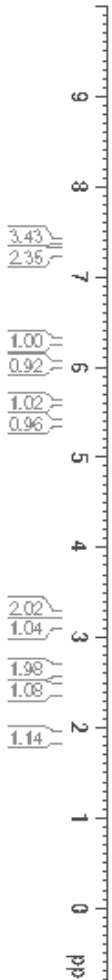



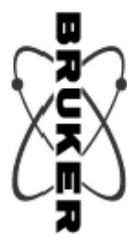

Current Data Parameters  
 NAME CR-11-180  
 EXPRNO 1  
 PROCNO 1

F2 - Acquisition Parameters  
 Date\_ 20100719  
 Time 7.49  
 INSTRM spect  
 PROBRD 5 mm 1H113vnl  
 PULPROG zgpg30  
 TD 32768  
 ID CP-c13  
 SOLVENT NS  
 NS 5811  
 DS 2  
 SWH 17985.611 Hz  
 FIDRES 0.548877 Hz  
 AQ 0.911004 sec  
 KC 574.7  
 BW 27.800 vsec  
 DB 6.00 vsec  
 TD 296.2 K  
 D1 6.00000000 sec  
 d11 0.03000000 sec  
 DELTA 5.90000010 sec  
 TP0 1

===== CHANNEL f1 =====  
 NUCl 13C  
 P1 5.00 vsec  
 PL1 0.00 dB  
 SFO1 75.4778106 MHz

===== CHANNEL f2 =====  
 CPDPRG2 waltz16  
 NUCl2 1H  
 PPRG2 100.00 vsec  
 PL2 4.00 dB  
 PL12 22.98 dB  
 PL13 120.00 dB  
 SFO2 300.1412006 MHz

F2 - Processing parameters  
 SI 32768  
 SF 75.4702630 MHz  
 ADRW 81  
 SSB 0  
 CB 1.00 Hz  
 PC 1.40

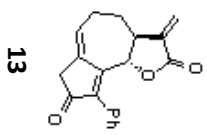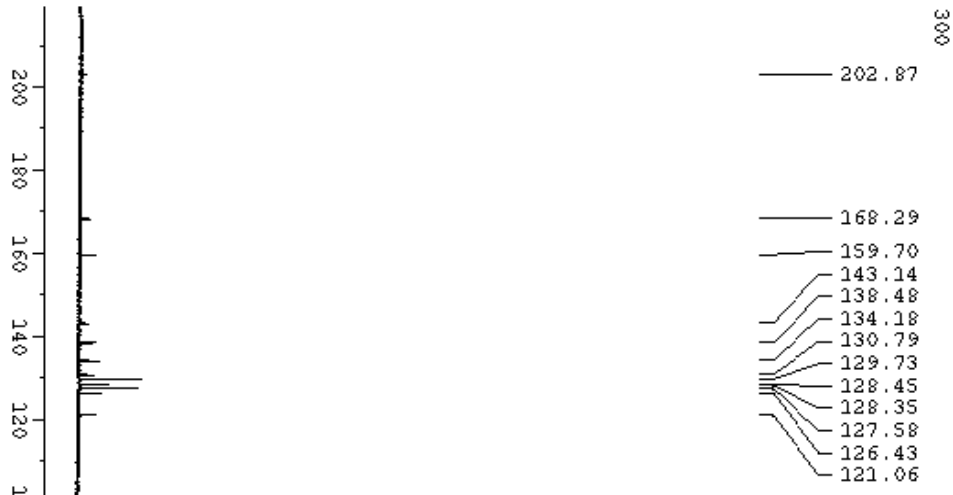

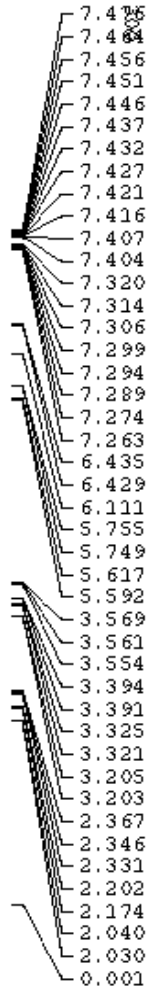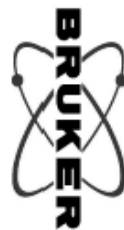

Current Data Parameters  
 NAME GR-11-190  
 EXPNO 2  
 PROCNO 1

F2 - Acquisition Parameters  
 Date\_ 20100729  
 Time 17.36  
 INSTRUM spect  
 PROBRD 5 mm TAI (1) vco-cl  
 PULPROG zg  
 TD 32768  
 SOLVENT CDCl3  
 NS 16  
 DS 2

SWH 6172.839 MHz  
 FIDRES 0.189380 MHz  
 AQ 2.6542580 sec  
 RG 645.1  
 BW 81.000 vsec  
 BE 6.00 vsec  
 TE 296.2 K  
 D1 2.00000000 sec  
 D0 1

15

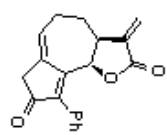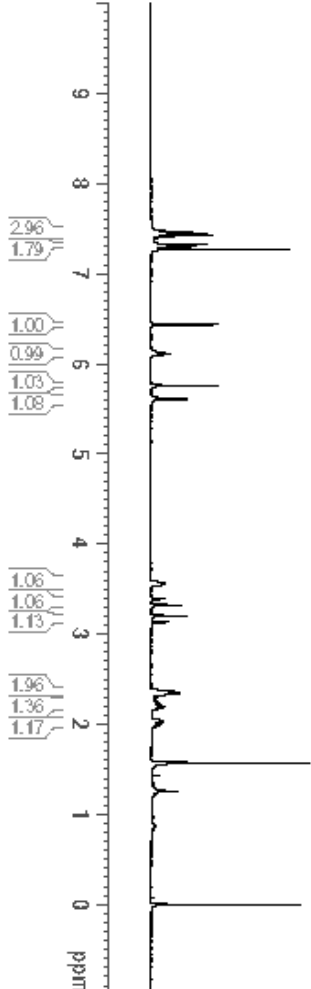

==== CHANNEL f1 =====  
 NUCL 1H  
 P1 5.00 vsec  
 PL1 4.00 dB  
 SFO1 300.1418531 MHz  
 F2 - Processing parameters  
 SI 16384  
 SF 300.1400045 MHz  
 WDW EM  
 SSB 0  
 LB 0.10 MHz  
 GB 0  
 PC 1.00

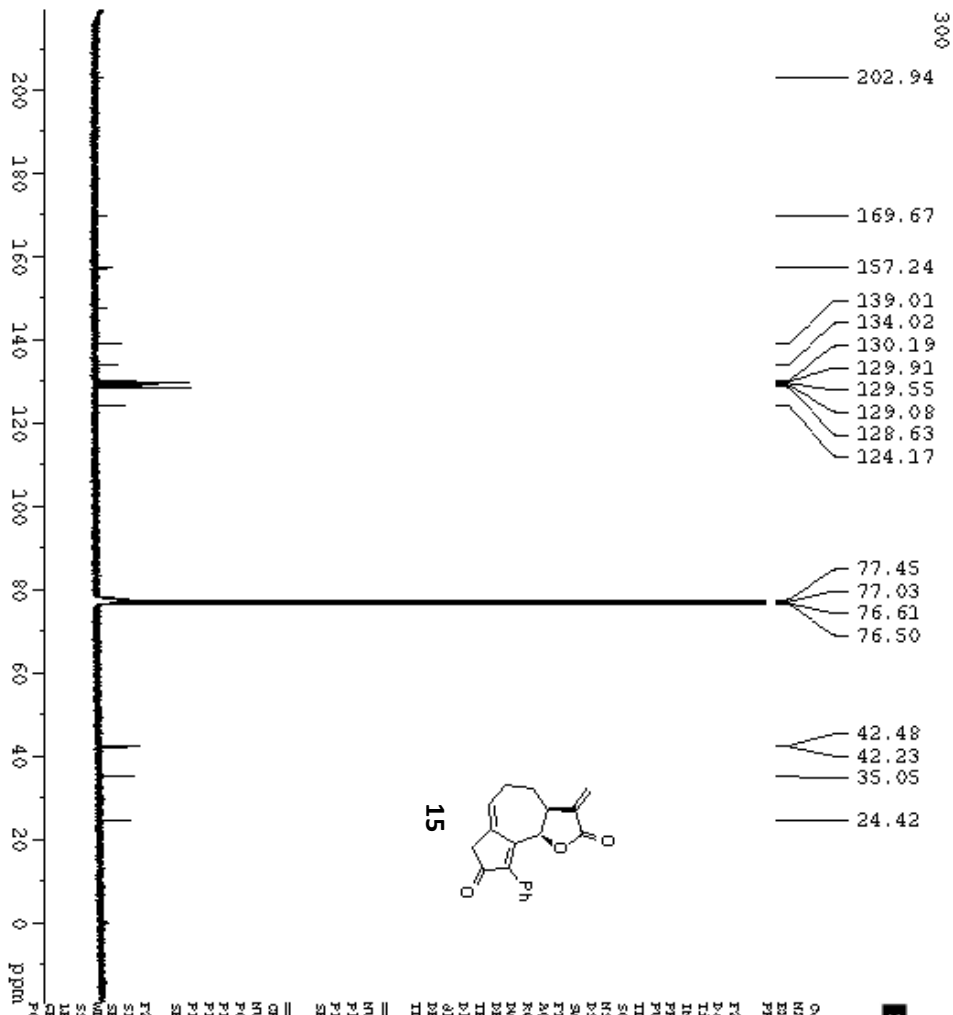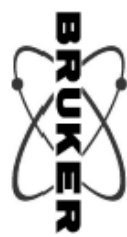

Current Data Parameters  
 NAME CR-II-190  
 EXPNO 7  
 PROCNO 1

F2 - Acquisition Parameters  
 Date\_ 20100729  
 Time 20.30  
 INSTRM spect  
 PRGRM 5 mm hpl1invd  
 PULPROG zgpg30  
 TD 32768  
 CPDPRG2 cpd13  
 SOLVENT CDCl3  
 NS 6185  
 DS 2

SWH 17985.611 Hz  
 FIDRES 0.548977 Hz  
 AQ 0.9110004 sec  
 KC 1.6384  
 BW 27.900 vsec  
 DB 6.00 vsec  
 TB 295.2 K  
 D1 6.00000000 sec  
 d11 0.03000000 sec  
 DELTA 5.90000010 sec  
 TD 0

===== CHANNEL f1 =====  
 NU01 13C  
 P1 5.00 vsec  
 P11 0.00 dB  
 SFO1 75.4778106 MHz

===== CHANNEL f2 =====  
 CPDPRG2 waltz16  
 NU02 1H  
 P0PR2 100.00 vsec  
 P12 4.00 dB  
 P112 22.98 dB  
 P113 120.00 dB  
 SFO2 300.1412006 MHz

F2 - Processing parameters  
 SI 32768  
 SF 75.4702630 MHz  
 WDSW 0  
 SSB 0  
 GB 1.00 Hz  
 CB 0  
 PC 1.40

4000

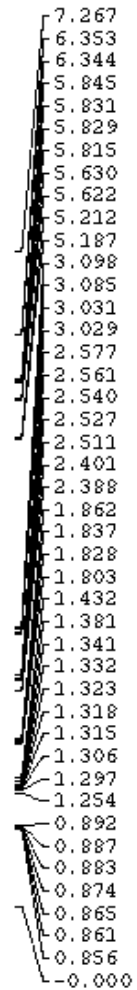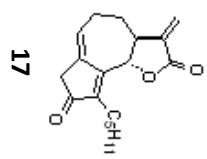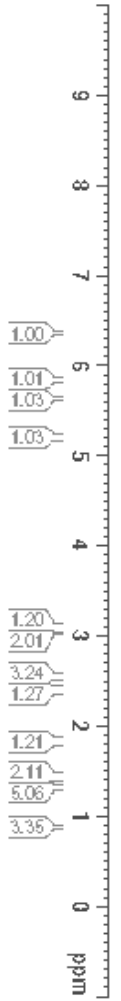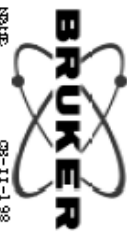

```

NAME      08-11-198
EXPNO     1
PROCNO    1
Date_     20100906
Time      14.30
INSTRUM   spect
PROBHD    5 mm PABBO BBO-
PULPROG   zg30
ID         65536
SOLVENT   CDCl3
NS         16
DS         2
SWH        8223.695 HZ
FIDRES     0.129493 HZ
AQ         3.9846387 sec
RG         144
AW         60.800 vsec
KE         6.50 vsec
TE         295.1 K
D1         2.000000000 sec
TD0        1

===== CHANNEL f1 =====
NUC1       1H
P1         14.31 vsec
PL1        -1.00 dB
PL1W       11.09969412 W
SFO1       400.2324716 MHz
SI         32768
SF         400.2300100 MHz
WDW        EM
SSB        0
GB         0.30 HZ
PC         1.00
  
```

4000

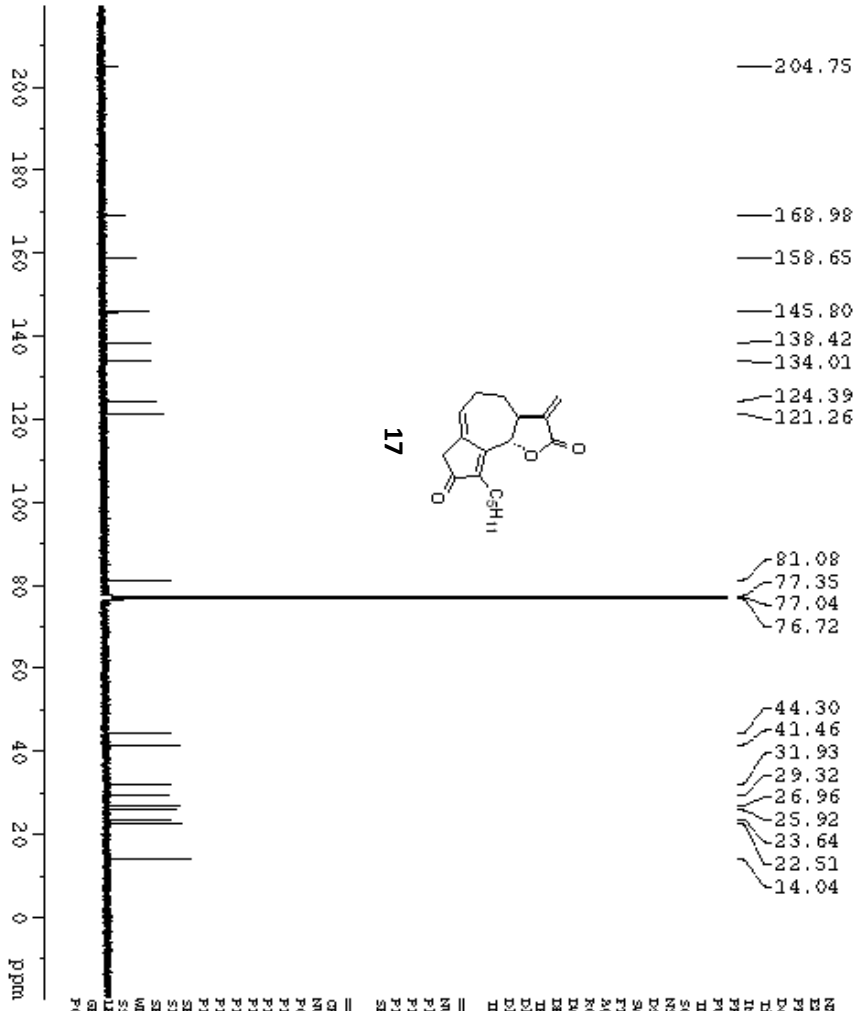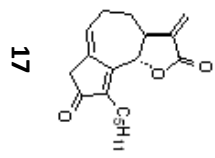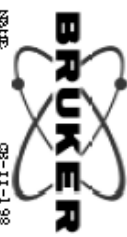

```

NAME      GR-11-1-98
EXPNO     2
PROCNO    1
Date_     20100806
Time      14.45
INSTRUM   spect
PROBHD    5 mm PABBO BBO-
PULPROG   zgpg30
TD         65536
FIDRES    0.030000000
AQ         0.030000000
RG         203
RW         20.800
RE         6.50
TE         295.3 K
D1         3.000000000
D11        0.030000000
DPO        1

===== CHANNEL f1 =====
NUC1       13C
P1         10.00
PL1        -1.59
PL1W       51.07626343
SFO1       100.6279775

===== CHANNEL f2 =====
CPDPRG2   veltz16
NUC2       1H
PCPD2      75.00
PL2        -1.00
PL2W       13.39
PL3        20.00
PL3W       11.09959412
PL4W       0.40393090
SFO2       400.2316009
SI         32768
SF         100.6279140
WDW        EM
SSB        0
GB         1.00
PC         0
  
```

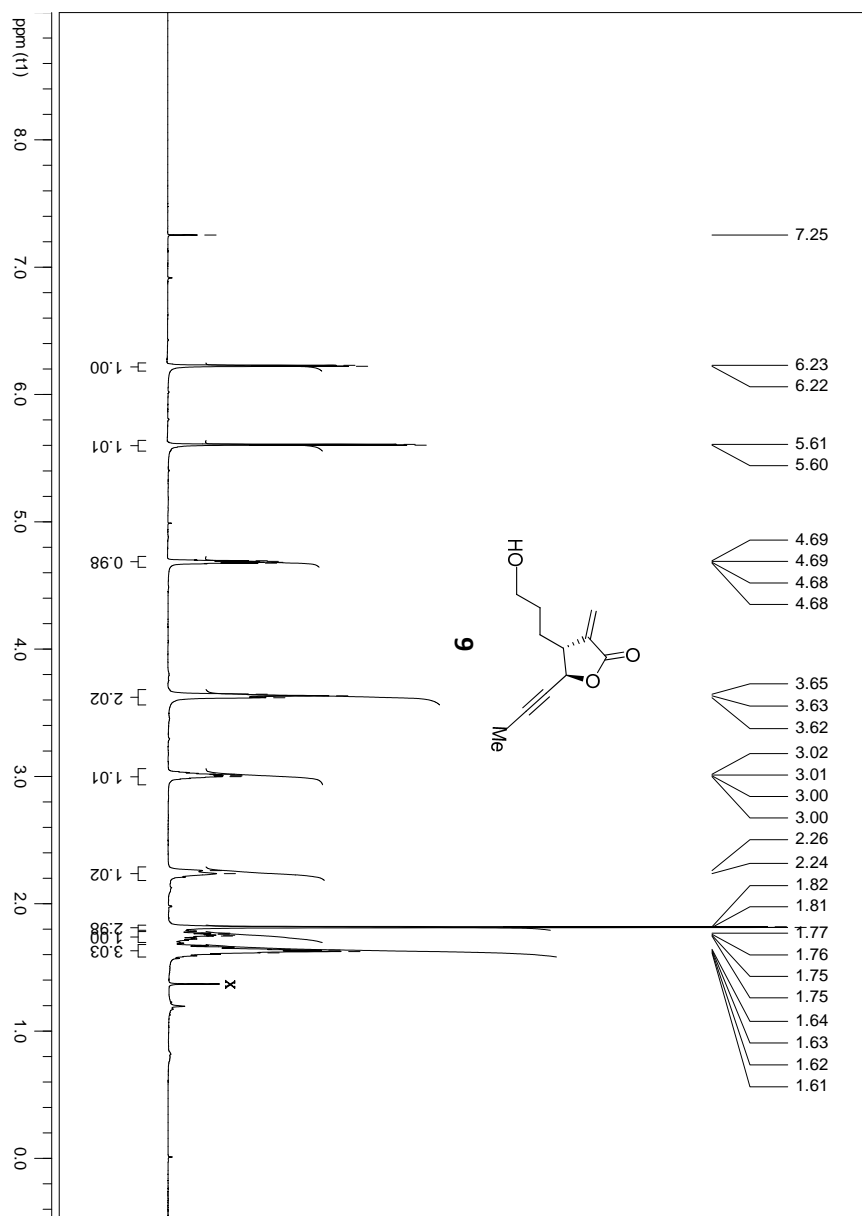

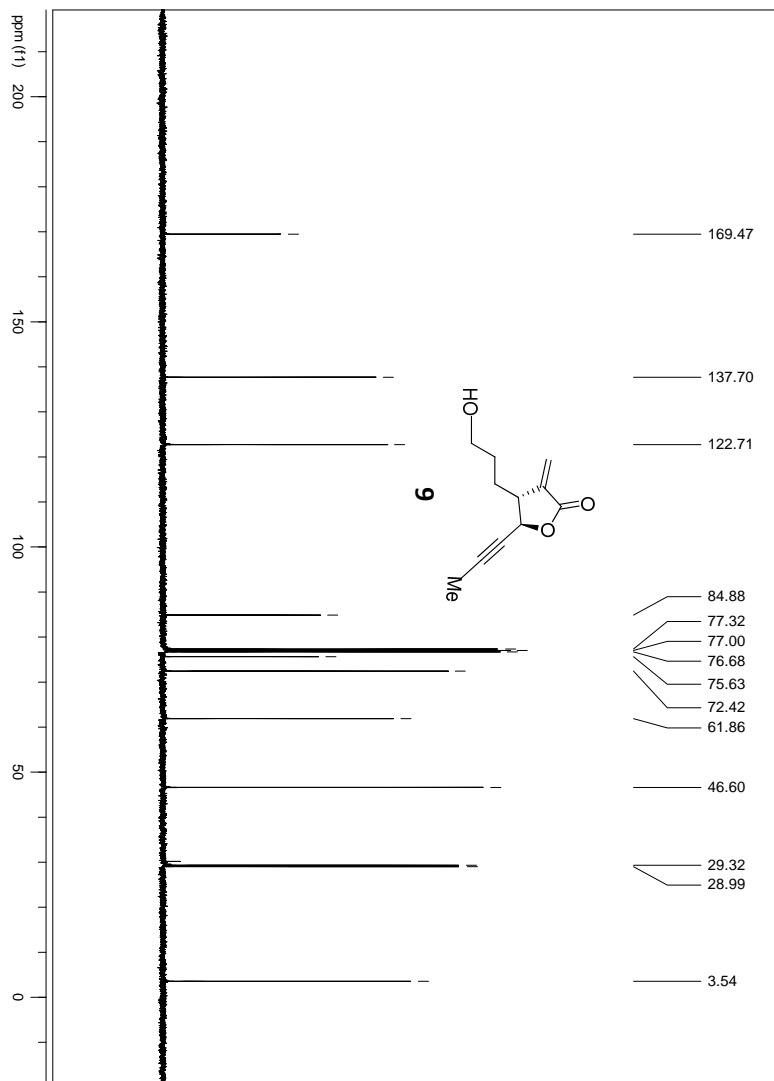

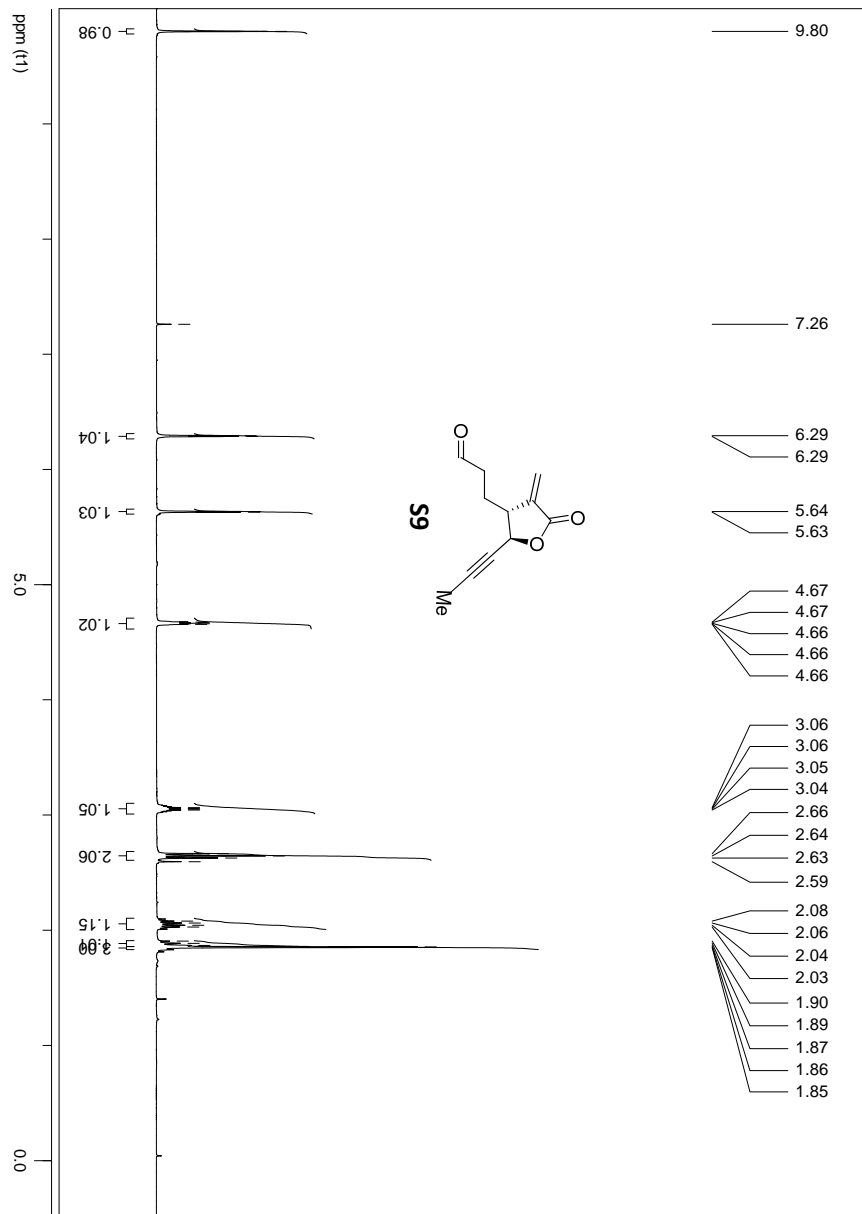



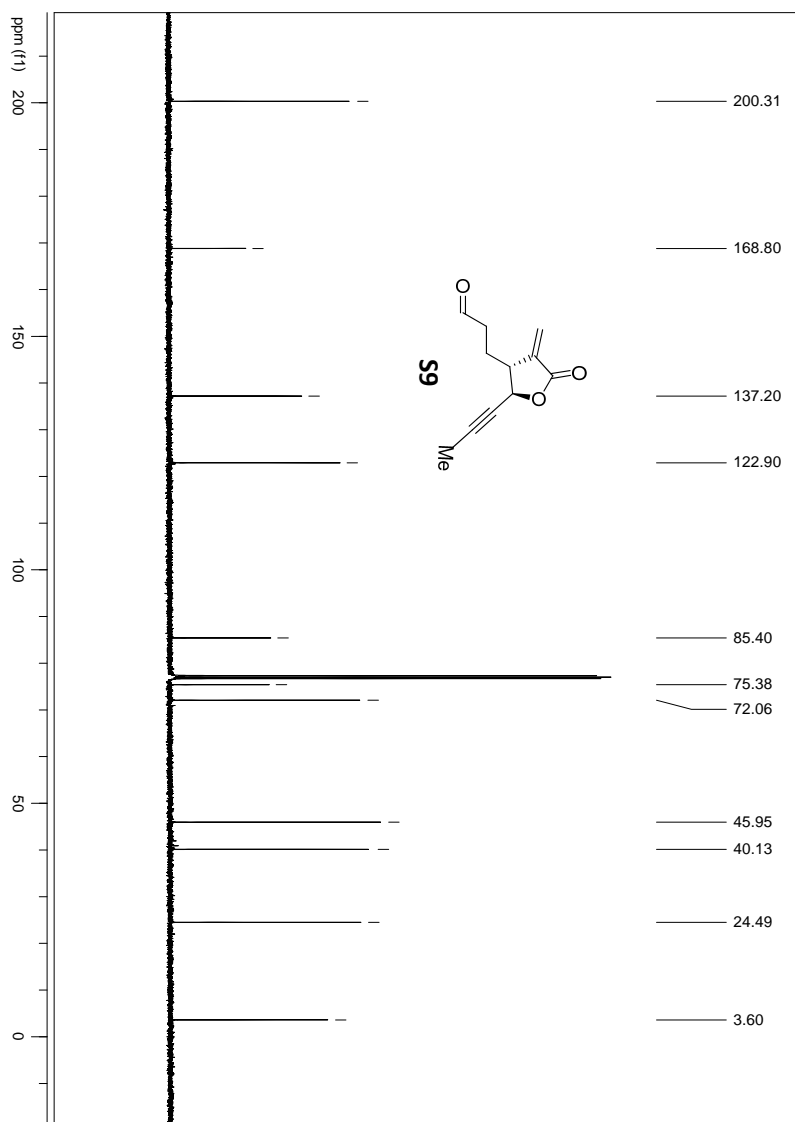

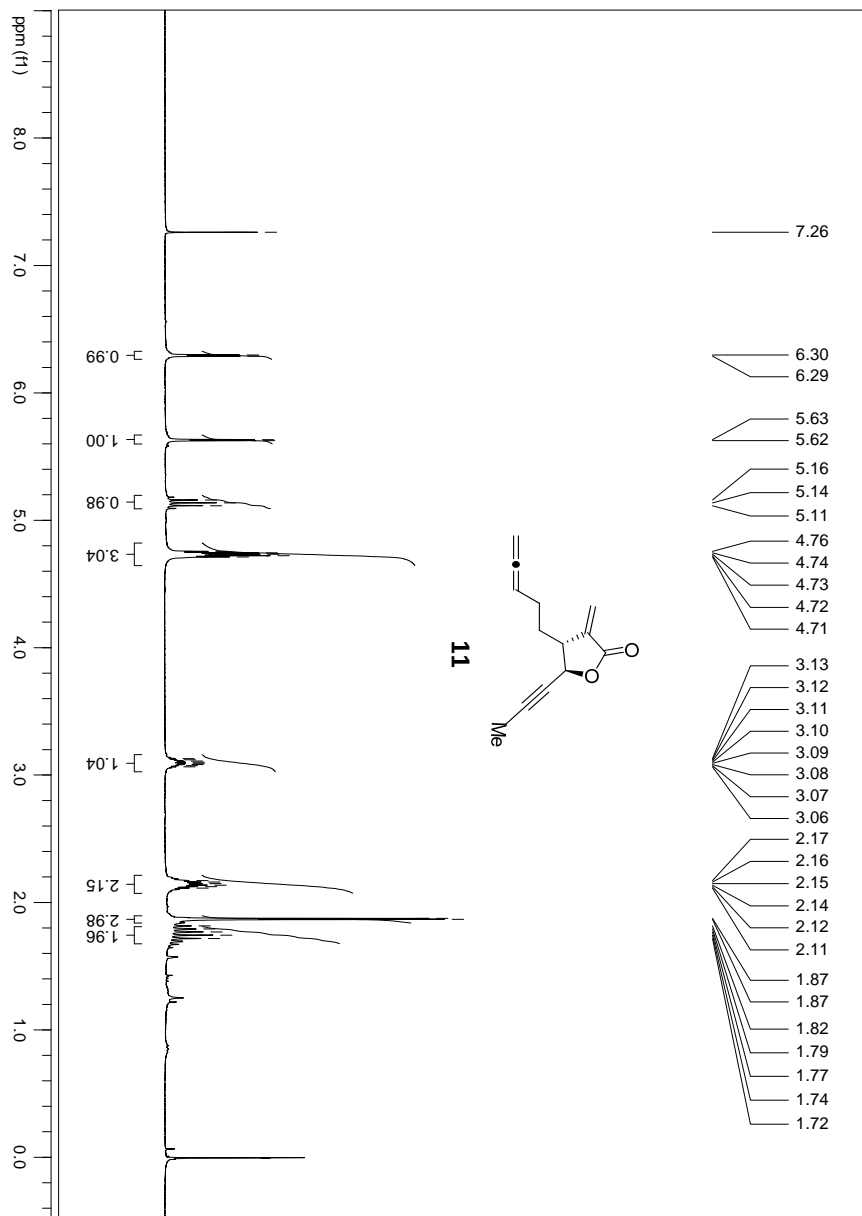

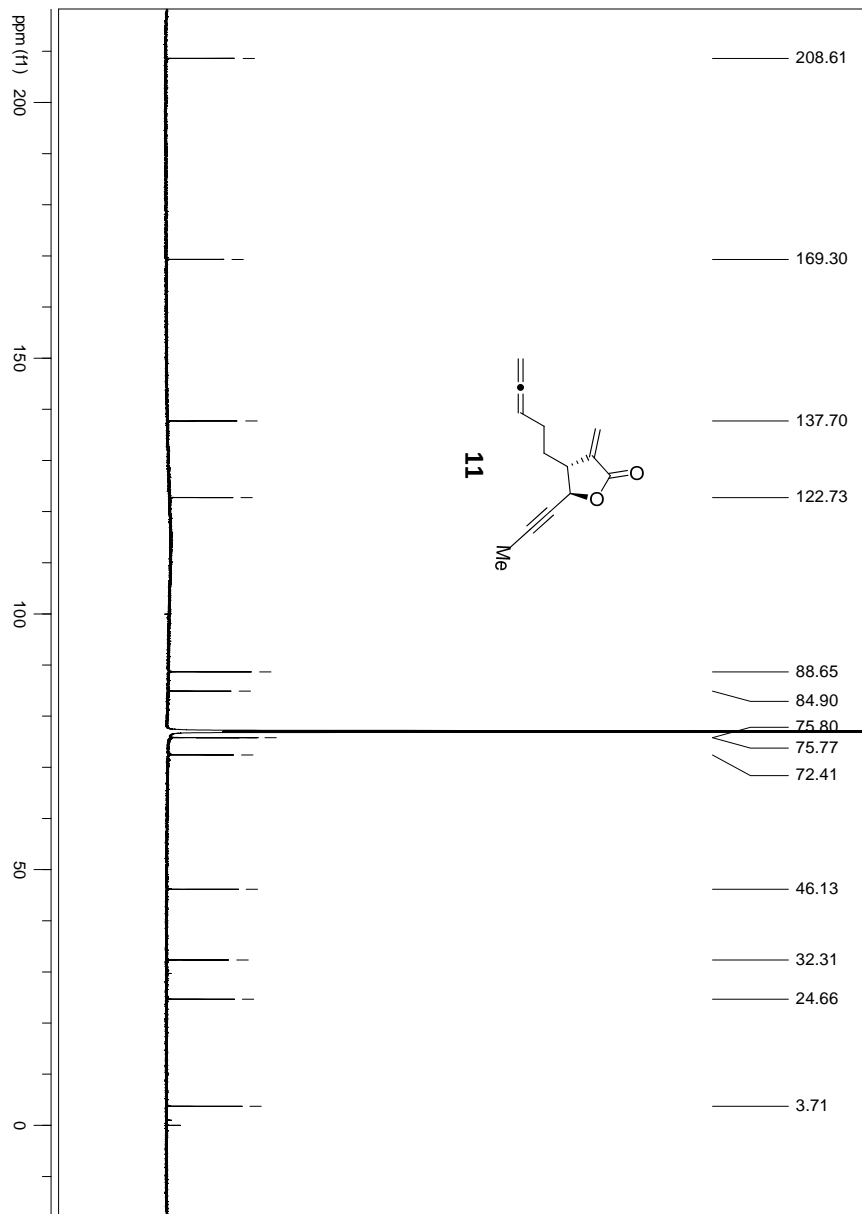

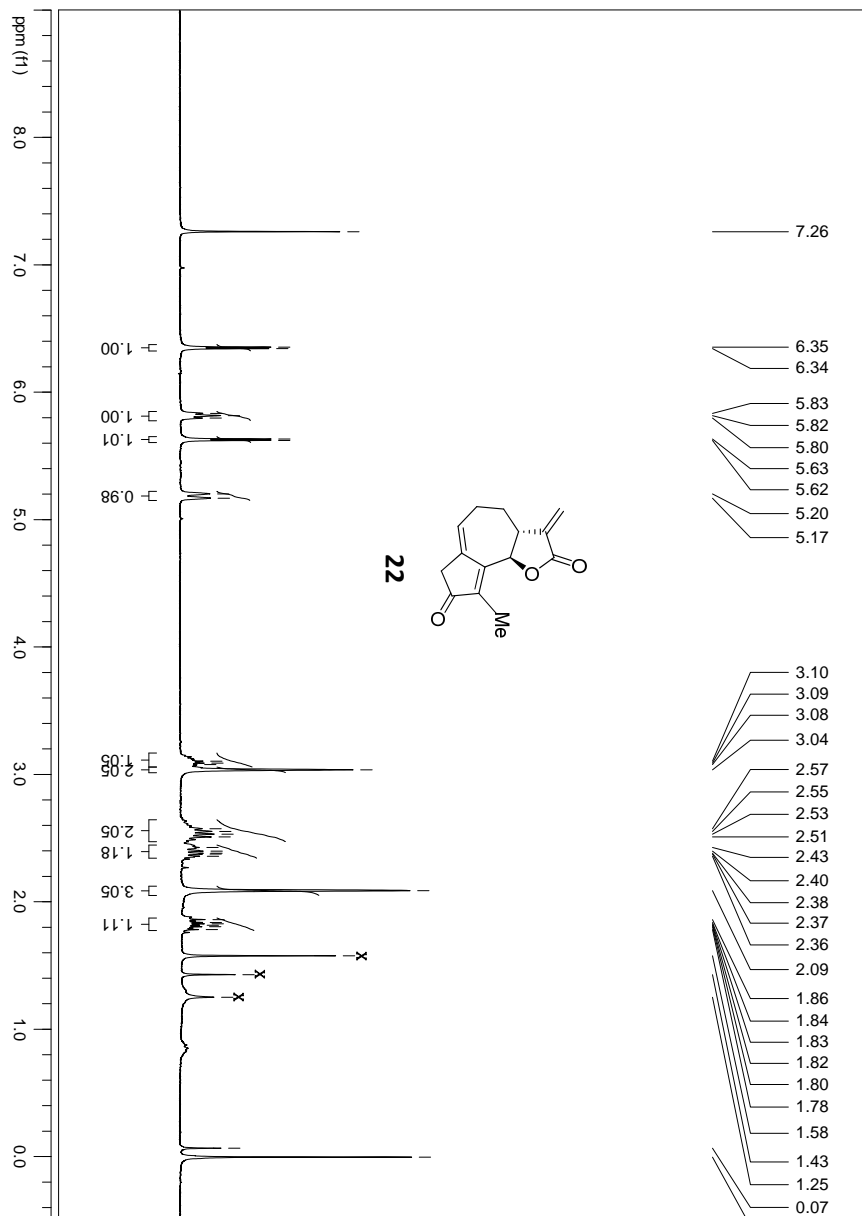

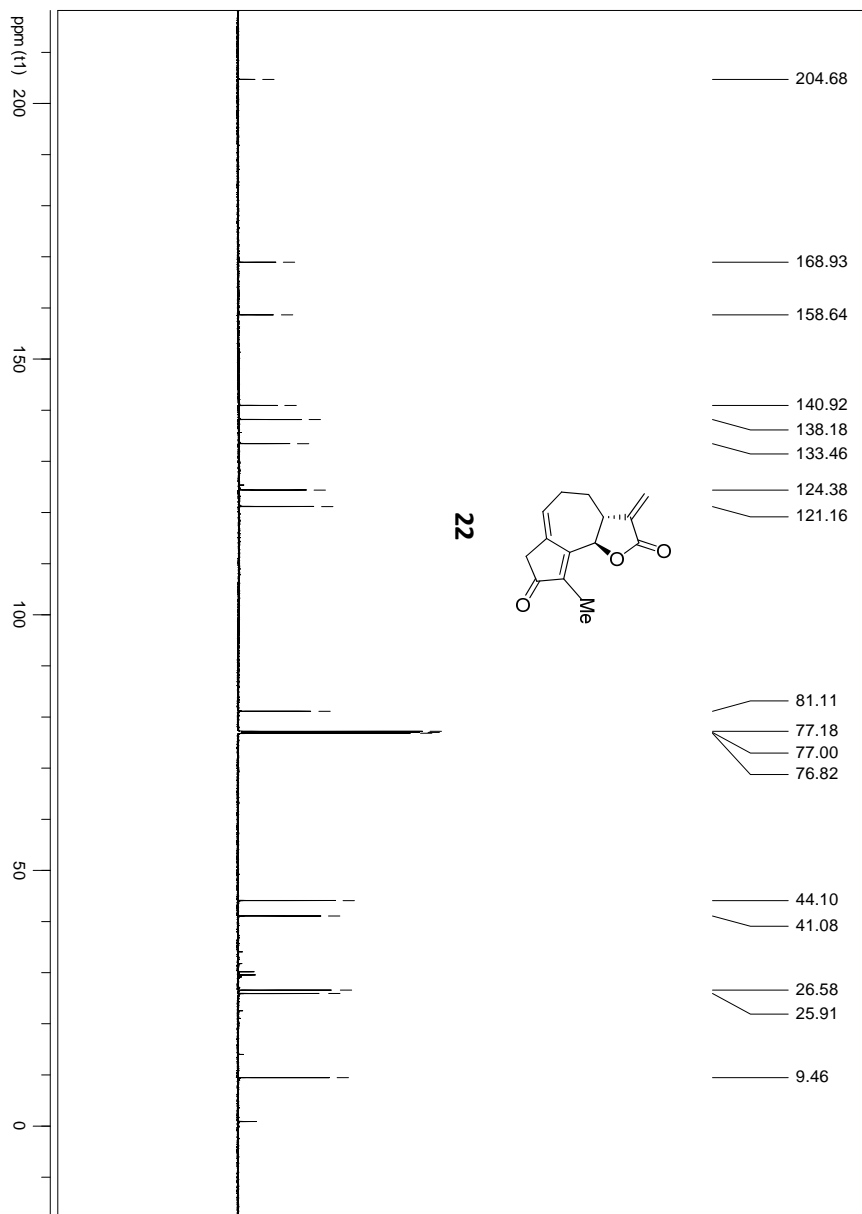

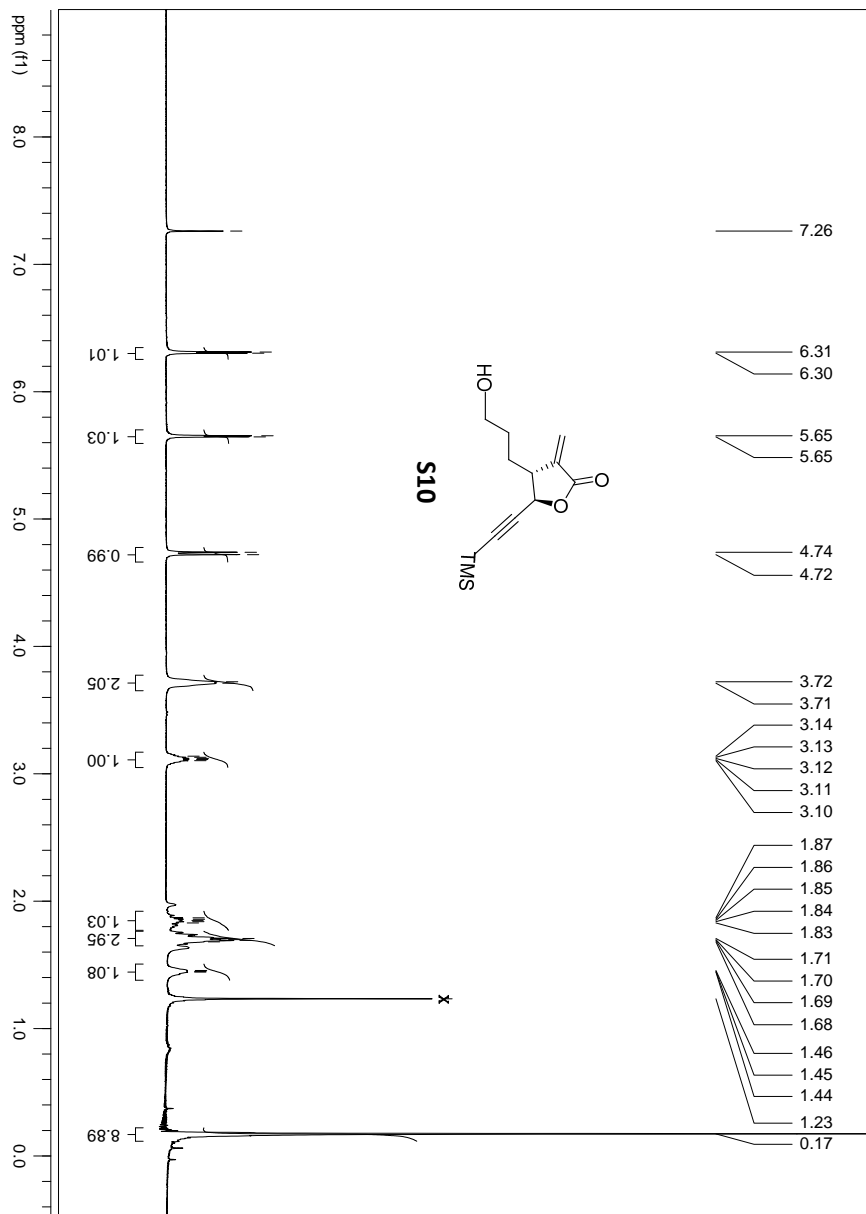

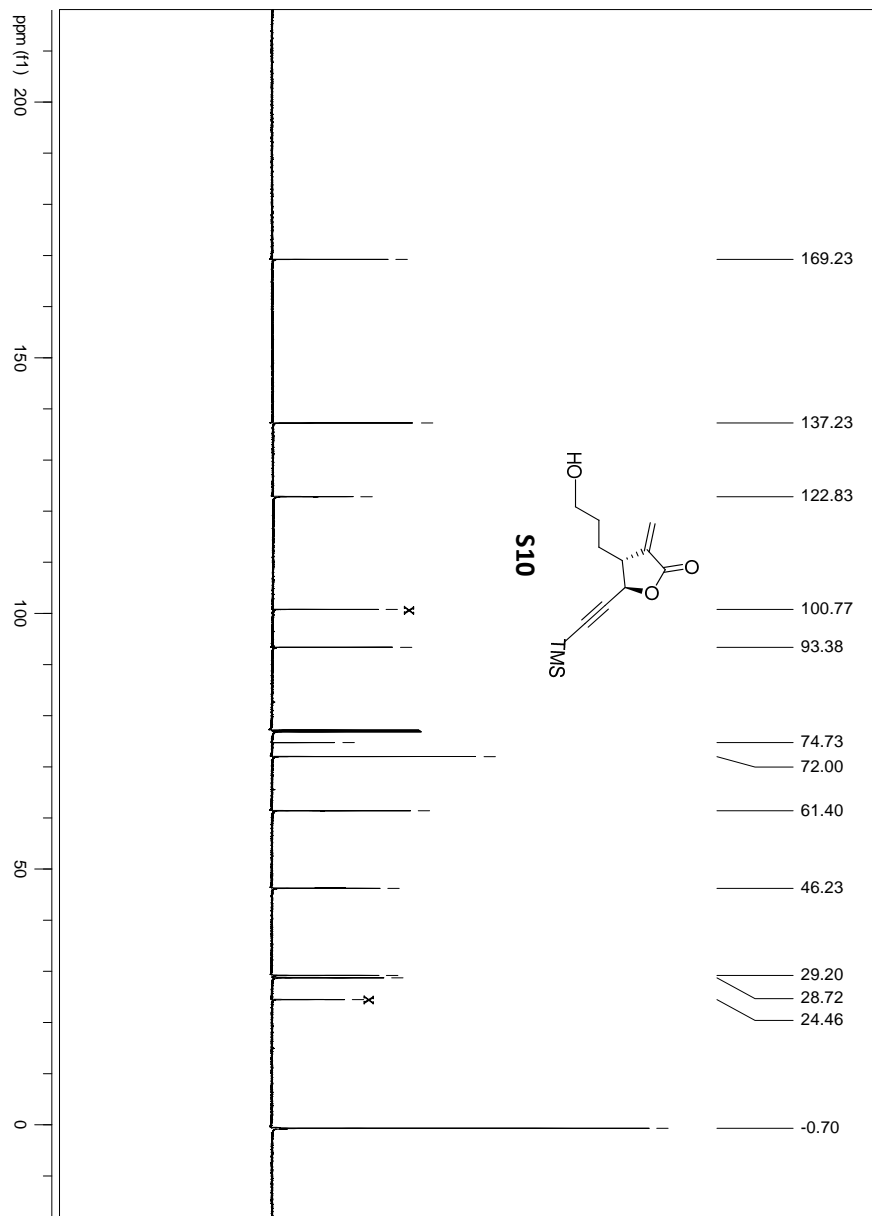

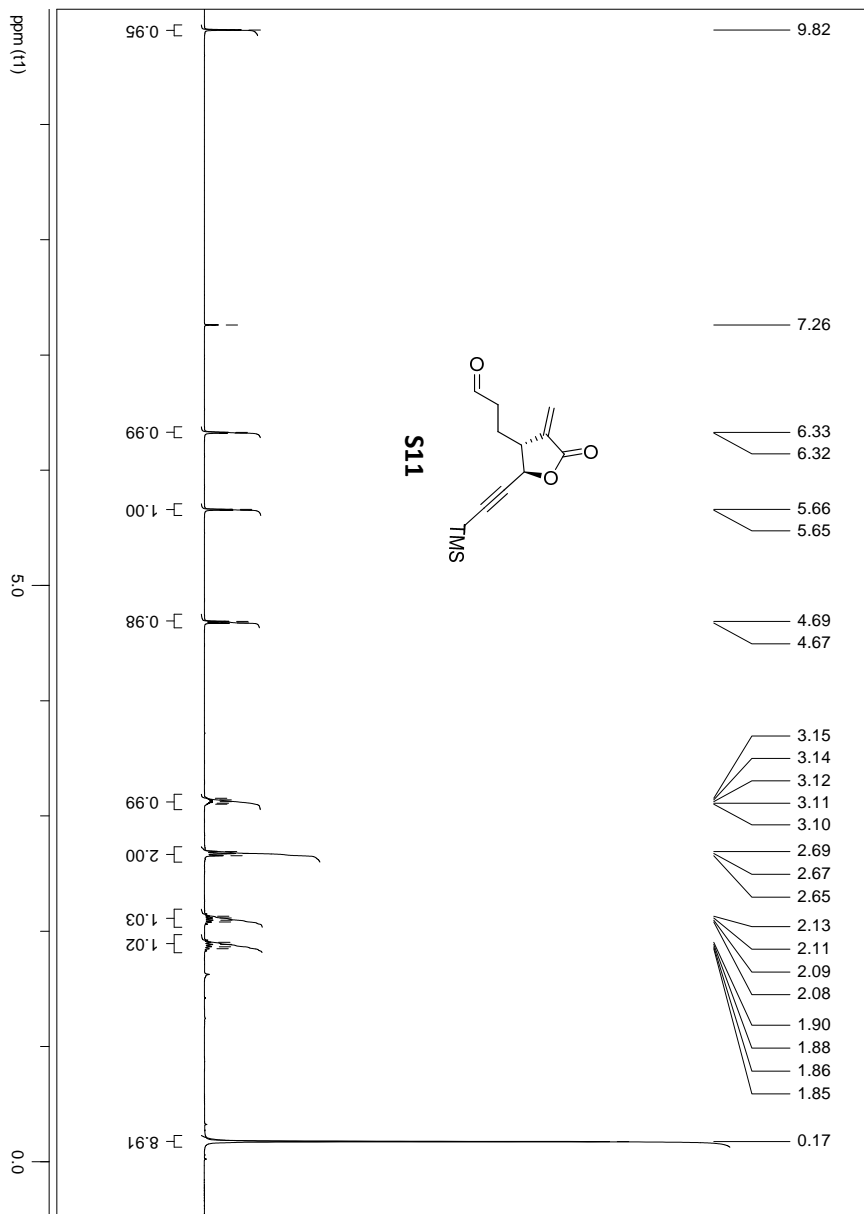



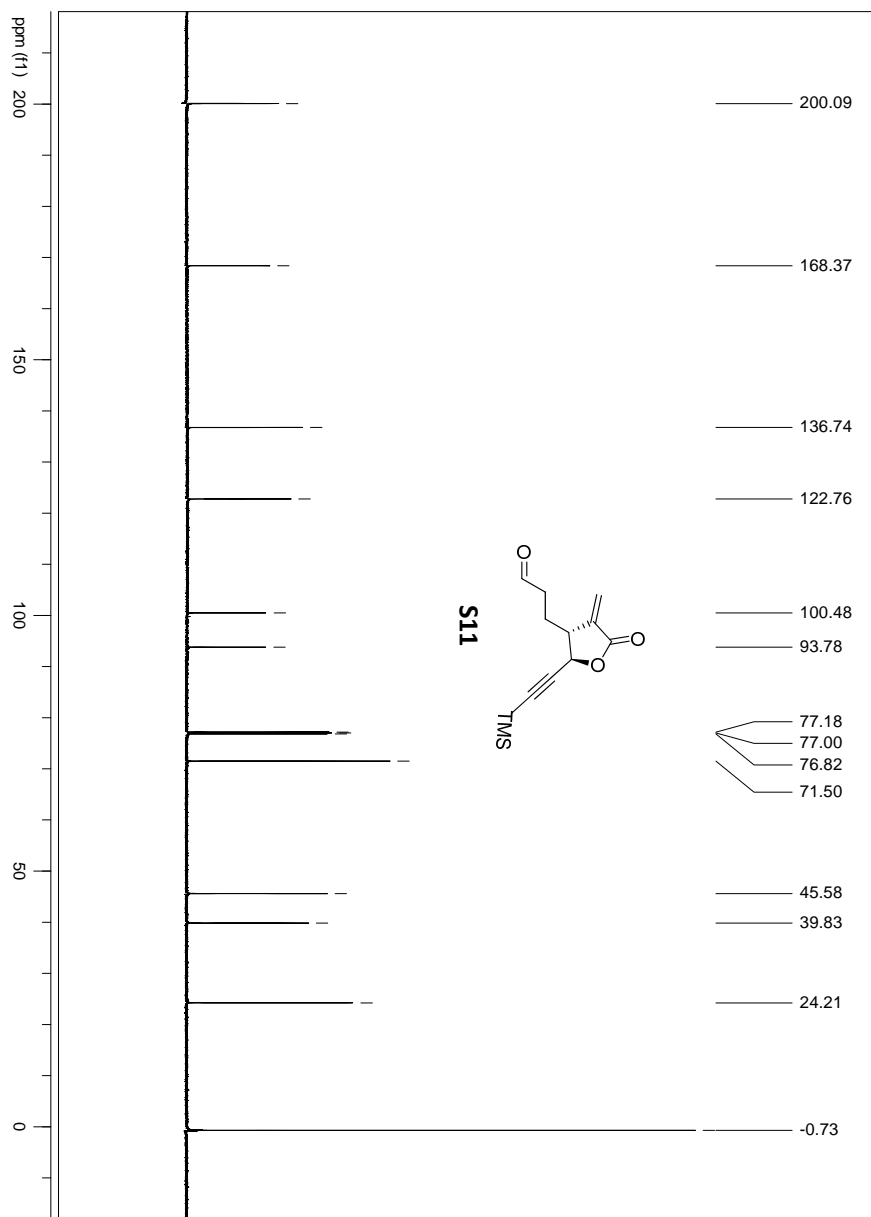

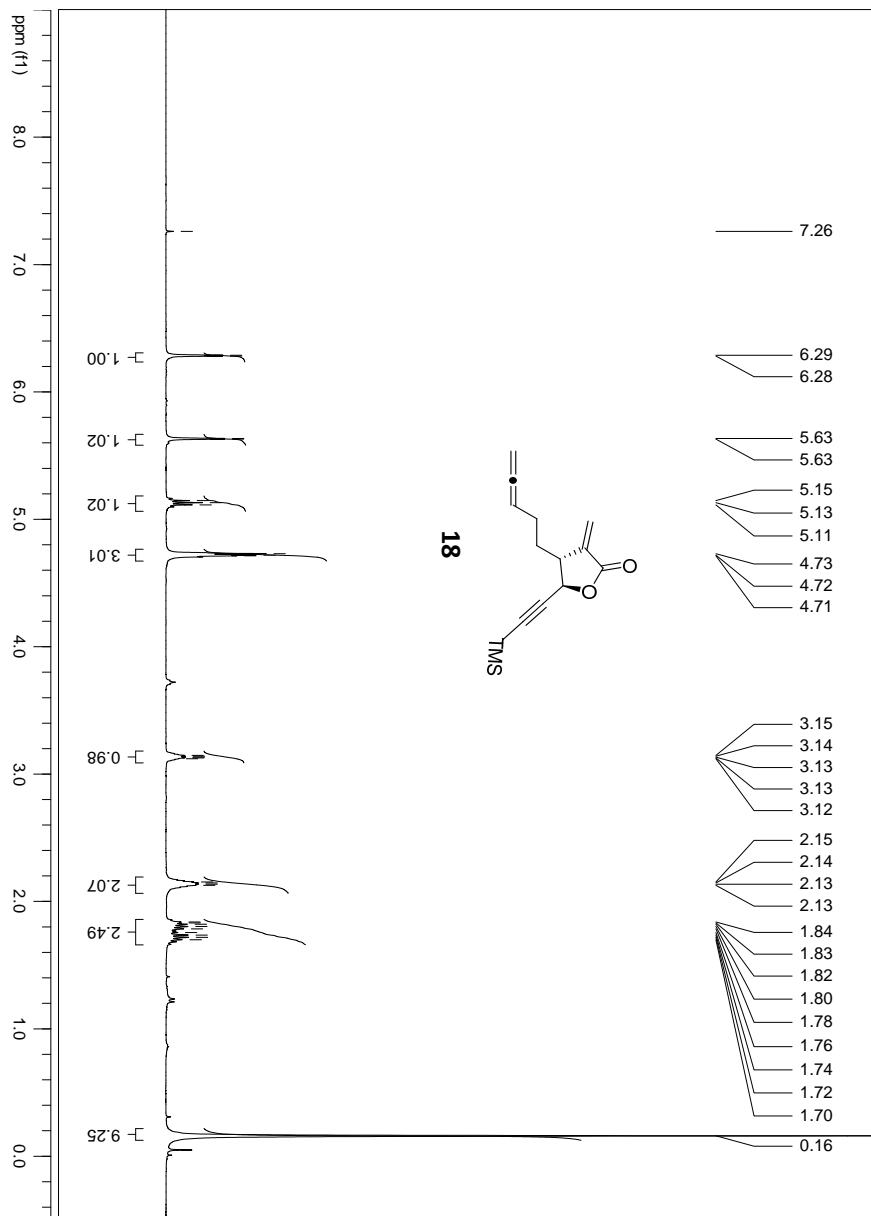

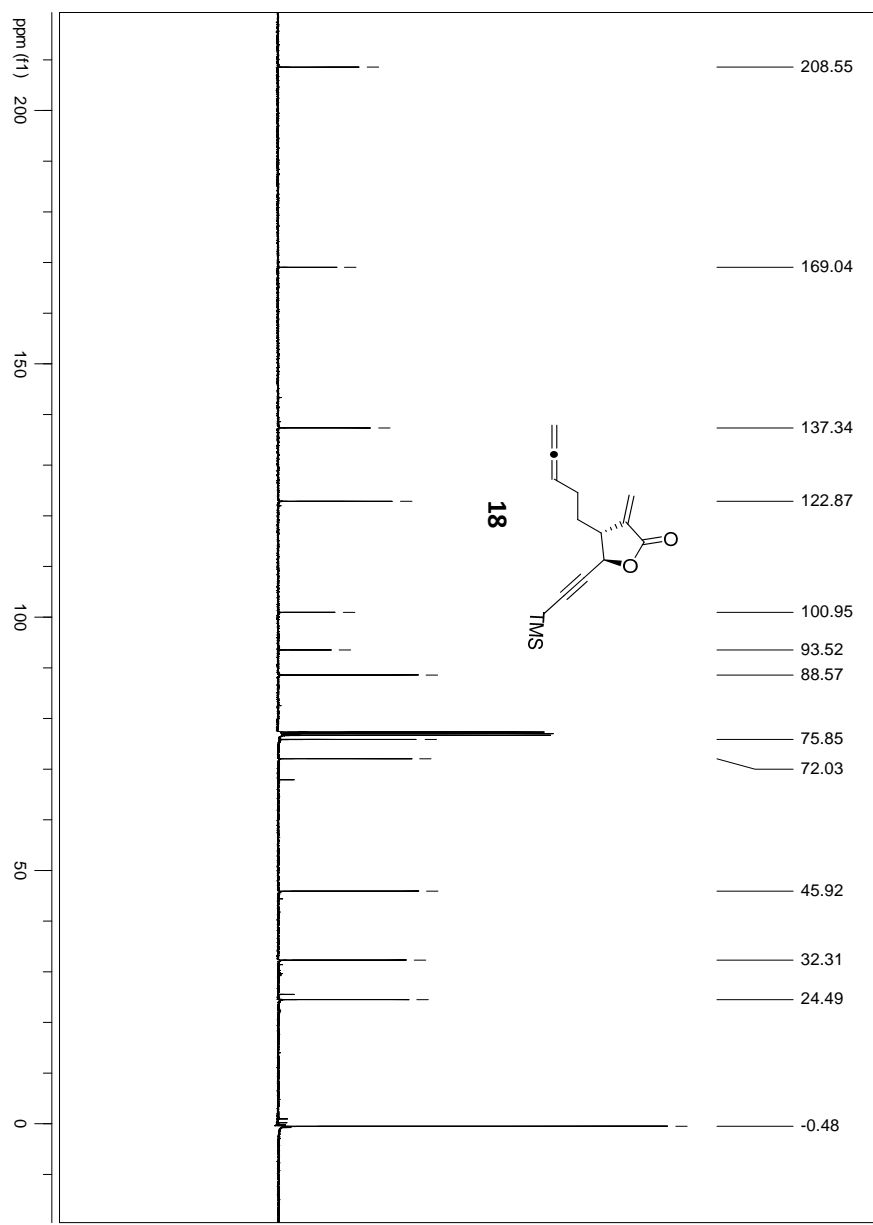

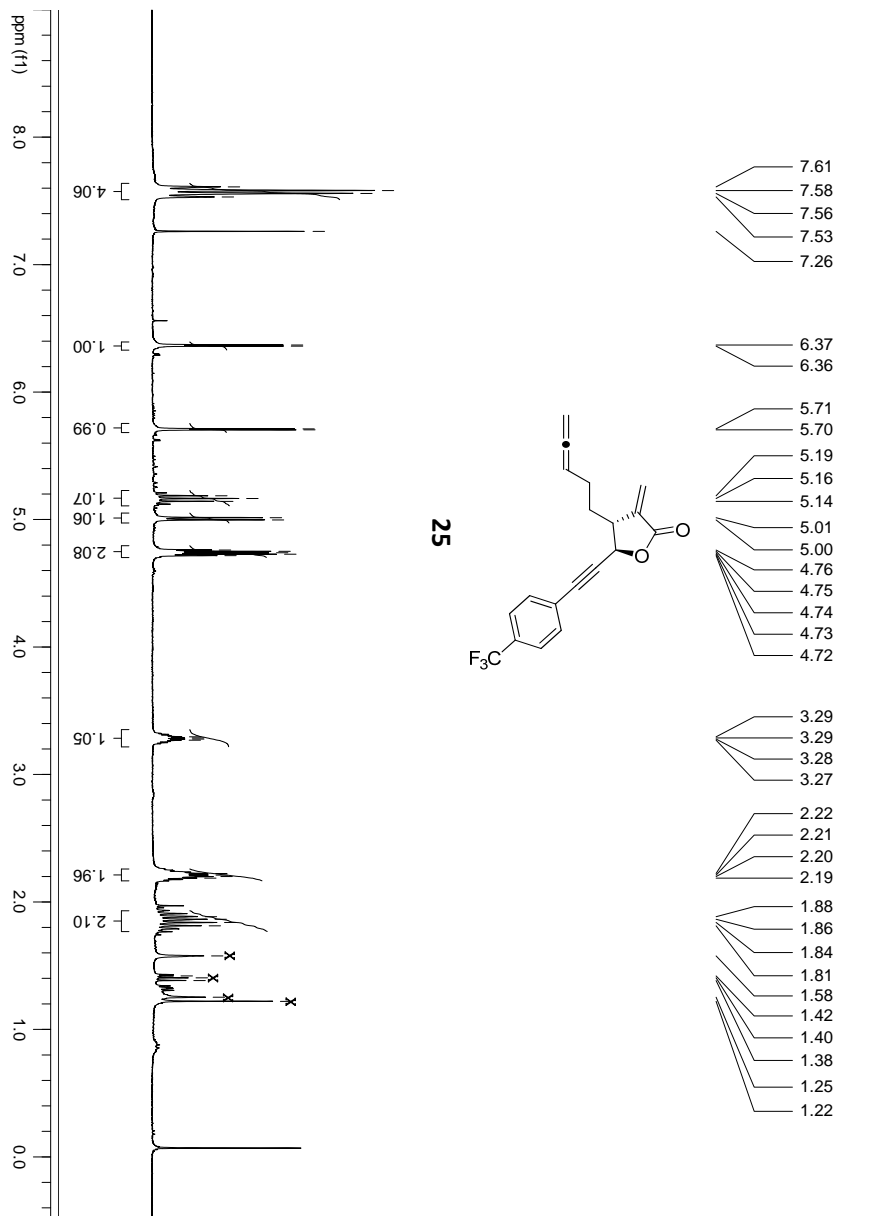

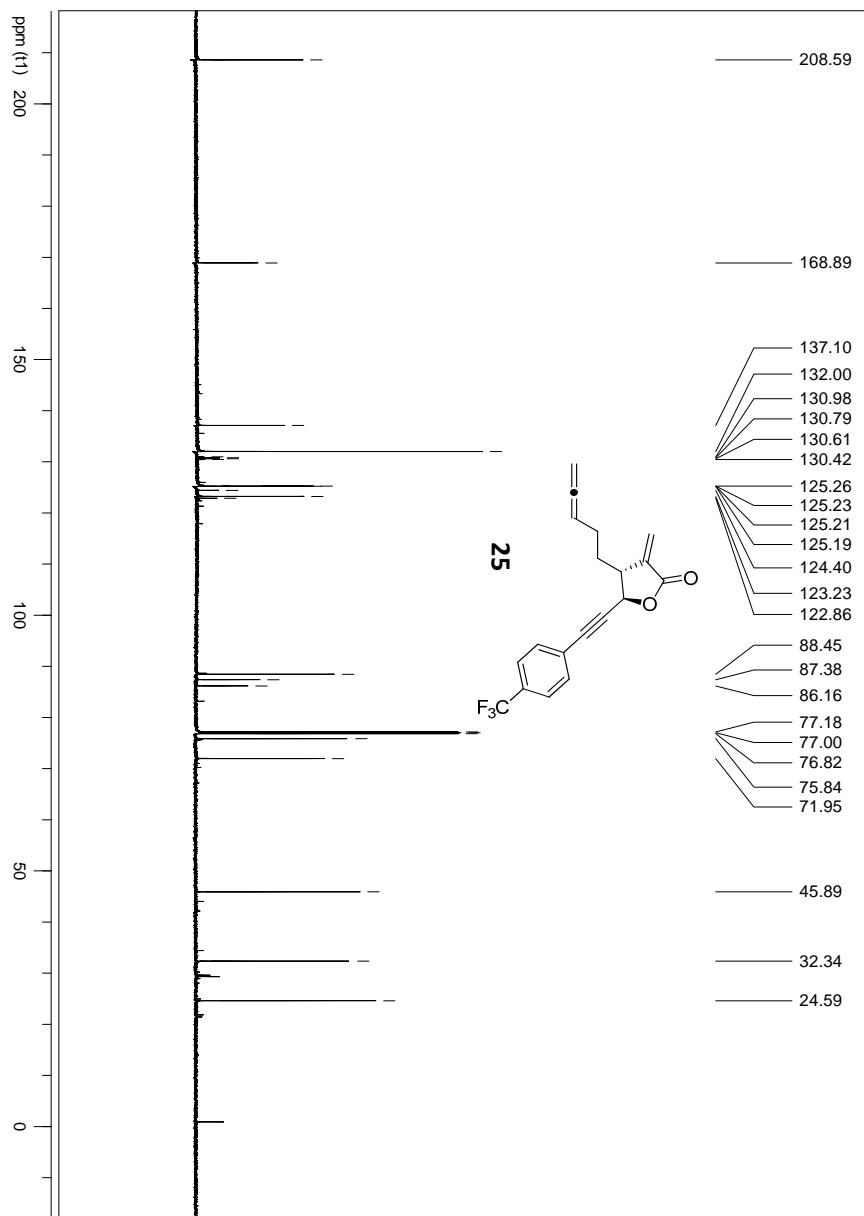

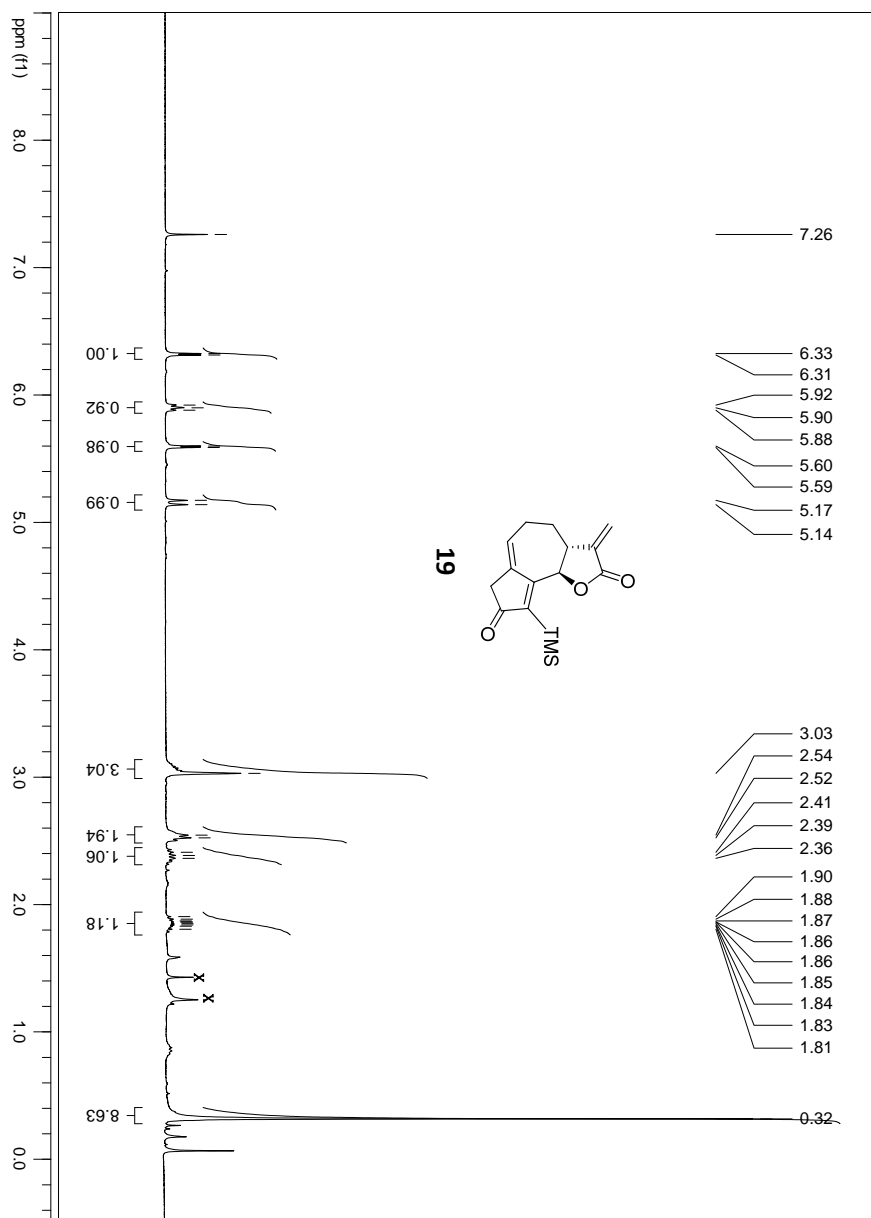

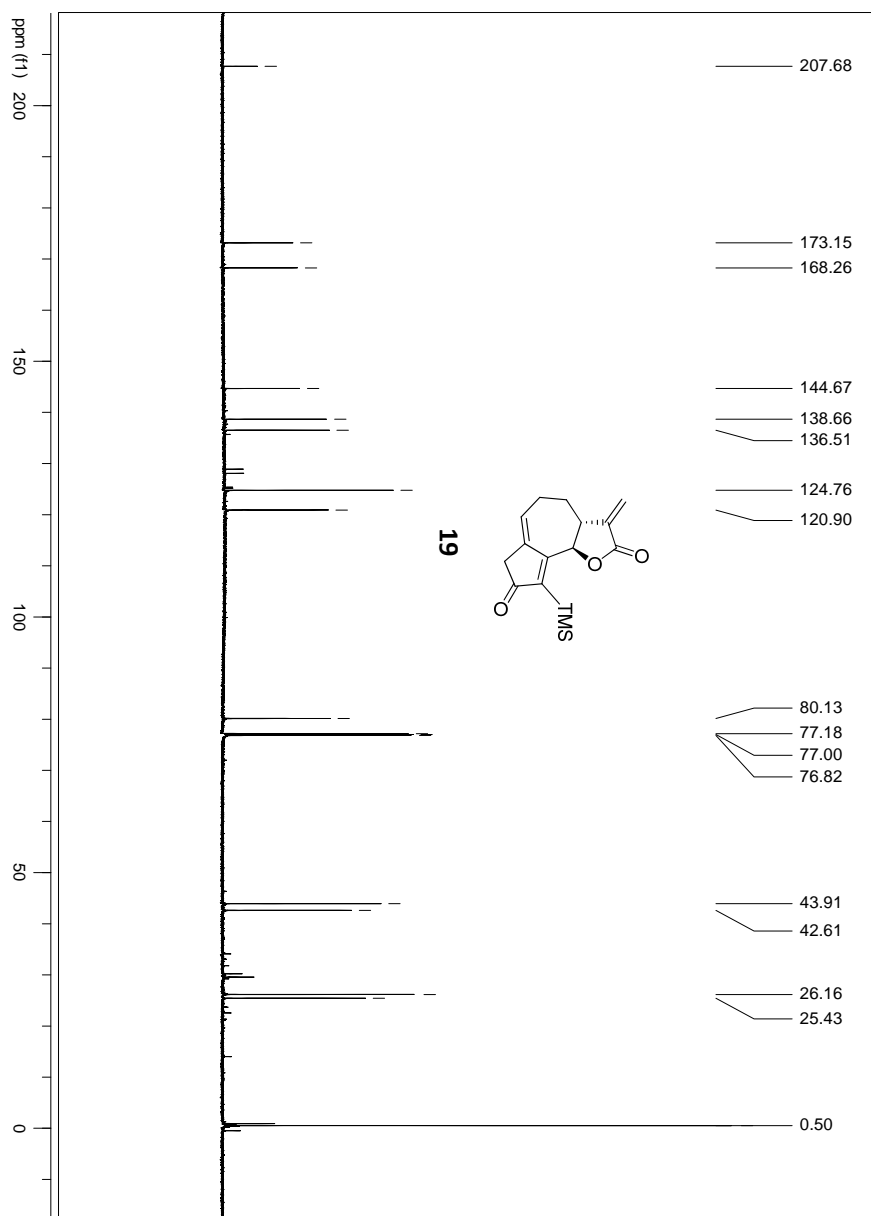

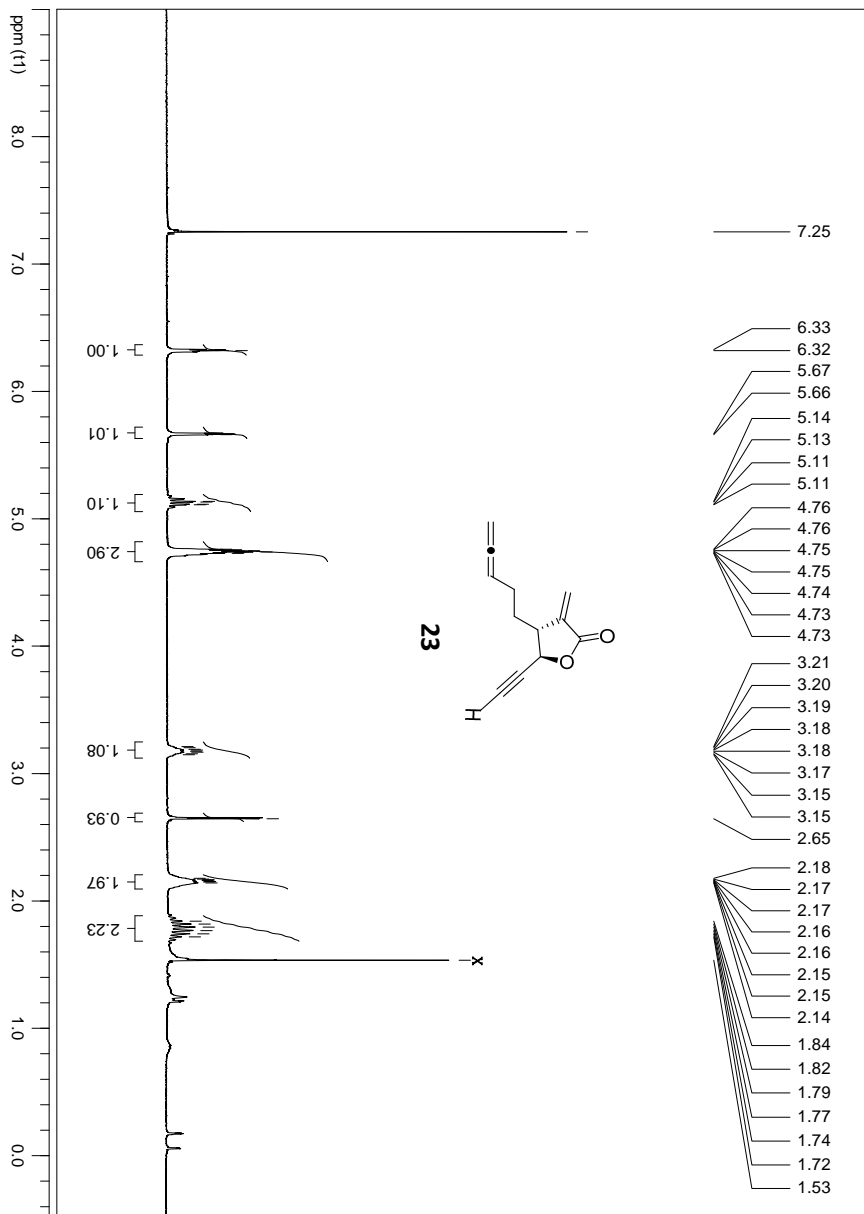



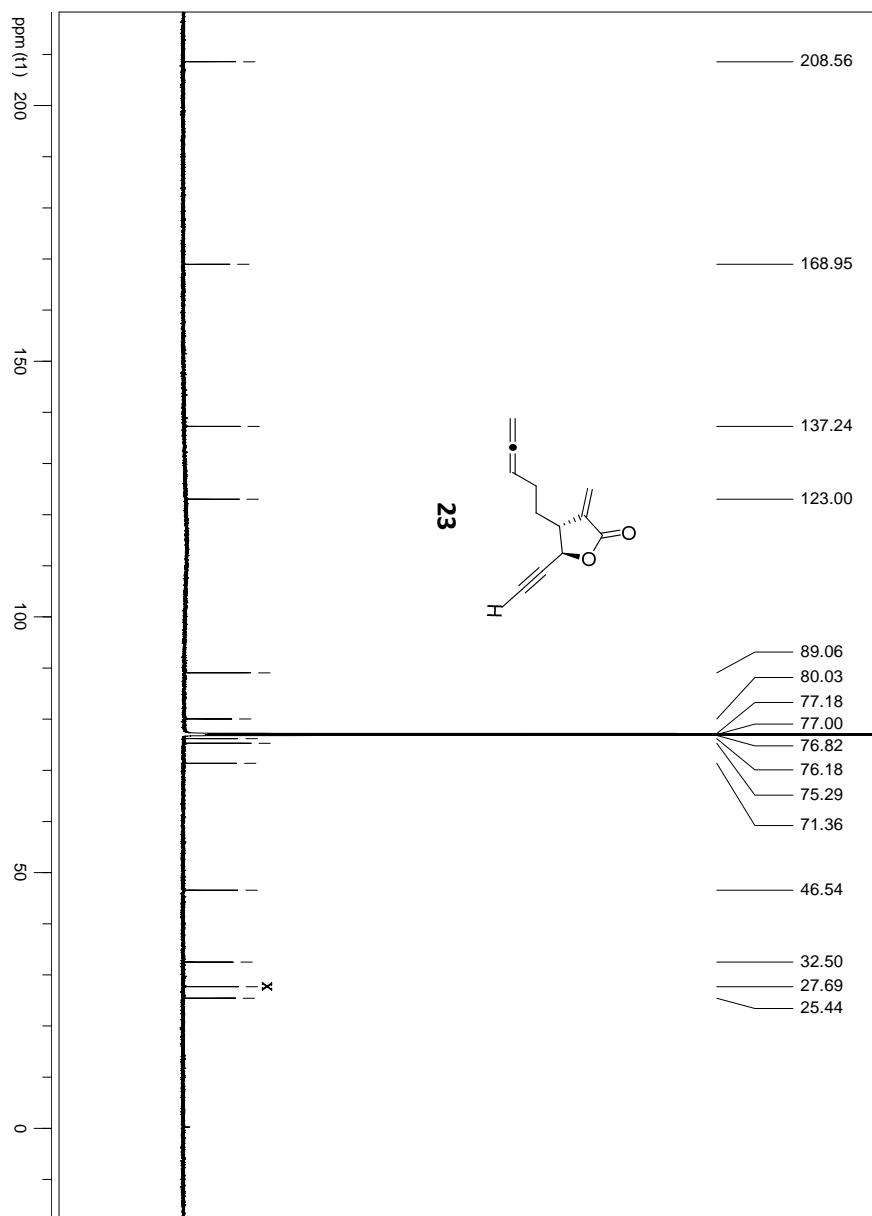

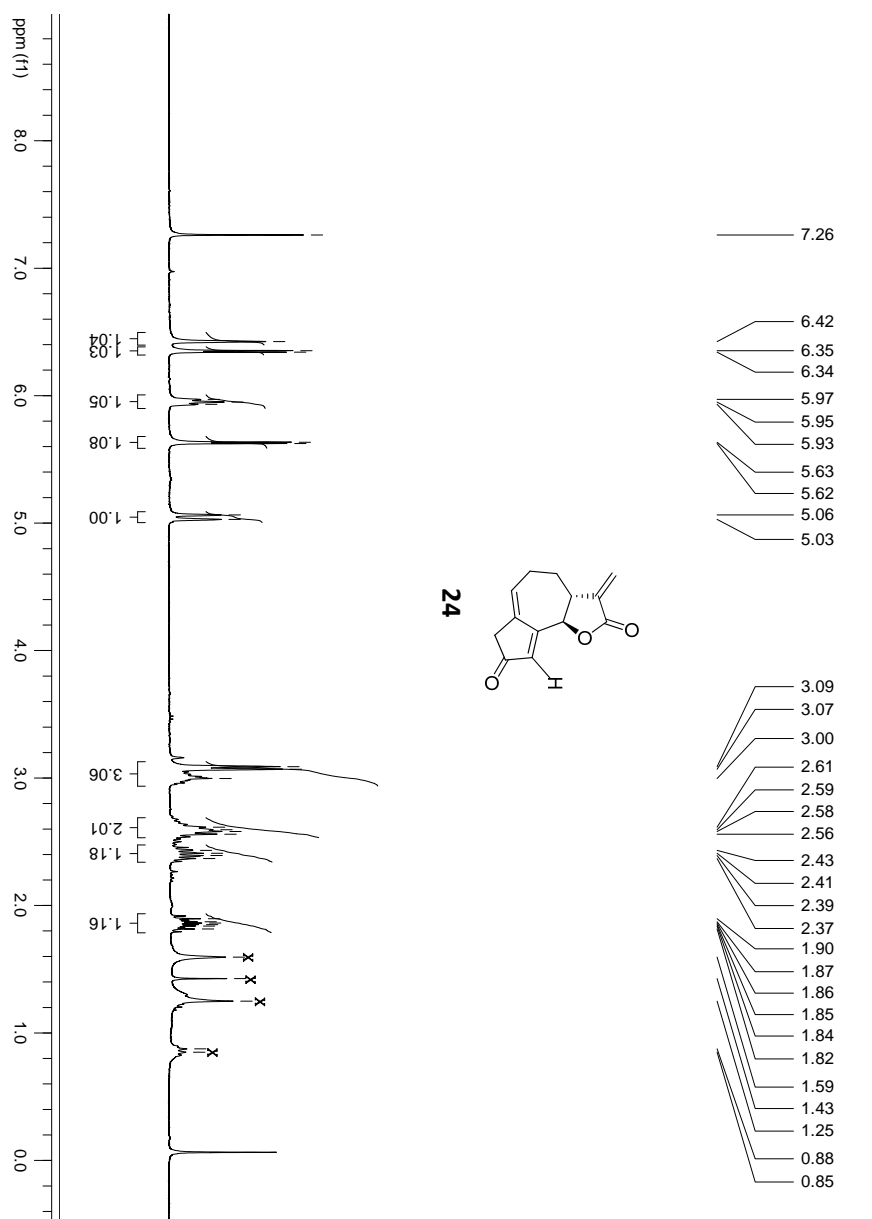

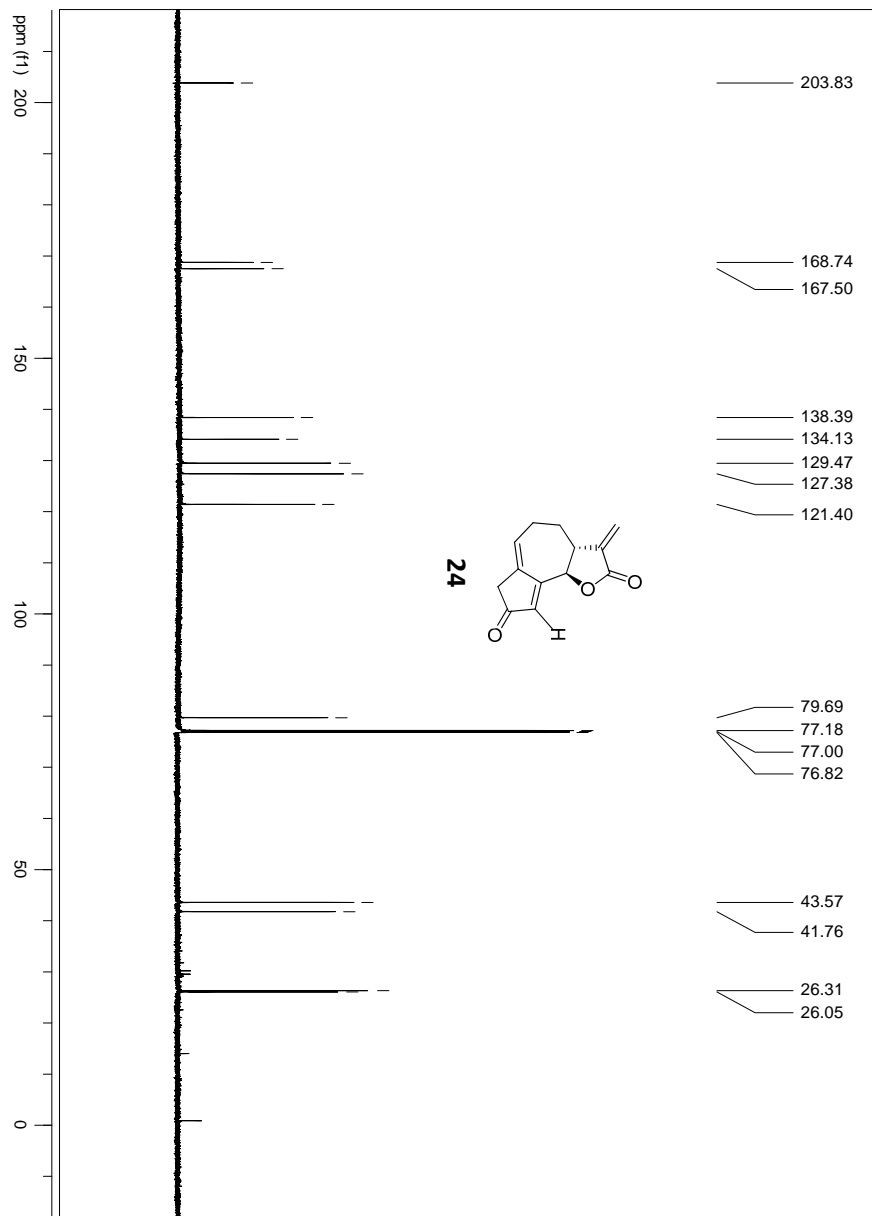

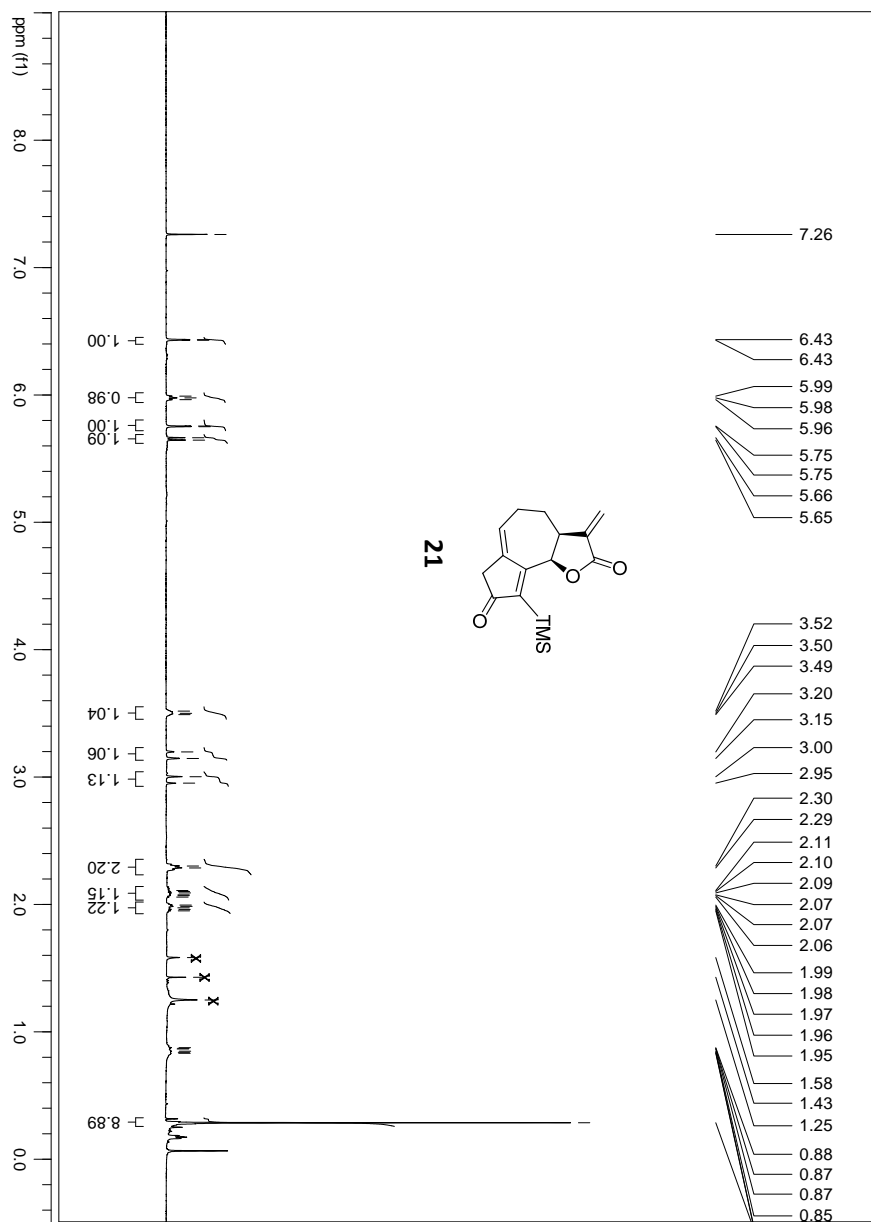

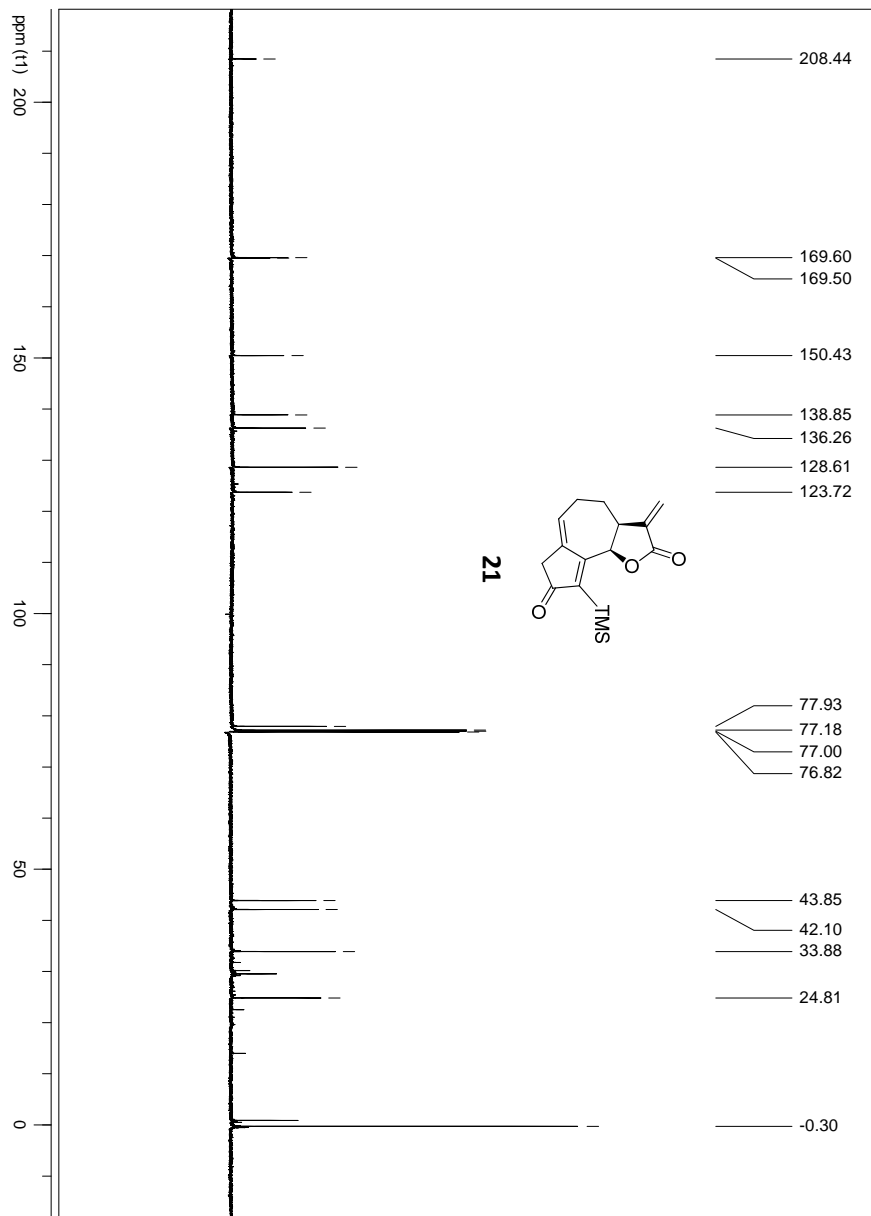

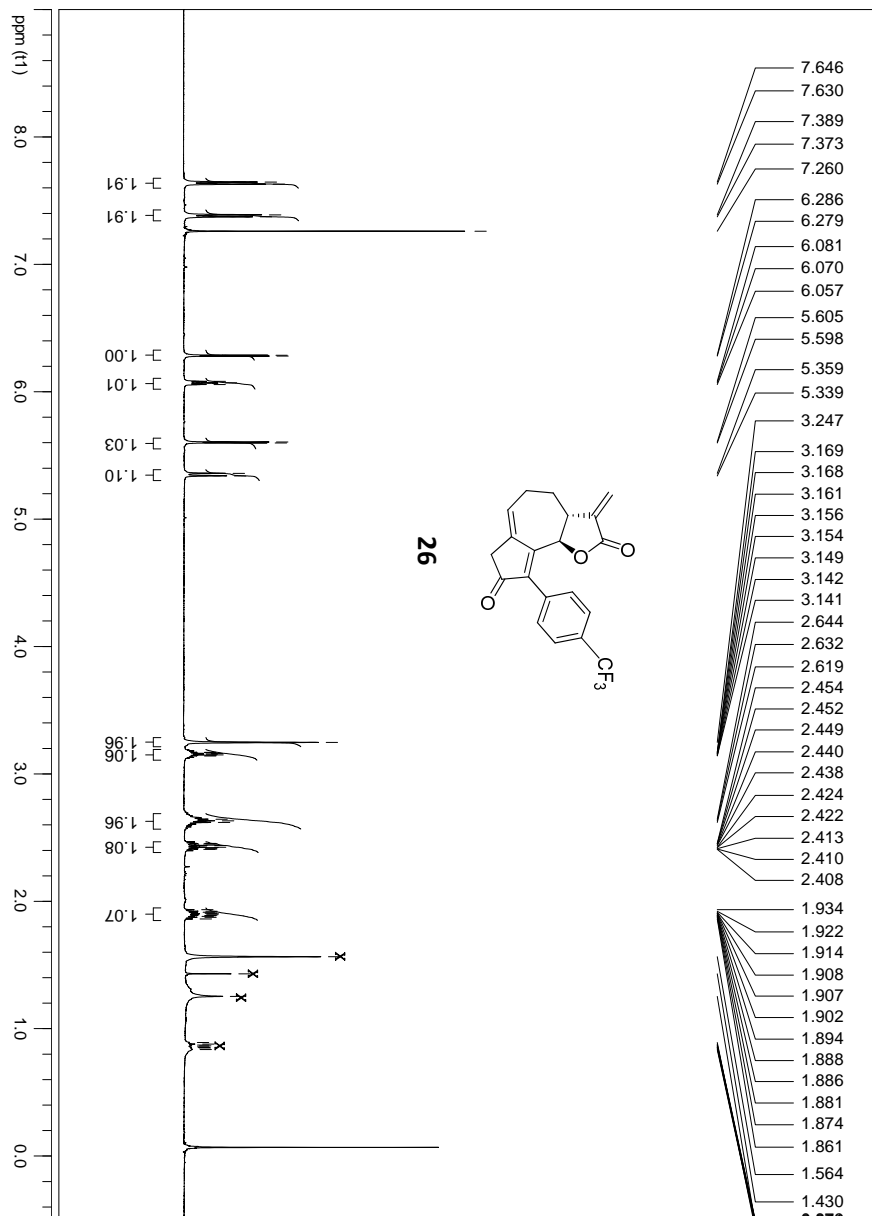

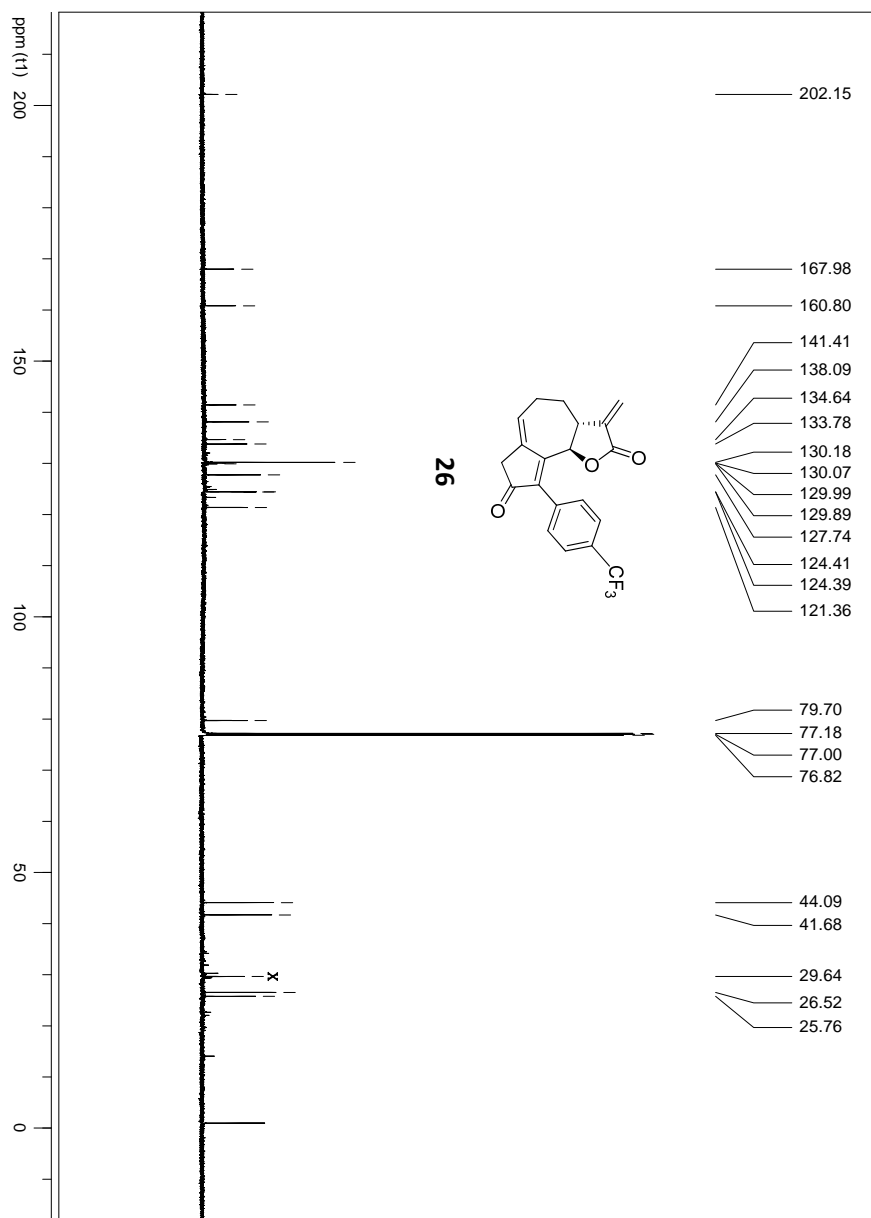

Supplement: NIHMS338067-supplement-1_si_001.pdf [file NIHMS338067-supplement-1_si_001.pdf]
